# Supplementary material for: Transition-metal-free synthesis of vicinal triborated compounds and selective functionalisation of the internal C–B bond
Source: Royal Society of Chemistry journal article supplement (doi:10.1039/c8cc06153j), 2018-01-01
Supplement: c8cc06153j1.pdf [file c8cc06153j1.pdf]

## Supporting Information

### Transition-metal-free synthesis of vicinal triborated compounds and selective functionalisation of the internal C-B bond

Elliot Davenport<sup>[a,b]</sup> and Elena Fernández<sup>\*[a]</sup>

- 
- [a] Dr. Elena Fernández, Mr. Elliot Davenport  
Department Química Física i Inorgànica  
University Rovira i Virgili  
Tarragona, Spain  
E-mail: mariaelena.fernandez@urv.cat
- [b] Mr. Elliot Davenport  
Department Chemistry  
Edinburgh University  
Edinburgh, UK

### Content:

#### General Information

General procedure for the preparation of 1,3-dienes via Wittig olefination

Spectral data of 1,3-dienes

General procedure for the transition metal-free 1,4-hydroboration reaction

General procedure for the transition metal free 1,2-diboration reaction

General procedure for the transition metal-free 1,2,3,4-tetraboration reaction

General procedure for the transition metal-free 1,2,3-triboration reaction

Spectral data of borylated compounds

General Procedure for the Suzuki-Miyaura Cross-Coupling Reaction

Spectral Data for Suzuki-Miyaura Cross-Coupling Products

NMR for 1,3-dienes

NMR for Borylated Compounds

NMR for Suzuki-Miyaura Cross-Coupling Products

X-Ray crystal data for 38

## General Information

NMR spectra were recorded at 300K using a Varian Goku 400 (400 MHz) spectrometer or a Varian Mercury 400 (400 MHz) spectrometer. Chemical shifts ( $\delta$ ) are reported in ppm with the solvent resonance as the internal standard ( $\text{CHCl}_3$ : 7.26 ppm ( $^1\text{H}$ )) and ( $\text{CDCl}_3$ : 77.16 ppm ( $^{13}\text{C}$ )).  $^{11}\text{B}\{^1\text{H}\}$  NMR chemical shifts ( $\delta$ ) are reported in ppm relative to  $(\text{CH}_3\text{CH}_2)_2\text{O}--\text{BF}_3$ . Data are reported as follows: chemical shift, multiplicity (d = doublet, t = triplet, q = quartet, br = broad, m = multiplet), coupling constants (Hz) and integration. *High resolution mass spectra (HRMS)* were recorded using a 6210 Time of Flight (TOF) mass spectrometer from Agilent Technologies (Waldbronn, Germany) with an ESI interface and it was performed at the Servei de Recursos Científics i Tècnics (Universitat Rovira I Virgili, Tarragona) or using a BIOTOF II Time of Flight (TOF) mass spectrometer from Bruker with an APCI interface or an EI interface and it was performed at the Unidade de Espectrometria de Masas e Proteómica (Universidade de Santiago de Compostela, Santiago de Compostela). Solvents and reagents were obtained from commercial suppliers such as Sigma Aldrich or Alfa Aesar and used as received. All reactions were conducted in oven and flame-dried glassware under an inert atmosphere of argon, using Schlenk-type techniques. Flash chromatography was performed on standard silica gel (Merck Kieselgel 60 F<sub>254</sub> 400-630 mesh) using standard visualising agents: UV fluorescence (254 nm) and potassium permanganate/ $\Delta$ . GC-MS analysis was performed on an HP6890 gas chromatograph with an Agilent Technologies 5973 Mass selective detector (Waldbronn, Germany) equipped with an achiral capillary column HP-5 (30 m, 0.25 mm, i.d., 0.25  $\mu\text{m}$  thickness) using He as the carrier gas.

## General procedure for the preparation of 1,3-dienes via Wittig olefination<sup>1</sup>

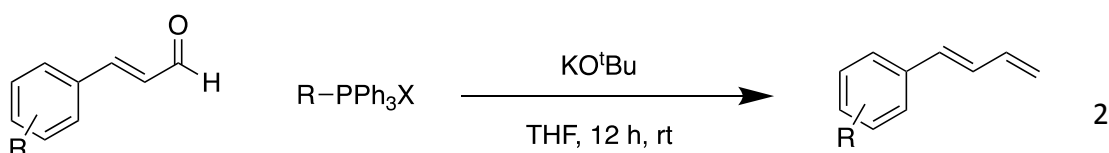

To a dry reaction vessel equipped with a magnetic stirrer bar, alkyl phosphonium bromide (3.75 mmol, 1.25 equiv) and potassium tert-butoxide (3.9 mmol, 1.3 equiv) were added. The flask was flushed with argon 3 times and dry THF (8 mL) was added slowly with stirring at room temperature. The mixture was left for 30 minutes before the corresponding aldehyde, dissolved in dry THF (4 mL), was added dropwise over 10 minutes at room temperature. The mixture was then left to stir for 16 hours. The reaction was quenched with aqueous saturated ammonium chloride solution (25 mL). The aqueous layer was then extracted three times with diethyl ether before the combined organic extracts were washed with brine and dried over sodium sulphate. After filtration, the volatile components were removed under reduced pressure. The crude residue was purified by silica gel flash chromatography to afford the diene product.

#### **Spectral data of 1,3-dienes:**

##### **(E)-1-(buta-1,3-dien-1-yl)-4-chlorobenzene (7)**

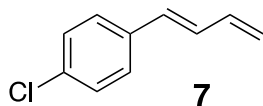

The product was synthesised according to the general procedure using methyl phosphonium bromide (1.34 g, 3.75 mmol) and *trans*-4-chlorocinnamaldehyde (499.8 mg, 3 mmol). The product was purified by flash column chromatography using pentane:ethyl acetate (40:1) as eluent. The product **7** was obtained as an orange oil (2.44 mmol, 81.4%).

**<sup>1</sup>H NMR (400 MHz, CDCl<sub>3</sub>)**  $\delta$  = 7.28 – 7.15 (m, 4H), 6.74 – 6.60 (m, 1H), 6.49 – 6.34 (m, 2H), 5.31 – 5.22 (d, *J* = 16.2 Hz, 1H), 5.12 (d, *J* = 9.2 Hz, 1H).

**<sup>13</sup>C NMR (100 MHz, CDCl<sub>3</sub>)**  $\delta$  = 136.9, 135.7, 133.2, 131.5, 130.2, 128.8, 127.6, 118.2.

- 
1. S. R. Sardini, M. K. Brown, *J. Am. Chem. Soc.*, 2017, **139**, 9823.

##### **(E)-4-(buta-1,3-dien-1-yl)-*N,N*-dimethylaniline (9)**

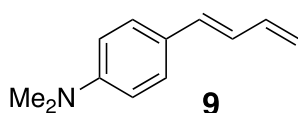

The product was synthesised according to the general procedure using methyl phosphonium bromide (1.34 g, 3.75 mmol) and *trans*-4-(dimethylamino)cinnamaldehyde (525.7 mg, 3 mmol). The product was purified by flash column chromatography using pentane:ethyl acetate (10:1) as eluent. The product **9** was obtained as a yellow solid (2.80 mmol, 95%).

**<sup>1</sup>H NMR (400 MHz, CDCl<sub>3</sub>)**  $\delta$  = 7.35 – 7.28 (m, 2H), 6.73 – 6.58 (m, 1H), 6.56 – 6.43 (m, 2H), 5.24 (d, *J* = 17.4 Hz, 1H), 5.05 (d, *J* = 10.0 Hz, 1H), 2.97 (s, 6H).

**<sup>13</sup>C NMR (100 MHz, CDCl<sub>3</sub>)**  $\delta$  = 150.1, 137.8, 133.1, 127.5, 125.6, 125.6, 115.0, 112.4, 40.5.

#### (*E*)-1-(buta-1,3-dien-1-yl)-4-methylbenzene (**11**)

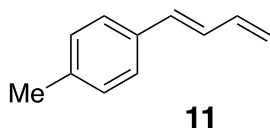

The product was synthesised according to the general procedure using methyl phosphonium bromide (1.34 g, 3.75 mmol) and *trans*-4-methylcinnamaldehyde (438.57 mg, 3 mmol). The product was purified by flash column chromatography using pentane as eluent. The product **11** was obtained as a yellow liquid (2.06 mmol, 69%).

**<sup>1</sup>H NMR (400 MHz, CDCl<sub>3</sub>)**  $\delta$  = 7.23 (d, *J* = 8.1 Hz, 2H), 7.06 (d, *J* = 7.9 Hz, 2H), 6.68 (dd, *J* = 15.6, 10.5 Hz, 1H), 6.52 – 6.36 (m, 2H), 5.23 (d, *J* = 16.5 Hz, 1H), 5.07 (d, *J* = 9.7 Hz, 1H), 2.27 (s, 3H).

**<sup>13</sup>C NMR (100 MHz, CDCl<sub>3</sub>)**  $\delta$  = 137.6, 137.3, 134.3, 132.8, 129.4, 128.7, 126.4, 117.1, 21.3.

#### (*E*)-1-(buta-1,3-dien-1-yl)-4-methoxybenzene (**13**)

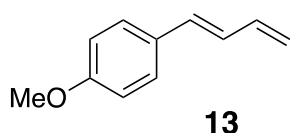

The product was synthesised according to the general procedure using methyl phosphonium bromide (1.34 g, 3.75 mmol) and *trans*-*p*-methoxycinnamaldehyde

(486.57 mg, 3 mmol). The product was purified by flash column chromatography using pentane:ethyl acetate (4:1) as eluent. The product **13** was obtained as a colourless oil (2.82 mmol, 94%).

**<sup>1</sup>H NMR (400 MHz, CDCl<sub>3</sub>)**  $\delta$  = 7.28 (d, *J* = 8.7 Hz, 2H), 6.79 (d, *J* = 8.8 Hz, 2H), 6.60 (dd, *J* = 15.4, 10.6 Hz, 1H), 6.49 – 6.34 (m, 2H), 5.21 (d, *J* = 15.4 Hz, 1H), 5.05 (d, *J* = 9.2 Hz, 1H), 3.74 (s, 3H).

**<sup>13</sup>C NMR (100 MHz, CDCl<sub>3</sub>)**  $\delta$  = 159.3, 137.4, 132.4, 129.9, 127.7, 116.5, 114.1, 55.3.

### **(E)-1-(buta-1,3-dien-1-yl)-2-methoxybenzene (15)**

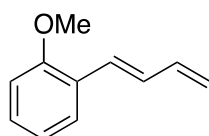

**15**

The product was synthesised according to the general procedure using methyl phosphonium bromide (1.34 g, 3.75 mmol) and 2-methoxycinnamaldehyde (486.6 mg, 3 mmol). The product was purified by flash column chromatography using pentane:ethyl acetate (30:1) as eluent. The product **15** was obtained as a yellow liquid (2.68 mmol, 88%).

**<sup>1</sup>H NMR (400 MHz, CDCl<sub>3</sub>)**  $\delta$  = 7.41 (dd, *J* = 7.7, 1.7 Hz, 1H), 7.22 – 7.08 (m, 1H), 6.93 – 6.64 (m, 4H), 6.56 – 6.36 (m, 1H), 5.24 (ddd, *J* = 17.0, 1.7, 0.8 Hz, 1H), 5.07 (ddd, *J* = 10.0, 1.7, 0.8 Hz, 1H), 3.78 (s, 3H).

**<sup>13</sup>C NMR (100 MHz, CDCl<sub>3</sub>)**  $\delta$  = 156.8, 138.0, 130.3, 128.7, 127.6, 126.5, 126.1, 120.7, 117.0, 110.9, 55.5.

### **(E)-2-(buta-1,3-dien-1-yl)furan (17)**

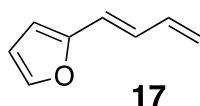

**17**

The product was synthesised according to the general procedure using methyl phosphonium bromide (1.34 g, 3.75 mmol) and 3-(2-furyl)acrolein (366.36 mg, 3 mmol). The product was purified by flash column chromatography using pentane as eluent. The product **17** was obtained as a yellow oil (1.59 mmol, 53%).

**<sup>1</sup>H NMR (400 MHz, CDCl<sub>3</sub>)**  $\delta$  = 7.29 (d,  $J$  = 1.8 Hz, 1H), 6.63 (dd,  $J$  = 15.6, 10.8 Hz, 1H), 6.44 – 6.24 (m, 3H), 6.20 (d,  $J$  = 3.3 Hz, 1H), 5.25 (d,  $J$  = 17.7 Hz, 1H), 5.08 (d,  $J$  = 10.0 Hz, 1H).

**<sup>13</sup>C NMR (100 MHz, CDCl<sub>3</sub>)**  $\delta$  = 153.0, 142.2, 136.7, 128.2, 120.4, 117.8, 111.6, 108.6.

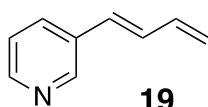

**19**

**(E)-3-(buta-1,3-dien-1-yl)pyridine (19)**

The product was synthesised according to the general procedure using methyl phosphonium bromide (835 mg, 3.75 mmol) and 3-(3-pyridyl)acrolein (250 mg, 1.87 mmol). The product was purified by flash column chromatography using pentane:ethyl acetate (10:1) as eluent. The product **19** was obtained as a yellow oil (1.4 mmol, 77%).

**<sup>1</sup>H NMR (400 MHz, CDCl<sub>3</sub>)**  $\delta$  = 8.55 (s, 1H), 8.39 (d,  $J$  = 4.9 Hz, 1H), 7.73 – 7.57 (m, 1H), 7.19 (m, 1H), 6.77 (dd,  $J$  = 16.4, 10.7, 1H), 6.54 – 6.36 (m, 2H), 5.33 (d,  $J$  = 16.4 Hz, 1H), 5.19 (d,  $J$  = 10.1 Hz, 1H).

**<sup>13</sup>C NMR (100 MHz, CDCl<sub>3</sub>)**  $\delta$  = 148.3, 148.2, 136.6, 132.9, 132.8, 131.7, 128.9, 123.6, 119.3.

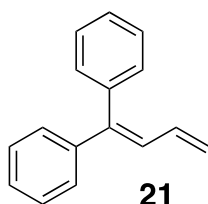

**21**

**buta-1,3-diene-1,1-diylidibenzene (21)**

The product was synthesised according to the general procedure using methyl phosphonium bromide (1.34 g, 3.75 mmol) and  $\beta$ -phenylcinnamaldehyde (624.78 mg, 3 mmol). The product was purified by flash column chromatography using pentane:ethyl acetate (30:1) as eluent. The product **21** was obtained as a yellow liquid (2.85 mmol, 95%).

**<sup>1</sup>H NMR (400 MHz, CDCl<sub>3</sub>)**  $\delta$  = 7.27 (m, 3H), 7.20 – 7.09 (m, 7H), 6.63 (d, *J* = 11.0 Hz, 1H), 6.35 (ddd, *J* = 16.8, 11.0, 10.1 Hz, 1H), 5.34 – 5.25 (dd, *J* = 16.9, 1.5 Hz, 1H), 5.03 (dd, *J* = 10.1, 1.9 Hz, 1H).

**<sup>13</sup>C NMR (100 MHz, CDCl<sub>3</sub>)**  $\delta$  = 143.2, 142.1, 139.7, 135.0, 130.4, 128.5, 128.2, 127.6, 127.5, 127.4, 118.6.

### **((1*E*)-penta-1,3-dien-1-yl)benzene (23)**

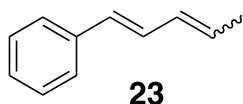

The product was synthesised according to the general procedure using ethyl phosphonium bromide (1.39 g, 3.75 mmol) and *trans*-cinnamaldehyde (396.48 mg, 3 mmol). The product was purified by flash column chromatography using pentane as eluent. The product **23** was obtained as a yellow oil (2.2 mmol, 72%) (*E*:*Z* = 78:22).

**<sup>1</sup>H NMR (400 MHz, CDCl<sub>3</sub>)**  $\delta$  = (*E*): 7.38 – 7.29 (m, 2H), 7.25 – 7.16 (m, 2H), 7.15 – 7.05 (m, 1H), 6.99 (dd, *J* = 15.6, 11.1 Hz, 1H), 6.43 (d, *J* = 15.6 Hz, 1H), 6.19 – 6.02 (m, 1H), 5.58 – 5.45 (m, 1H), 1.77 (dd, *J* = 7.2, 1.8 Hz, 3H). (*Z*): 7.29 – 7.25 (m, 2H), 7.25 – 7.16 (m, 2H), 7.15 – 7.05 (m, 1H), 6.65 (dd, *J* = 15.7, 10.4 Hz, 1H), 6.33 (d, *J* = 15.7 Hz, 1H), 6.19 – 6.02 (m, 1H), 5.74 (dq, *J* = 14.0, 6.8 Hz, 1H), 1.73 (dd, *J* = 6.8, 1.6 Hz, 3H).

**<sup>13</sup>C NMR (100 MHz, CDCl<sub>3</sub>)**  $\delta$  = (*E*:*Z* = 78:22) 137.7, 131.9, 130.3, 129.8, 129.7, 129.4, 128.6, 128.5, 127.3, 127.1, 127.1, 126.3, 126.1, 124.2, 18.3, 13.6.

### **1-chloro-4-((1*E*)-penta-1,3-dien-1-yl)benzene (25)**

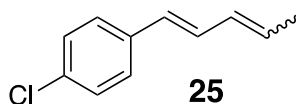

The product was synthesised according to the general procedure using ethyl phosphonium bromide (1.39 g, 3.75 mmol) and *trans*-4-chlorocinnamaldehyde (499.8 mg, 3 mmol). The product was purified by flash column chromatography using pentane as eluent. The product **25** was obtained as a yellow solid (2.6 mmol, 87%) (*E*:*Z* = 56:44).

**<sup>1</sup>H NMR (400 MHz, CDCl<sub>3</sub>) δ = (E):** 7.29 – 7.15 (m, 4H), 6.63 (dd, *J* = 15.7, 10.4 Hz, 1H), 6.28 (d, *J* = 15.7 Hz, 1H), 6.19 – 6.03 (m, 1H), 5.83 – 5.70 (m, 1H), 1.74 (dd, *J* = 6.8, 1.6 Hz, 3H). (Z): 7.29 – 7.15 (m, 4H), 6.98 (ddd, *J* = 15.6, 11.1, 1.2 Hz, 1H), 6.38 (d, *J* = 15.6 Hz, 1H), 6.19 – 6.03 (m, 1H), 5.61 – 5.48 (m, 1H), 1.78 (dd, *J* = 7.2, 1.8 Hz, 3H).

**<sup>13</sup>C NMR (100 MHz, CDCl<sub>3</sub>) δ = (E:Z = 56:44)** 136.2, 132.8, 132.5, 131.6, 131.1, 130.5, 130.0, 129.4, 128.8, 128.7, 128.4, 127.9, 127.5, 127.3, 124.7, 18.5, 13.7.

### ***N,N*-dimethyl-4-((1*E*)-penta-1,3-dien-1-yl)aniline (27)**

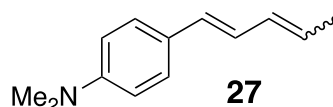

The product was synthesised according to the general procedure using ethyl phosphonium bromide (1.39 g, 3.75 mmol) and 4-(dimethylamino)cinnamaldehyde (512 mg, 3 mmol). The product was purified by flash column chromatography using pentane as eluent. The product **27** was obtained as a yellow solid (2.6 mmol, 85%) (*E:Z* = 56:44).

**<sup>1</sup>H NMR (400 MHz, CDCl<sub>3</sub>) δ = (E):** 7.29 – 7.15 (m, 4H), 6.63 (dd, *J* = 15.7, 10.4 Hz, 1H), 6.28 (d, *J* = 15.7 Hz, 1H), 6.19 – 6.03 (m, 1H), 5.83 – 5.70 (m, 1H), 1.74 (dd, *J* = 6.8, 1.6 Hz, 3H). (Z): 7.29 – 7.15 (m, 4H), 6.98 (ddd, *J* = 15.6, 11.1, 1.2 Hz, 1H), 6.38 (d, *J* = 15.6 Hz, 1H), 6.19 – 6.03 (m, 1H), 5.61 – 5.48 (m, 1H), 1.78 (dd, *J* = 7.2, 1.8 Hz, 3H).

**<sup>13</sup>C NMR (100 MHz, CDCl<sub>3</sub>) δ = (E:Z = 56:44)** 150.0, 133.3, 131.1, 129.8, 129.7, 127.3, 126.9, 125.1, 121.2, 111.3, 40.2, 19.1, 13.7.

### **(*E*)-(4-methylpenta-1,3-dien-1-yl)benzene (29)**

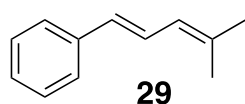

The product was synthesised according to the general procedure using isopropyl phosphonium iodide (1.62 g, 3.75 mmol) and *trans*-cinnamaldehyde (396.5 mg, 3 mmol). The product was purified by flash column chromatography using pentane as eluent. The product **29** was obtained as a clear liquid (1.95 mmol, 65%).



**<sup>1</sup>H NMR (400 MHz, CDCl<sub>3</sub>)**  $\delta$  = 7.33 (d, *J* = 7.4 Hz, 2H), 7.23 (t, *J* = 7.6 Hz, 2H), 7.11 (t, *J* = 7.3 Hz, 1H), 6.92 (dd, *J* = 15.5, 10.9 Hz, 1H), 6.35 (d, *J* = 15.5 Hz, 1H), 5.94 (d, *J* = 11.0 Hz, 1H), 1.79 (s, 3H), 1.75 (s, 3H).

**<sup>13</sup>C NMR (100 MHz, CDCl<sub>3</sub>)**  $\delta$  = 138.1, 136.7, 129.5, 128.6, 126.9, 126.1, 125.7, 125.5, 26.3, 18.6.

**(*E*)-(2-methylbuta-1,3-dien-1-yl)benzene (31)**

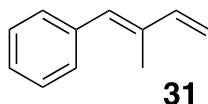

The product was synthesised according to the general procedure using methyl phosphonium bromide (1.34 g, 3.75 mmol) and  $\alpha$ -methyl-*trans*-cinnamaldehyde (438.5 mg, 3 mmol). The product was purified by flash column chromatography using pentane as eluent. The product **31** was obtained as a colourless oil (2.64 mmol, 88%).

**<sup>1</sup>H NMR (400 MHz, CDCl<sub>3</sub>)**  $\delta$  = 7.31 – 7.17 (m, 4H), 7.17 – 7.10 (m, 1H), 6.47 (dd, *J* = 17.2, 10.6, 1H), 6.43 (s, 1H), 5.21 (d, *J* = 17.5 Hz, 1H), 5.04 (d, *J* = 10.8 Hz, 1H), 1.91 (s, 3H).

**<sup>13</sup>C NMR (100 MHz, CDCl<sub>3</sub>)**  $\delta$  = 141.9, 137.7, 136.0, 131.7, 129.2, 128.2, 126.6, 113.0, 13.2.

**(*Z*)-(2-bromobuta-1,3-dien-1-yl)benzene (33)**

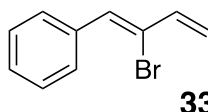

The product was synthesised according to an adapted version of the general procedure using methyl phosphonium bromide (1.34 g, 3.75 mmol),  $\alpha$ -bromocinnamaldehyde (633 mg, 3 mmol) and potassium tertbutoxide (201 mg, 0.6 equiv). The product was purified by flash column chromatography using pentane as eluent. The product **33** was obtained as a yellow oil (1.59 mmol, 53%).

**<sup>1</sup>H NMR (400 MHz, CDCl<sub>3</sub>)**  $\delta$  = 7.62 (d, *J* = 7.5 Hz, 2H), 7.37 – 7.19 (m, 3H), 6.92 (s, 1H), 6.44 (dd, *J* = 16.2, 10.4 Hz, 1H), 5.66 (d, *J* = 16.2 Hz, 1H), 5.27 (d, *J* = 10.3 Hz, 1H).

**<sup>13</sup>C NMR (100 MHz, CDCl<sub>3</sub>) δ = 137.1, 135.6, 132.3, 129.6, 128.3, 128.1, 125.5, 123.9, 119.0.**

**But-3-en-1-yn-1-ylbenzene (35)**

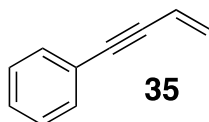

The product was synthesised according to an adapted version of the general procedure using methyl phosphonium bromide (1.34 g, 3.75 mmol),  $\alpha$ -bromocinnamaldehyde (633 mg, 3 mmol) and potassium tertbutoxide (840 mg, 2.5 equiv). The product was purified by flash column chromatography using pentane as eluent. The product **35** was obtained as a yellow oil (2.2 mmol, 72%).

**<sup>1</sup>H NMR (400 MHz, CDCl<sub>3</sub>) δ = 7.41 – 7.33 (m, 2H), 7.28 – 7.19 (m, 3H), 5.95 (dd,  $J$  = 17.5, 11.1 Hz, 1H), 5.66 (dd,  $J$  = 17.5, 2.1 Hz, 1H), 5.47 (dd,  $J$  = 11.1, 2.1 Hz, 1H).**

**<sup>13</sup>C NMR (100 MHz, CDCl<sub>3</sub>) δ = 131.6, 131.5, 128.3, 128.3, 126.8, 123.2, 117.2, 90.0, 88.1.**

### General Procedure for the transition metal-free 1,4-hydroboration reaction

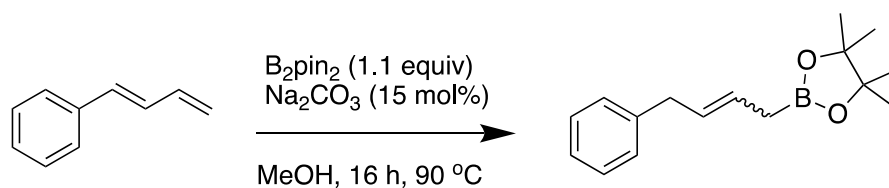

To an oven-dried Schlenk-flask equipped with a magnetic stir bar,  $B_2pin_2$  (0.55 mmol, 1.1 equiv), sodium carbonate (0.075 mmol, 0.15 equiv), dry MeOH as solvent (1 mL), and substrate **2** (0.5 mmol, 1 equiv) were added. The vial was sealed with a plastic cap and heated to 90°C in an oil bath for 16 hours. Upon completion, the reaction mixture was concentrated under reduced pressure and a known amount of naphthalene (ca. 10 mg) as internal standard was added. An aliquot was taken to determine the conversion and selectivity by  $^1H$  NMR and GC-MS analysis. The crude residue was purified by silica gel flash chromatography to afford the hydroborated product.

### General procedure for the transition metal free 1,2-diboration reaction

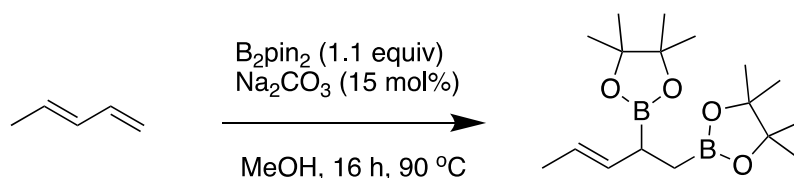

To an oven-dried Schlenk-flask equipped with a magnetic stir bar,  $B_2pin_2$  (0.55 mmol, 1.1 equiv), sodium carbonate (0.075 mmol, 0.15 equiv), dry MeOH as solvent (1 mL), and substrate **4** (0.5 mmol, 1 equiv) were added. The vial was sealed with a plastic cap and heated to 90°C in an oil bath for 16 hours. Upon completion, the reaction mixture was concentrated under reduced pressure and a known amount of naphthalene (ca. 10 mg) as internal standard was added. An aliquot was taken to determine the conversion and selectivity by  $^1H$  NMR and GC-MS analysis. The crude residue was purified by silica gel flash chromatography to afford the diborated product.

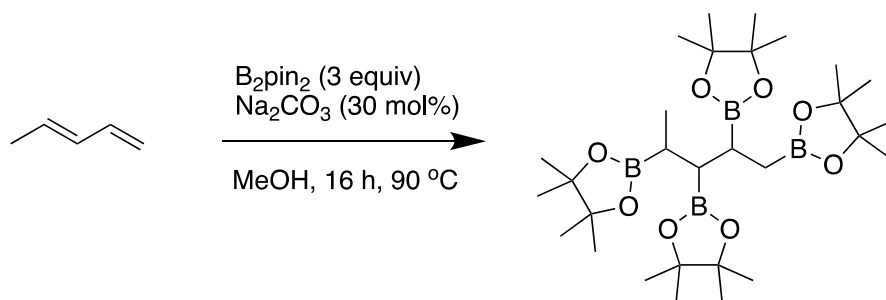

#### General procedure for the transition metal-free 1,2,3,4-tetraboration reaction

To an oven-dried Schlenk-flask equipped with a magnetic stir bar,  $B_2pin_2$  (1.50 mmol, 3 equiv), sodium carbonate (0.15 mmol, 0.3 equiv), dry MeOH as solvent (1 mL), and substrate **4** (0.5 mmol, 1 equiv) were added. The vial was sealed with a plastic cap and heated to 90°C in an oil bath for 16 hours. Upon completion, the reaction mixture was concentrated under reduced pressure and a known amount of naphthalene (ca. 10 mg) as internal standard was added. An aliquot was taken to determine the conversion and selectivity by  $^1H$  NMR and GC-MS analysis. The crude residue was purified by silica gel flash chromatography to afford the polyborylated product.

#### General procedure for the transition metal-free 1,2,3-triboration

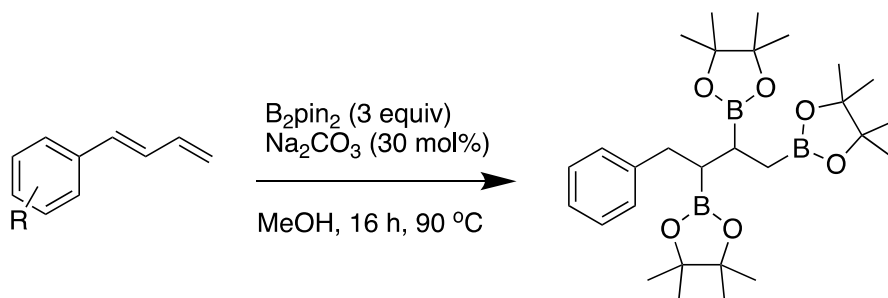

To an oven-dried Schlenk-flask equipped with a magnetic stir bar,  $B_2pin_2$  (1.50 mmol, 3 equiv), sodium carbonate (0.15 mmol, 0.3 equiv), dry MeOH as solvent (1 mL), and the substrate (0.5 mmol, 1 equiv) were added. The vial was sealed with a plastic cap and heated to 90°C in an oil bath for 16 hours. Upon completion, the reaction mixture was concentrated under reduced pressure and a known amount of naphthalene (ca. 10 mg) as internal standard was added. An aliquot was taken to determine the conversion and selectivity by  $^1H$  NMR and GC-MS analysis. The crude residue was purified by silica gel flash chromatography to afford the triborated product.

Spectral data of organoboron compounds:

**4,4,5,5-tetramethyl-2-(4-phenylbut-2-en-1-yl)-1,3,2-dioxaborolane (2)**

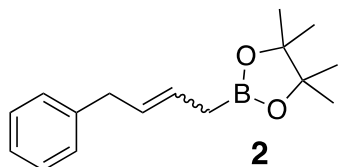

The product was purified by flash column chromatography using pentane:ethyl acetate (20:1) as eluent. The product **2** was obtained as a colourless liquid (52 mg, 40%) (*E*:*Z* = 3:1).

**<sup>1</sup>H NMR (400 MHz, CDCl<sub>3</sub>)**  $\delta$  = (*E*) 7.35 – 7.13 (m, 5H), 5.70 – 5.51 (m, 2H), 3.44 – 3.36 (d, *J* = 6.5 Hz, 2H), 1.80 (d, *J* = 7.6 Hz, 2H). (*Z*) 7.35 – 7.13 (m, 5H), 5.70 – 5.51 (m, 2H), 3.33 (d, *J* = 5.5 Hz, 2H), 1.69 (d, *J* = 5.8 Hz, 2H), 1.25 (s, 12H).

**<sup>13</sup>C NMR (100 MHz, CDCl<sub>3</sub>)**  $\delta$  = 141.3, 132.8, 128.5, 128.3, 128.3, 128.1, 126.7, 125.9, 125.8, 125.3, 83.3, 83.1, 39.2, 33.3, 27.4, 24.9, 24.8, 24.6.

**<sup>11</sup>B NMR (128 MHz, CDCl<sub>3</sub>)**  $\delta$  = 33.01.

**HRMS-(ESI<sup>+</sup>) for C<sub>16</sub>H<sub>23</sub>BO<sub>2</sub> [M]<sup>+</sup>**: calculated: 258.1791, found: 258.1786.

**2,3',2''-(4-phenylbutane-1,2,3-triyl)tris(4,4,5,5-tetramethyl-1,3,2-dioxaborolane) (3)**

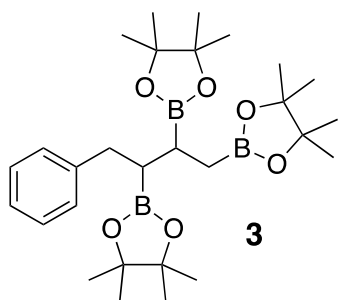

The product was purified by flash column chromatography using pentane:ethyl acetate (10:1) as eluent. The product **3** was obtained as a colourless liquid (182 mg, 71%)

**<sup>1</sup>H NMR (400 MHz, CDCl<sub>3</sub>)** δ = 7.20 (m, 4H), 7.08 (m, 1H), 2.72 (m, 2H), 1.50 (m, 1H), 1.31 (m, 1H), 1.21-1.19 (m, 24H), 1.10 (s, 6H), 1.08 (s, 6H), 0.91-0.78 (m, 2H).

**<sup>13</sup>C NMR (100 MHz, CDCl<sub>3</sub>)** δ = 143.0, 129.1, 129.1, 127.8, 127.8, 125.2, 82.8, 82.8, 82.7, 36.3, 24.9.

**<sup>11</sup>B NMR (128 MHz, CDCl<sub>3</sub>)** δ = 33.15 (br s).

**HRMS-(ESI<sup>+</sup>) for NaC<sub>28</sub>H<sub>47</sub>B<sub>3</sub>O<sub>6</sub> [M+Na]<sup>+</sup>**: calculated: 535.3549, found: 535.3549.

**(E)-2,2'-(pent-3-ene-1,2-diyl)bis(4,4,5,5-tetramethyl-1,3,2-dioxaborolane) (5)**

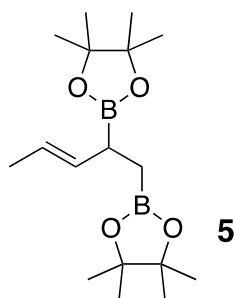

The product was purified by flash column chromatography using pentane:ethyl acetate (20:1) as eluent. The product **5** was obtained as a colourless oil (41.2 mg, 33%).

**<sup>1</sup>H NMR (400 MHz, CDCl<sub>3</sub>)** δ = 5.49 (ddd, *J* = 15.3, 7.6, 1.5 Hz, 1H), 5.41 – 5.30 (m, 1H), 1.90 (m, 1H), 1.61 (d, *J* = 6.2 Hz, 3H), 1.20 (s, 24H), 0.98 (dd, *J* = 15.9, 9.2 Hz, 1H), 0.87 (dd, *J* = 15.9, 6.3 Hz, 1H).

**<sup>13</sup>C NMR (100 MHz, CDCl<sub>3</sub>)** δ = 133.6, 122.7, 83.0, 82.9, 82.8, 28.6, 25.7, 24.9, 24.8, 24.7, 18.2.

**<sup>11</sup>B NMR (128 MHz, CDCl<sub>3</sub>)** δ = 33.41 (br s)

**HRMS-(ESI<sup>+</sup>) for C<sub>17</sub>H<sub>33</sub>B<sub>2</sub>O<sub>4</sub> [M+H]<sup>+</sup>**: calculated: 323.2565, found: 323.2562.

**2,2',2'',2'''-(pentane-1,2,3,4-tetrayl)tetrakis(4,4,5,5-tetramethyl-1,3,2-dioxaborolane) (6)**

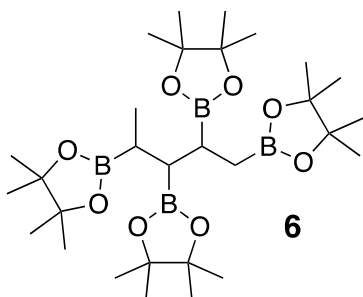

The product was purified by flash column chromatography using pentane:ethyl acetate (10:1) as eluent. The product **6** was obtained as a colourless oil (68.7 mg, 52%).

**<sup>1</sup>H NMR (400 MHz, CDCl<sub>3</sub>)** δ = 1.39 (m, 1H), 1.16 – 1.13 (m, 24H), 1.12 (s, 12H), 1.10 (s, 12H), 0.89 (d, *J* = 7.2 Hz, 2H), 0.82 (d, *J* = 7.2 Hz, 3H), 0.59 – 0.54 (m, 1H).

**<sup>13</sup>C NMR (100 MHz, CDCl<sub>3</sub>)** δ = 82.89, 82.6, 82.5, 82.4, 25.2, 25.1, 25.0, 24.9, 24.8, 24.7, 24.6, 15.0, 13.9.

**<sup>11</sup>B NMR (128 MHz, CDCl<sub>3</sub>)** δ = 34.02 (br s).

**HRMS-(ESI<sup>+</sup>) for C<sub>29</sub>H<sub>57</sub>B<sub>4</sub>O<sub>8</sub> [M+H]<sup>+</sup>**: calculated: 577.4426, found: 577.4432.

### 2,2',2''-(4-(4-chlorophenyl)butane-1,2,3-triyl)tris(4,4,5,5-tetramethyl-1,3,2-

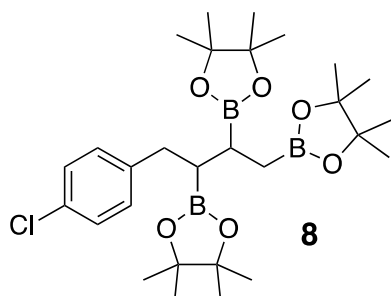

### dioxaborolane) (**8**)

The product was purified by flash column chromatography using pentane:ethyl acetate (20:1) as eluent. The product **8** was obtained as a white solid (108.6 mg, 50%).

**<sup>1</sup>H NMR (400 MHz, CDCl<sub>3</sub>)** δ = 7.13 – 7.03 (m, 4H), 2.73 – 2.53 (m, 2H), 1.44 – 1.33 (m, 1H), 1.23 – 1.12 (m, 24H), 1.05 (s, 6H), 1.03 (s, 6H), 0.96 – 0.72 (m, 2H).

**<sup>13</sup>C NMR (100 MHz, CDCl<sub>3</sub>)** δ = 141.7, 130.9, 130.5, 127.9, 82.9, 82.9, 35.8, 35.5, 25.0, 24.9, 24.7.

**<sup>11</sup>B NMR (128 MHz, CDCl<sub>3</sub>)** δ = 33.48 (br s).

**HRMS-(ESI<sup>+</sup>) for C<sub>28</sub>H<sub>47</sub>B<sub>3</sub>ClO<sub>6</sub> [M+H]<sup>+</sup>**: calculated: 547.3340, found: 547.3335.

***N,N*-dimethyl-4-(2,3,4-tris(4,4,5,5-tetramethyl-1,3,2-dioxaborolan-2-**

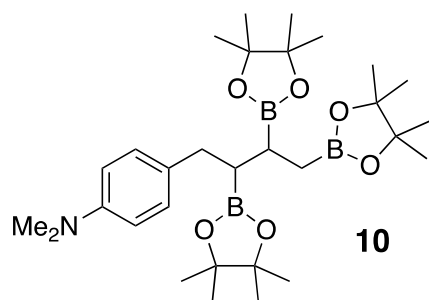

**yl)butyl)aniline (10)**

The product was purified by flash column chromatography using pentane:ethyl acetate (10:1) as eluent. The product **10** was obtained as a yellow liquid (162 mg, 60%)

**<sup>1</sup>H NMR (400 MHz, CDCl<sub>3</sub>)**  $\delta$  = 7.12 – 7.05 (m, 2H), 6.64 (dd, *J* = 8.8, 2.4 Hz, 2H), 2.85 (s, 6H), 2.73 – 2.56 (m, 2H), 1.45 (dd, *J* = 9.8, 6.1 Hz, 1H), 1.37-1.27 (m, 1H) 1.29 – 1.17 (m, 24H), 1.15 (s, 6H), 1.04 (s, 6H), 0.99 – 0.78 (m, 2H).

**<sup>13</sup>C NMR (100 MHz, CDCl<sub>3</sub>)**  $\delta$  = 149.0, 132.0, 129.7, 129.6, 110.1, 82.7, 82.6, 41.2, 35.3, 25.0, 24.9, 24.8, 24.7.

**<sup>11</sup>B NMR (128 MHz, CDCl<sub>3</sub>)**  $\delta$  = 33.27 (br s).

**HRMS-(APCI+)** for C<sub>30</sub>H<sub>53</sub>B<sub>3</sub>NO<sub>6</sub> [**M+H**]<sup>+</sup>: calculated: 556.4152, found: 556.4151.

**2,2',2''-(4-(*p*-tolyl)butane-1,2,3-triyl)tris(4,4,5,5-tetramethyl-1,3,2-dioxaborolane)**

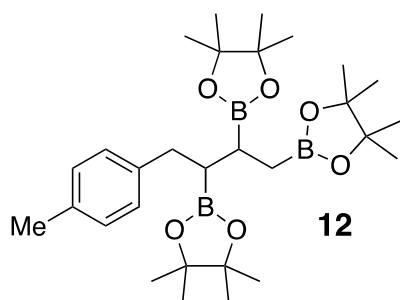

**(12)**

The product was synthesized according to the general procedure. The product was purified by flash column chromatography using pentane:ethyl acetate (20:1) as eluent. The product **12** was obtained as a colourless liquid (168 mg, 65%)



**<sup>1</sup>H NMR (400 MHz, CDCl<sub>3</sub>)** δ = 7.04 (dd, *J* = 7.8, 5.3 Hz, 2H), 6.94 (d, *J* = 7.7 Hz, 2H), 2.73 – 2.53 (m, 2H), 2.20 (s, 3H), 1.48 – 1.34 (m, 1H), 1.18 – 1.10 (m, 24H), 1.09 (s, 6H), 0.97 (s, 6H), 0.97 – 0.71 (m, 2H).

**<sup>13</sup>C NMR (100 MHz, CDCl<sub>3</sub>)** δ = 140.0, 139.9, 134.5, 129.0, 128.5, 83.5, 82.8, 82.7, 36.0, 35.7, 25.1, 25.0, 24.9, 24.8, 24.7, 21.0.

**<sup>11</sup>B NMR (128 MHz, CDCl<sub>3</sub>)** δ = 35.53 (br s).

**HRMS-(ESI<sup>+</sup>) for C<sub>29</sub>H<sub>49</sub>NaB<sub>3</sub>O<sub>6</sub> [M+Na<sup>+</sup>]<sup>+</sup>**: calculated: 549.3706, found: 549.3717.

### 2,2',2''-(4-(4-methoxyphenyl)butane-1,2,3-triyl)tris(4,4,5,5-tetramethyl-1,3,2-

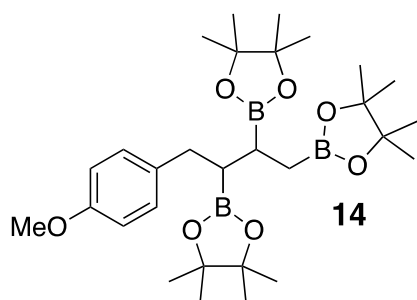

### dioxaborolane) (14)

The product was synthesized according to the general procedure. The product was purified by flash column chromatography using pentane:ethyl acetate (20:1) as eluent. The product **14** was obtained as a colourless liquid (162 mg, 60%)

**<sup>1</sup>H NMR (400 MHz, CDCl<sub>3</sub>)** δ = 7.07 (dd, *J* = 8.4, 4.9 Hz, 2H), 6.69 (d, *J* = 8.6 Hz, 2H), 3.69 (s, 3H), 2.71 – 2.52 (m, 2H), 1.39 (m, 1H), 1.33 – 1.21 (m, 1H), 1.19 – 1.10 (m, 24H), 1.09 (s, 6H), 0.97 (s, 6H), 0.96 – 0.75 (m, 2H).

**<sup>13</sup>C NMR (100 MHz, CDCl<sub>3</sub>)** δ = 157.4, 135.3, 135.2, 130.0, 113.3, 82.7, 55.3, 35.5, 29.7, 25.0, 24.9.

**<sup>11</sup>B NMR (128 MHz, CDCl<sub>3</sub>)** δ = 34.00 (br s).

**HRMS-(ESI<sup>+</sup>) for C<sub>29</sub>H<sub>49</sub>NaB<sub>3</sub>O<sub>7</sub> [M+Na<sup>+</sup>]<sup>+</sup>**: calculated: 565.3655, found: 565.3666.

**2,2',2''-(4-(2-methoxyphenyl)butane-1,2,3-triyl)tris(4,4,5,5-tetramethyl-1,3,2-**

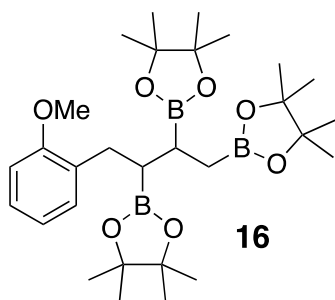

**dioxaborolane) (16)**

The product was synthesized according to the general procedure. The product was purified by flash column chromatography using pentane:ethyl acetate (20:1) as eluent. The product **16** was obtained as a colourless liquid (177 mg, 65%).

**<sup>1</sup>H NMR (400 MHz, CDCl<sub>3</sub>)**  $\delta$  = 7.14 (m, 1H), 7.02 (m, 1H), 6.78 – 6.65 (m, 2H), 3.70 (s, 3H), 2.80 – 2.58 (m, 2H), 1.58 – 1.45 (m, 1H), 1.19 (m, 1H), 1.19 – 1.12 (m, 24H), 1.05 (m, 6H), 1.01 (m, 6H), 0.97 – 0.83 (m, 2H).

**<sup>13</sup>C NMR (100 MHz, CDCl<sub>3</sub>)**  $\delta$  = 157.8, 131.3, 130.7, 126.4, 119.8, 109.9, 82.8, 55.1, 30.0, 25.0, 24.9.

**<sup>11</sup>B NMR (128 MHz, CDCl<sub>3</sub>)**  $\delta$  = 33.17 (br s).

**HRMS-(ESI<sup>+</sup>) for C<sub>29</sub>H<sub>49</sub>NaB<sub>3</sub>O<sub>7</sub> [M+Na<sup>+</sup>]<sup>+</sup>**: calculated: 565.3662, found: 565.3655.

**2,2',2''-(4-(furan-2-yl)butane-1,2,3-triyl)tris(4,4,5,5-tetramethyl-1,3,2-**

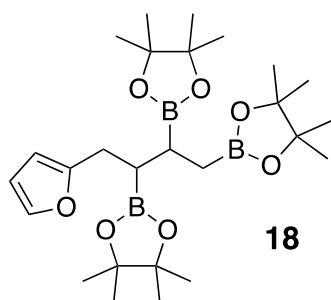

**dioxaborolane) (18)**

The product was purified by flash column chromatography using pentane:ethyl acetate (20:1) as eluent. The product **18** was obtained as a white solid (160.6 mg, 64%).

**<sup>1</sup>H NMR (400 MHz, CDCl<sub>3</sub>)** δ = 7.19 – 7.13 (s, 1H), 6.17 – 6.10 (m, 1H), 5.93 – 5.85 (m, 1H), 2.76 (dd, *J* = 15.0, 10.2 Hz, 1H), 2.62 (dd, *J* = 15.1, 5.9 Hz, 1H), 1.57 – 1.45 (m, 1H), 1.25 (dt, *J* = 11.8, 4.8 Hz, 1H), 1.15 (m, 24H), 1.09 (m, 12H), 0.93 – 0.70 (m, 2H).

**<sup>13</sup>C NMR (100 MHz, CDCl<sub>3</sub>)** δ = 157.0, 140.2, 109.9, 104.9, 83.5, 83.0, 82.9, 28.5, 25.0, 24.9, 24.8, 24.7.

**<sup>11</sup>B NMR (128 MHz, CDCl<sub>3</sub>)** δ = 33.74 (br s), 30.45 (s)

**HRMS-(APCI+)** for C<sub>26</sub>H<sub>46</sub>B<sub>3</sub>O<sub>7</sub> [M+H]<sup>+</sup>: calculated: 503.3523, found: 503.3517.

### 3-(2,3,4-tris(4,4,5,5-tetramethyl-1,3,2-dioxaborolan-2-yl)butyl)pyridine (20)

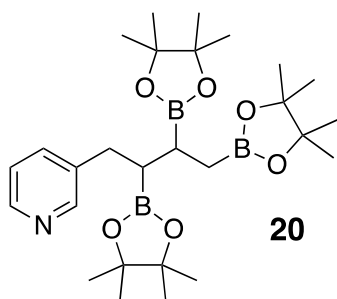

The product was synthesized according to the general procedure. The product was purified by flash column chromatography using pentane:ethyl acetate (1:1) as eluent. The product **20** was obtained as a colourless liquid (20 mg, 10%)

**<sup>1</sup>H NMR (400 MHz, CDCl<sub>3</sub>)** δ = 8.45 (m, 1H), 8.35 (m, 1H), 7.52 – 7.45 (m, 1H), 7.08 (dd, *J* = 7.8, 4.8 Hz, 1H), 2.71 (dd, *J* = 13.6, 10.1 Hz, 1H), 2.61 (dd, *J* = 13.6, 6.1 Hz, 1H), 1.42 (dt, *J* = 10.2, 5.6 Hz, 1H), 1.29 – 1.22 (m, 1H), 1.16 (m, 24H), 1.04 (s, 6H), 1.03 (s, 6H), 0.96 – 0.73 (m, 2H).

**<sup>13</sup>C NMR (100 MHz, CDCl<sub>3</sub>)** δ = 150.3, 145.4, 130.7, 86.8, 85.7, 35.9, 28.7, 23.9, 23.7, 23.4.

**<sup>11</sup>B NMR (128 MHz, CDCl<sub>3</sub>)** δ = 34.23 (br s), 22.49 (s)

**HRMS-(APCI+)** for C<sub>27</sub>H<sub>47</sub>B<sub>3</sub>NO<sub>6</sub> [M+H]<sup>+</sup>: calculated: 514.3683, found: 514.3677 .

**2,2',2''-(4,4-diphenylbutane-1,2,3-triyl)tris(4,4,5,5-tetramethyl-1,3,2-**

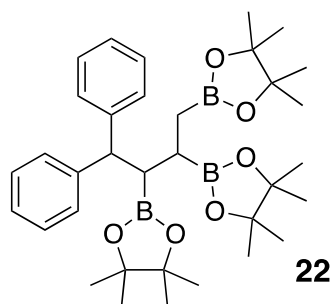

**dioxaborolane) (22)**

The product was purified by flash column chromatography using pentane:ethyl acetate (20:1) as eluent. The product **22** was obtained as a colourless oil (138.2 mg, 47%).

**<sup>1</sup>H NMR (400 MHz, CDCl<sub>3</sub>)**  $\delta$  = 7.40 – 7.30 (m, 2H), 7.28 – 7.17 (m, 2H), 7.17 – 7.03 (m, 4H), 7.03 – 6.90 (m, 2H), 4.33 (d,  $J$  = 12.6 Hz, 1H), 2.06 (dd,  $J$  = 12.7, 5.0 Hz, 1H), 1.25 (s, 6H), 1.15 (s, 6H), 1.12 (s, 12H), 1.07 (d,  $J$  = 7.9 Hz, 2H), 0.84 (s, 6H), 0.81 (s, 6H), 0.63 (dd,  $J$  = 16.2, 5.9 Hz, 1H).

**<sup>13</sup>C NMR (100 MHz, CDCl<sub>3</sub>)**  $\delta$  = 146.7, 128.4, 128.3, 128.1, 125.7, 125.5, 82.8, 82.7, 82.6, 51.8, 29.7, 25.5, 25.1, 24.8, 24.7, 24.4.

**<sup>11</sup>B NMR (128 MHz, CDCl<sub>3</sub>)**  $\delta$  = 38.86 (br s).

**HRMS-(APCI+)** for C<sub>34</sub>H<sub>52</sub>B<sub>3</sub>O<sub>6</sub> [M+H]<sup>+</sup>: calculated: 589.4043, found: 589.4038.

**2,2',2''-(1-phenylpentane-2,3,4-triyl)tris(4,4,5,5-tetramethyl-1,3,2-dioxaborolane)**

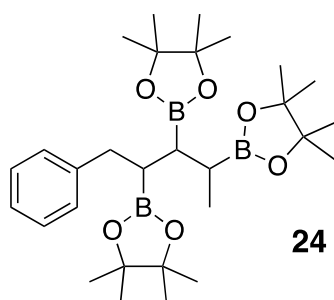

**(24)**

The product was purified by flash column chromatography using pentane:ethyl acetate (10:1) as eluent. The product **24** was obtained as a colourless oil (79 mg, 30%).

**<sup>1</sup>H NMR (400 MHz, CDCl<sub>3</sub>)** δ = 7.21 – 7.09 (m, 4H), 7.07 – 6.99 (m, 1H), 2.83 (ddd, *J* = 13.5, 5.9, 2.7 Hz, 1H), 2.49 (ddd, *J* = 47.0, 13.3, 10.8 Hz, 1H), 1.60 (m, 1H), 1.44 – 1.24 (m, 2H), 1.16 (m, 24H), 1.09 (s, 6H), 0.98 (s, 6H), 0.83 (m, 3H).

**<sup>13</sup>C NMR (100 MHz, CDCl<sub>3</sub>)** δ = 143.3, 142.7, 129.2, 127.8, 125.3, 125.3, 83.0, 82.6, 36.7, 36.5, 25.1, 25.0, 24.8, 24.7, 15.1, 12.9.

**<sup>11</sup>B NMR (128 MHz, CDCl<sub>3</sub>)** δ = 33.64 (br s).

**HRMS-(ESI+)** for C<sub>29</sub>H<sub>49</sub>B<sub>3</sub>NaO<sub>6</sub> [**M+Na**]<sup>+</sup>: calculated: 549.3711, found: 549.3706.

**2,2',2''-(1-(4-chlorophenyl)pentane-2,3,4-triyl)tris(4,4,5,5-tetramethyl-1,3,2-dioxaborolane) (26)**

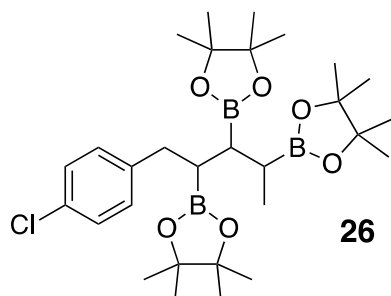

The product was purified by flash column chromatography using pentane:ethyl acetate (20:1) as eluent. The product **26** was obtained as a colourless oil (56 mg, 20%).

**<sup>1</sup>H NMR (400 MHz, CDCl<sub>3</sub>)** δ = 7.10 (m, 4H), 2.74 (dd, *J* = 13.4, 6.1 Hz, 1H), 2.45 (dd, *J* = 13.6, 10.3 Hz, 1H), 1.49 (m, 1H), 1.31 (m, 1H), 1.16 (d, *J* = 4.9 Hz, 24H), 1.05 (s, 6H), 0.97 (s, 6H), 0.87 (d, *J* = 7.0 Hz, 3H).

**<sup>13</sup>C NMR (100 MHz, CDCl<sub>3</sub>)** δ = 141.9, 141.3, 130.9, 130.5, 127.9, 83.0, 82.7, 53.5, 35.9, 29.7, 25.2, 24.8, 15.1, 13.2.

**<sup>11</sup>B NMR (128 MHz, CDCl<sub>3</sub>)** δ = 33.00 (br s).

**HRMS-(ESI+)** for C<sub>29</sub>H<sub>48</sub>B<sub>3</sub>ClNaO<sub>6</sub> [**M+Na**]<sup>+</sup>: calculated: 583.3316, found: 583.3339.

***N,N*-dimethyl-4-(2,3,4-tris(4,4,5,5-tetramethyl-1,3,2-dioxaborolan-2-**

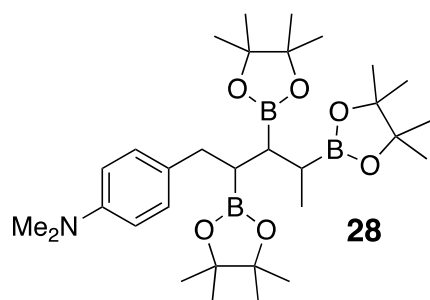

**yl)pentyl)aniline (28)**

The product was purified by flash column chromatography using pentane:ethyl acetate (10:1) as eluent. The product **28** was obtained as a colourless oil (81.4 mg, 30%).

**<sup>1</sup>H NMR (400 MHz, CDCl<sub>3</sub>)**  $\delta$  = 7.04 (d, *J* = 8.5 Hz, 2H), 6.63 (d, *J* = 7.9 Hz, 2H), 2.80 (s, 6H), 2.74 (dd, *J* = 13.5, 5.9 Hz, 1H), 2.37 (dd, *J* = 13.6, 10.5 Hz, 1H), 1.49 (m, 1H), 1.41 – 1.30 (m, 2H), 1.19 (s, 12H), 1.11 (s, 12H), 1.04 (s, 6H), 0.94 (s, 6H), 0.88 (d, *J* = 7.1 Hz, 3H).

**<sup>13</sup>C NMR (100 MHz, CDCl<sub>3</sub>)**  $\delta$  = 129.7, 113.6, 113.6, 82.9, 82.5, 41.6, 35.4, 29.7, 25.0, 24.8, 12.9.

**<sup>11</sup>B NMR (128 MHz, CDCl<sub>3</sub>)**  $\delta$  = 34.98 (br s).

**HRMS-(ESI<sup>+</sup>) for C<sub>31</sub>H<sub>55</sub>B<sub>3</sub>NO<sub>6</sub> [M+H]<sup>+</sup>**: calculated: 570.4309, found: 570.4311.

**2,2',2''-(3-methyl-4-phenylbutane-1,2,3-triyl)tris(4,4,5,5-tetramethyl-1,3,2-**

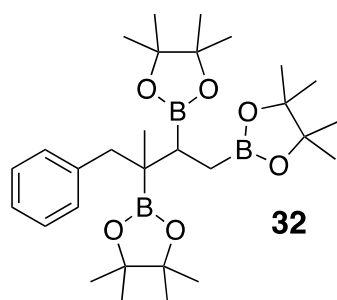

**dioxaborolane) (32)**

The product was purified by flash column chromatography using pentane:ethyl acetate (10:1) as eluent. The product **32** was obtained as a colourless oil (126.7 mg, 48%).

**<sup>1</sup>H NMR (400 MHz, CDCl<sub>3</sub>)** δ = 7.18 (dd, *J* = 8.3, 1.4 Hz, 2H), 7.15 – 7.08 (m, 2H), 7.08 – 7.01 (m, 1H), 2.88 (d, *J* = 12.9 Hz, 1H), 2.45 (d, *J* = 12.9 Hz, 1H), 1.26 (dd, *J* = 12.4, 3.5 Hz, 1H), 1.21 – 1.14 (m, 24H), 1.12 (s, 6H), 1.03 (s, 6H), 0.95 (m, 2H), 0.85 (s, 3H)

**<sup>13</sup>C NMR (100 MHz, CDCl<sub>3</sub>)** δ = 141.3, 130.7, 127.4, 125.4, 83.0, 82.9, 82.7, 43.5, 25.3, 25.1, 25.0, 24.9, 24.7, 20.4.

**<sup>11</sup>B NMR (128 MHz, CDCl<sub>3</sub>)** δ = 33.09 (br s).

**HRMS-(ESI+)** for C<sub>29</sub>H<sub>49</sub>NaB<sub>3</sub>O<sub>6</sub> [M+Na]<sup>+</sup>: calculated: 549.3706, found: 549.3716.

## General Procedure for the Suzuki-Miyaura Cross-Coupling Reaction:<sup>2</sup>

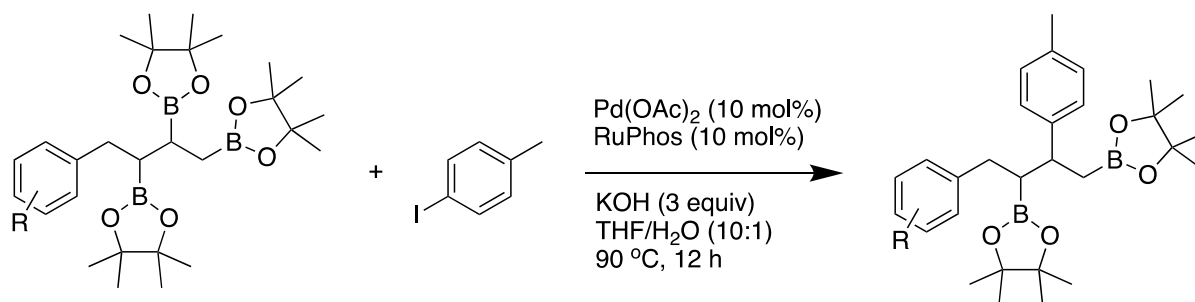

To a Schlenk flask equipped with a stirrer bar was added the substrate (1 equiv, 0.3 mmol), 4-iodotoluene (1.5 equiv, 0.45 mmol) and solid potassium hydroxide (3 equiv, 0.9 mmol). The flask was then sealed and flushed three times with argon before being taken to the glovebox where palladium acetate (10 mol%) and Ruphos (10 mol%) were added. The flask was once again sealed. The sealed flask was taken from the glovebox and dry THF (3.5 mL) and water, sparged for thirty minutes with argon (0.35 mL), were added. The reaction was heated to 90 °C and left to stir for 12 hours.



Spectral Data for Suzuki-Miyaura Cross-Coupling Products:

**2,2'-(4-phenyl-2-(*p*-tolyl)butane-1,3-diyl)bis(4,4,5,5-tetramethyl-1,3,2-dioxaborolane) (36)**

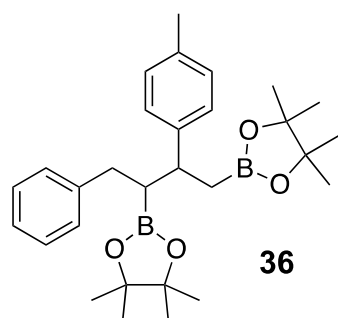

**<sup>1</sup>H NMR (400 MHz, CDCl<sub>3</sub>)** δ = 7.19 – 7.05 (m, 4H), 7.05 – 6.96 (m, 3H), 6.79 – 6.71 (m, 2H), 3.70 (s, 3H), 2.86 (ddd, J = 11.8, 10.3, 4.7 Hz, 1H), 2.46 – 2.28 (m, 2H), 1.59 (td, J = 10.9, 5.8 Hz, 1H), 1.18 – 1.08 (m, 2H), 1.02 (s, 6H), 0.94 (s, 6H), 0.92 (s, 12H).  
**<sup>13</sup>C NMR (100 MHz, CDCl<sub>3</sub>)** δ = 157.8, 142.2, 138.9, 128.8, 127.9, 125.4, 113.4, 83.0, 82.8, 55.3, 42.8, 36.6, 29.7, 25.0, 24.7, 24.5.  
**<sup>11</sup>B NMR (128 MHz, CDCl<sub>3</sub>)** δ = 39.26 (br s).

**HRMS-(ESI+)** for C<sub>29</sub>H<sub>42</sub>B<sub>2</sub>O<sub>5</sub>Na [M+Na]<sup>+</sup>: calculated: 515.3118, found: 515.3166.

**2,2'-(4-(4-methoxyphenyl)-2-(*p*-tolyl)butane-1,3-diyl)bis(4,4,5,5-tetramethyl-1,3,2-dioxaborolane) (38)**

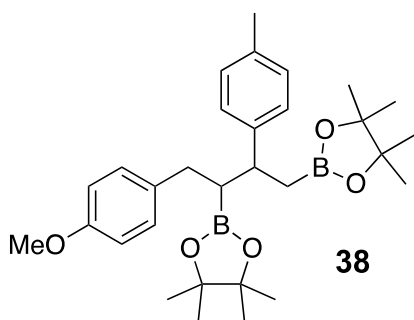

The product was synthesised according to the general procedure. The product was purified by flash column chromatography using pentane:ethyl acetate (20:1) as eluent. The product **38** was obtained as a colourless oil (20 mg, 20%).

**<sup>1</sup>H NMR (400 MHz, CDCl<sub>3</sub>)** δ = 7.07 (d, J = 8.1 Hz, 2H), 6.98 (d, J = 7.8 Hz, 2H), 6.94 (d, J = 8.6 Hz, 2H), 6.64 (d, J = 8.6 Hz, 2H), 3.66 (s, 3H), 2.85 (ddd, J = 11.7, 10.3, 4.6 Hz, 1H), 2.35 – 2.27 (m, 2H), 2.21 (s, 3H), 1.59 (dt, J = 10.6, 5.3 Hz, 1H), 1.19 (m, 2H), 1.03 (s, 6H), 0.95 (s, 6H), 0.91 (s, 12H).

**<sup>13</sup>C NMR (100 MHz, CDCl<sub>3</sub>)** δ = 157.5, 143.5, 135.1, 134.4, 129.7, 128.6, 127.8, 113.3, 83.0, 82.7, 55.3, 43.1, 35.7, 25.0, 24.8, 24.6, 24.5, 21.1.

**<sup>11</sup>B NMR (128 MHz, CDCl<sub>3</sub>)** δ = 32.56 (br s).

**HRMS-(ESI+)** for C<sub>30</sub>H<sub>44</sub>B<sub>2</sub>O<sub>5</sub>Na [M+Na]<sup>+</sup>: calculated: 529.3275, found: 529.3272.

**2,2'-(4-(2-methoxyphenyl)-2-(*p*-tolyl)butane-1,3-diyl)bis(4,4,5,5-tetramethyl-1,3,2-dioxaborolane) (39)**

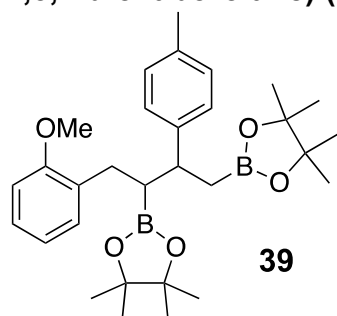

The product was synthesised according to the general procedure. The product was purified by flash column chromatography using pentane:ethyl acetate (20:1) as eluent. The product **39** was obtained as a colourless oil (11 mg, 11% (40% by NMR)).

**<sup>1</sup>H NMR (400 MHz, CDCl<sub>3</sub>)**  $\delta$  = 7.10 (d, *J* = 8.0 Hz, 2H), 7.03 (dd, *J* = 7.3, 1.9 Hz, 1H), 6.99 – 6.94 (m, 3H), 6.72 – 6.60 (m, 2H), 3.64 (s, 3H), 2.94 – 2.82 (m, 1H), 2.43 – 2.35 (m, 2H), 2.21 (s, 3H), 1.75 (td, *J* = 9.8, 7.2 Hz, 1H), 1.13 – 1.08 (m, 2H), 1.04 (s, 6H), 0.95 (s, 6H), 0.92 (s, 12H).

**<sup>13</sup>C NMR (100 MHz, CDCl<sub>3</sub>)**  $\delta$  = 157.6, 143.7, 134.9, 130.8, 130.3, 129.4, 128.4, 128.0, 126.8, 126.6, 119.8, 110.0, 82.8, 82.7, 55.1, 43.3, 31.0, 29.7, 25.1, 24.8, 24.7, 24.6, 21.1.

**<sup>11</sup>B NMR (128 MHz, CDCl<sub>3</sub>)**  $\delta$  = 30.48 (br s).

**HRMS-(ESI<sup>+</sup>) for C<sub>30</sub>H<sub>44</sub>B<sub>2</sub>O<sub>5</sub>Na [M+Na<sup>+</sup>]<sup>+</sup>**: calculated: 529.3273, found: 529.3272.

**4-phenyl-2-(*p*-tolyl)butane-1,3-diol (40)**

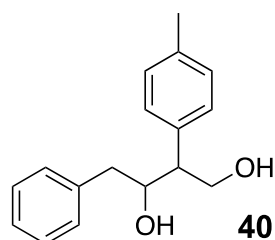

The product was synthesised according to an adapted version of the general procedure using an oxidative workup (H<sub>2</sub>O<sub>2</sub>/NaOH) upon completion of the reaction. The product was purified by flash column chromatography using pentane:ethyl acetate

(2:1) as eluent. The product **40** was obtained as a colourless oil (12 mg, 15% (20% by NMR)).

**<sup>1</sup>H NMR (400 MHz, CDCl<sub>3</sub>)**  $\delta$  = 7.30 – 7.13 (m, 4H), 7.13 – 6.99 (m, 5H), 4.14 (td, *J* = 9.5, 2.7 Hz, 1H), 4.00 (dd, *J* = 11.1, 7.9 Hz, 1H), 3.77 (dd, *J* = 11.1, 4.4 Hz, 1H), 2.93 (br s, 1H), 2.81 (ddd, *J* = 9.4, 7.9, 4.5 Hz, 1H), 2.64 (dd, *J* = 13.8, 2.7 Hz, 1H), 2.41 (dd, *J* = 13.8, 9.6 Hz, 1H), 2.28 (s, 3H), 1.55 (br s, 1H).

**<sup>13</sup>C NMR (100 MHz, CDCl<sub>3</sub>)**  $\delta$  = 138.0, 136.8, 136.8, 129.7, 129.4, 128.7, 128.1, 126.7, 67.3, 53.1, 42.5, 24.9, 21.1.

**HRMS-(ESI<sup>+</sup>) for C<sub>17</sub>H<sub>20</sub>O<sub>2</sub> [M]<sup>+</sup>**: calculated: 256.1463, found: 256.1465.

**2,2'-(4-(furan-2-yl)-2-(*p*-tolyl)butane-1,3-diyl)bis(4,4,5,5-tetramethyl-1,3,2-dioxaborolane) (**41**)**

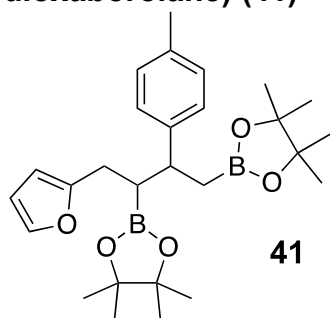

The product was synthesised according to the general procedure. The product was purified by flash column chromatography using pentane:ethyl acetate (20:1) as eluent. The product **41** was obtained as a colourless oil (40 mg, 29% (50% by NMR)).

**<sup>1</sup>H NMR (400 MHz, CDCl<sub>3</sub>)**  $\delta$  = 7.13 (d, *J* = 1.8 Hz, 1H), 7.04 (d, *J* = 8.0 Hz, 2H), 6.97 (d, *J* = 7.9 Hz, 2H), 6.10 (dd, *J* = 3.2, 1.9 Hz, 1H), 5.83 (d, *J* = 3.1 Hz, 1H), 2.85 (td, *J* = 10.2, 6.4 Hz, 1H), 2.45 (dd, *J* = 15.1, 11.6 Hz, 1H), 2.32 (dd, *J* = 15.2, 4.6 Hz, 1H), 2.20 (s, 3H), 1.67 – 1.54 (m, 1H), 1.19 (m, 2H), 1.10 (s, 12H), 0.90 (s, 12H).

**<sup>13</sup>C NMR (100 MHz, CDCl<sub>3</sub>)**  $\delta$  = 156.1, 140.4, 135.2, 128.6, 127.8, 109.8, 105.0, 83.1, 82.8, 42.5, 28.7, 24.9, 24.6, 21.0.

**<sup>11</sup>B NMR (128 MHz, CDCl<sub>3</sub>)**  $\delta$  = 33.03 (br s).

**HRMS-(ESI<sup>+</sup>) for C<sub>27</sub>H<sub>40</sub>B<sub>2</sub>O<sub>5</sub>Na [M+Na]<sup>+</sup>**: calculated: 489.2953, found: 489.2959

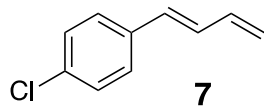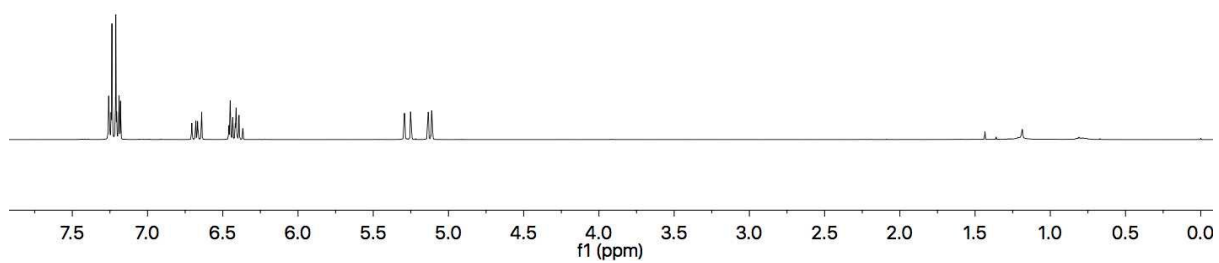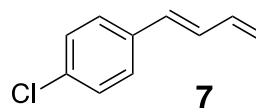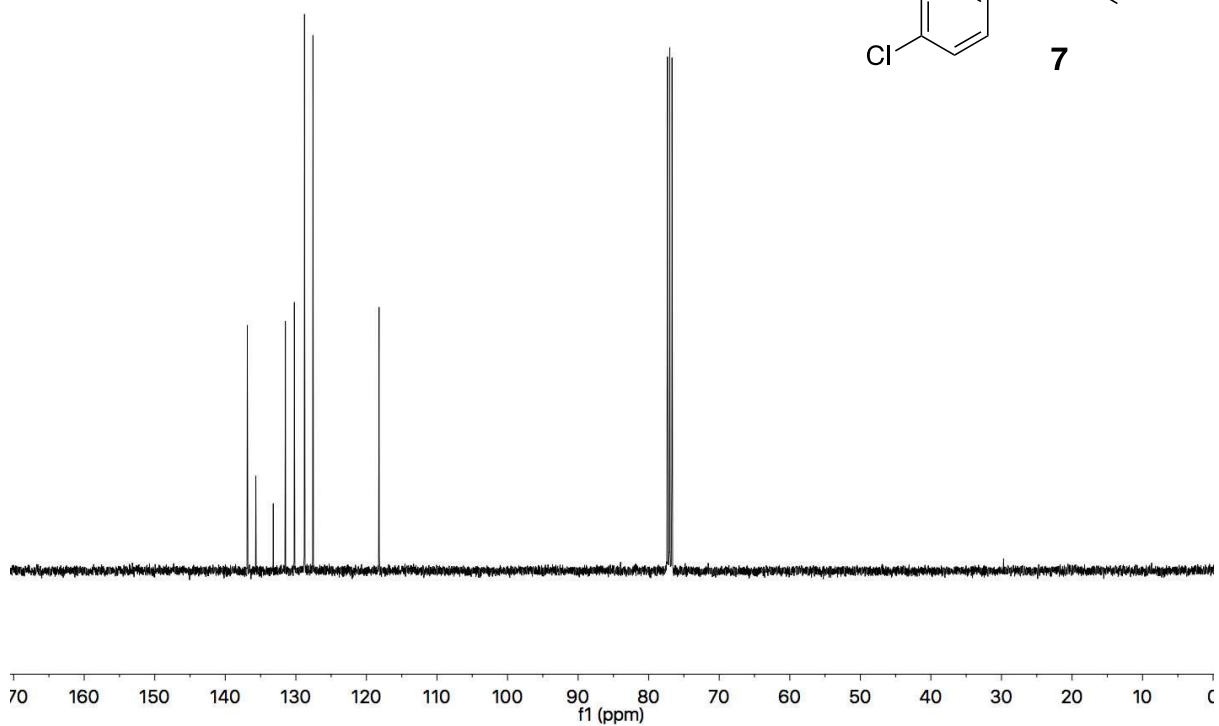

Spectra for 1,3-dienes:

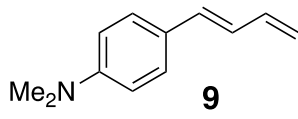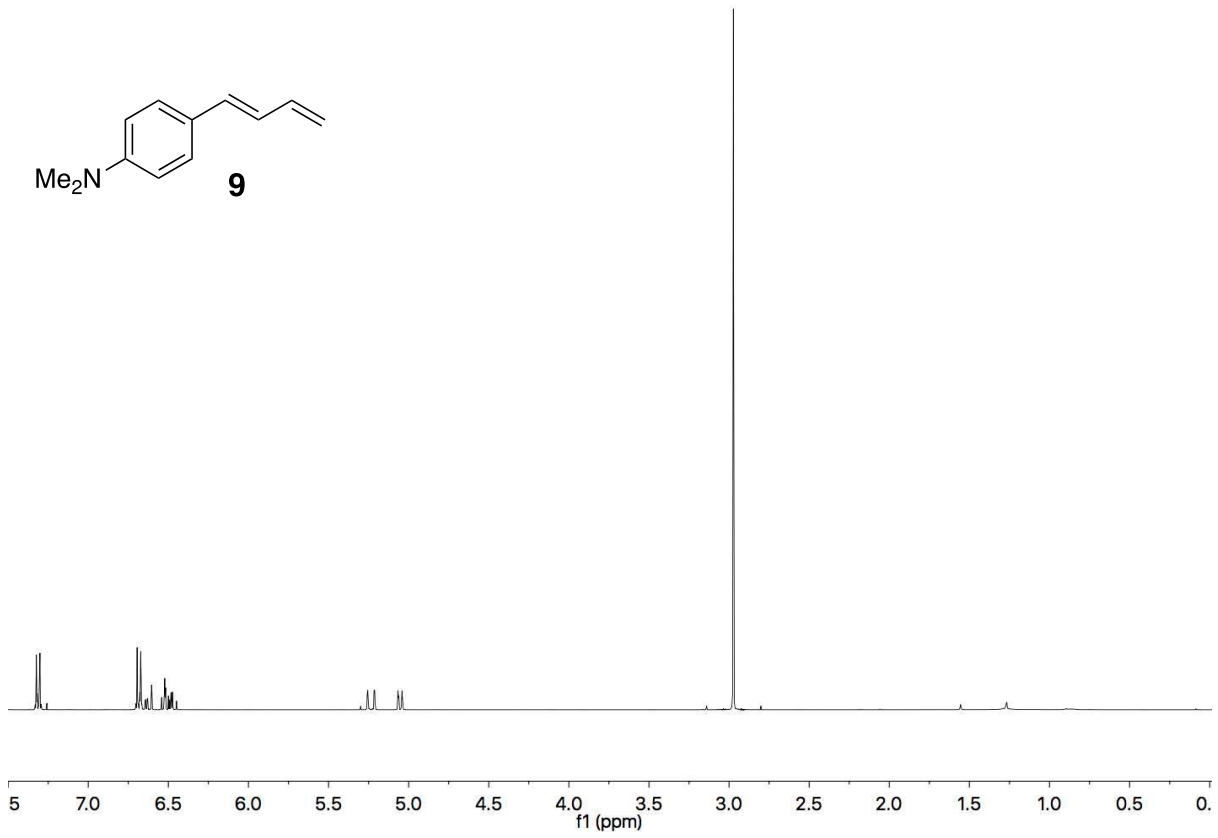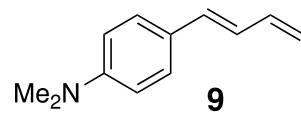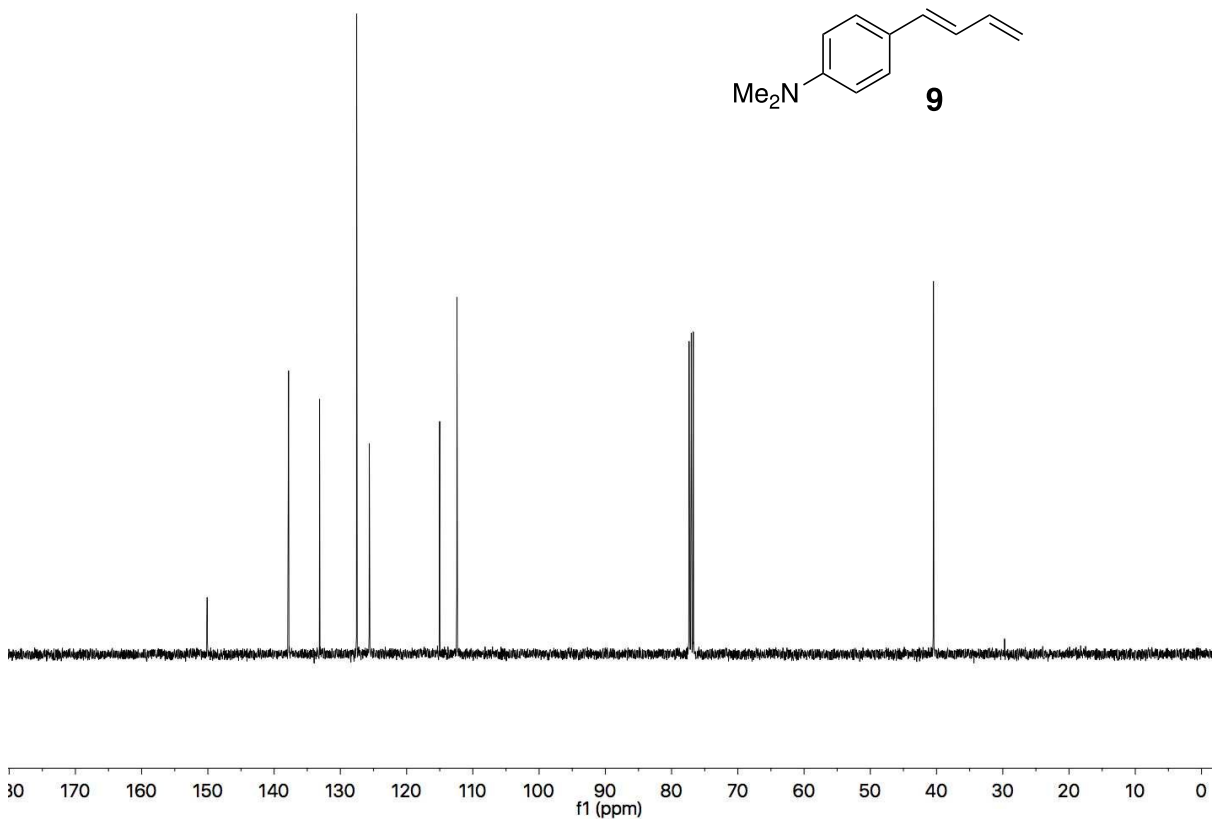

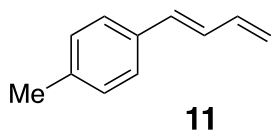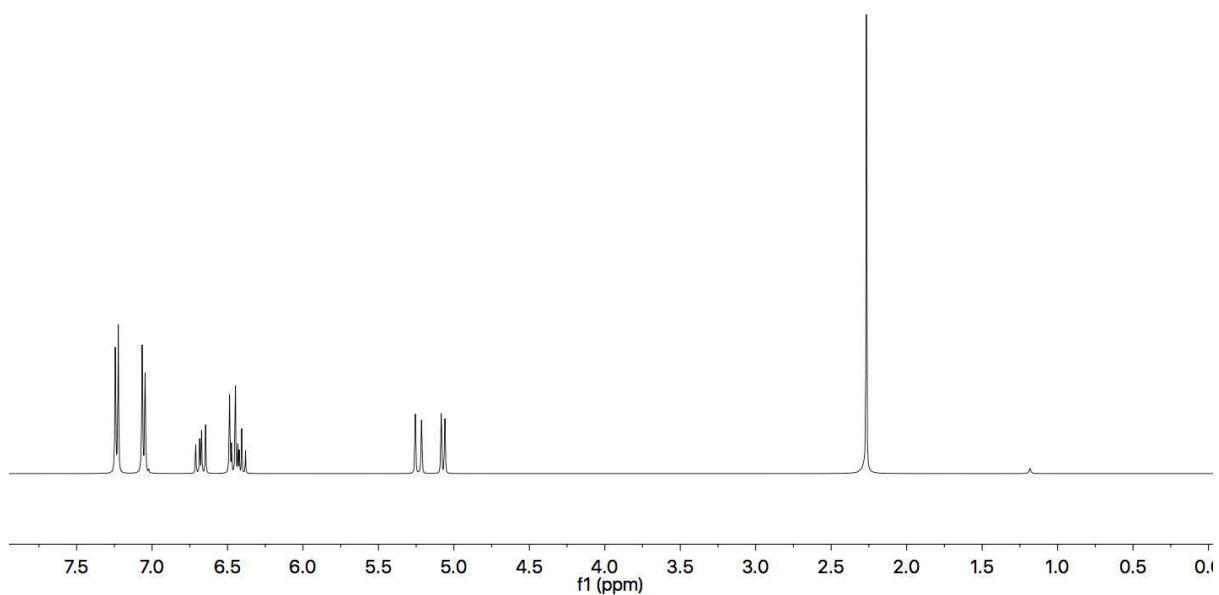

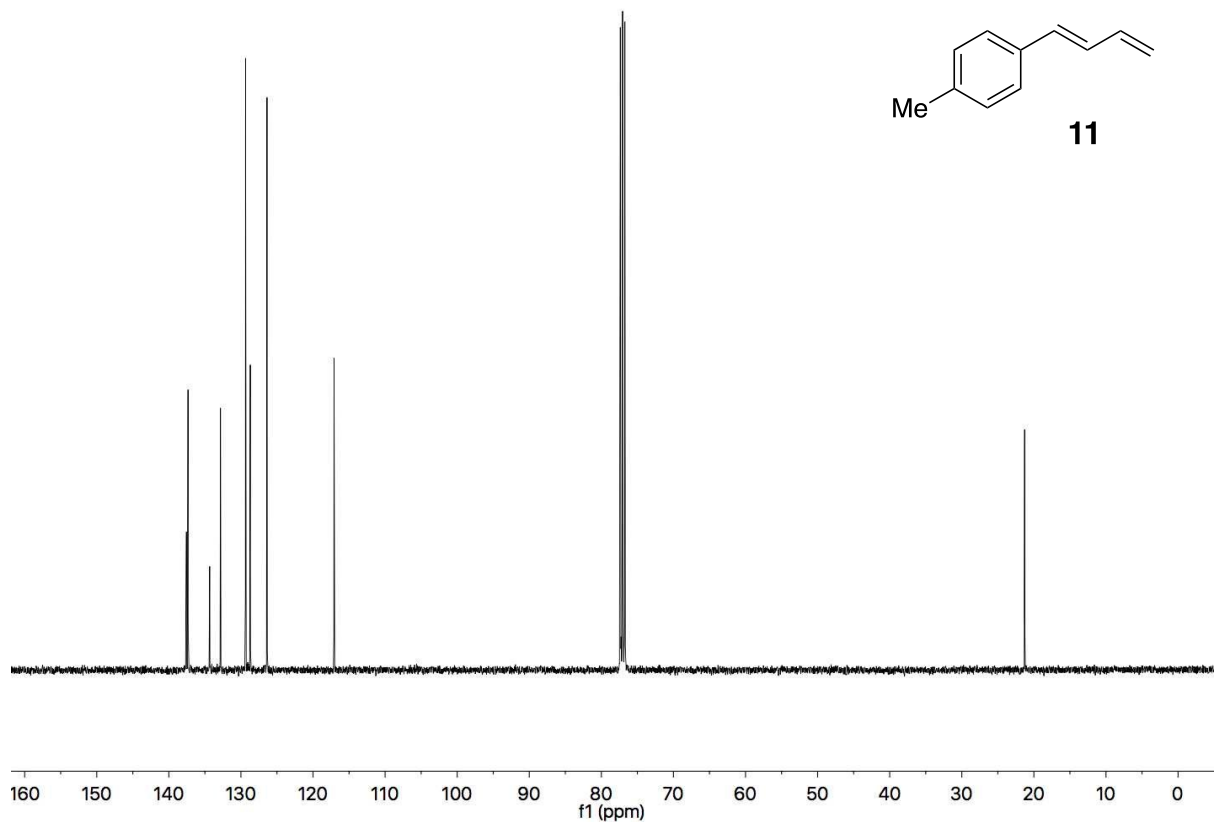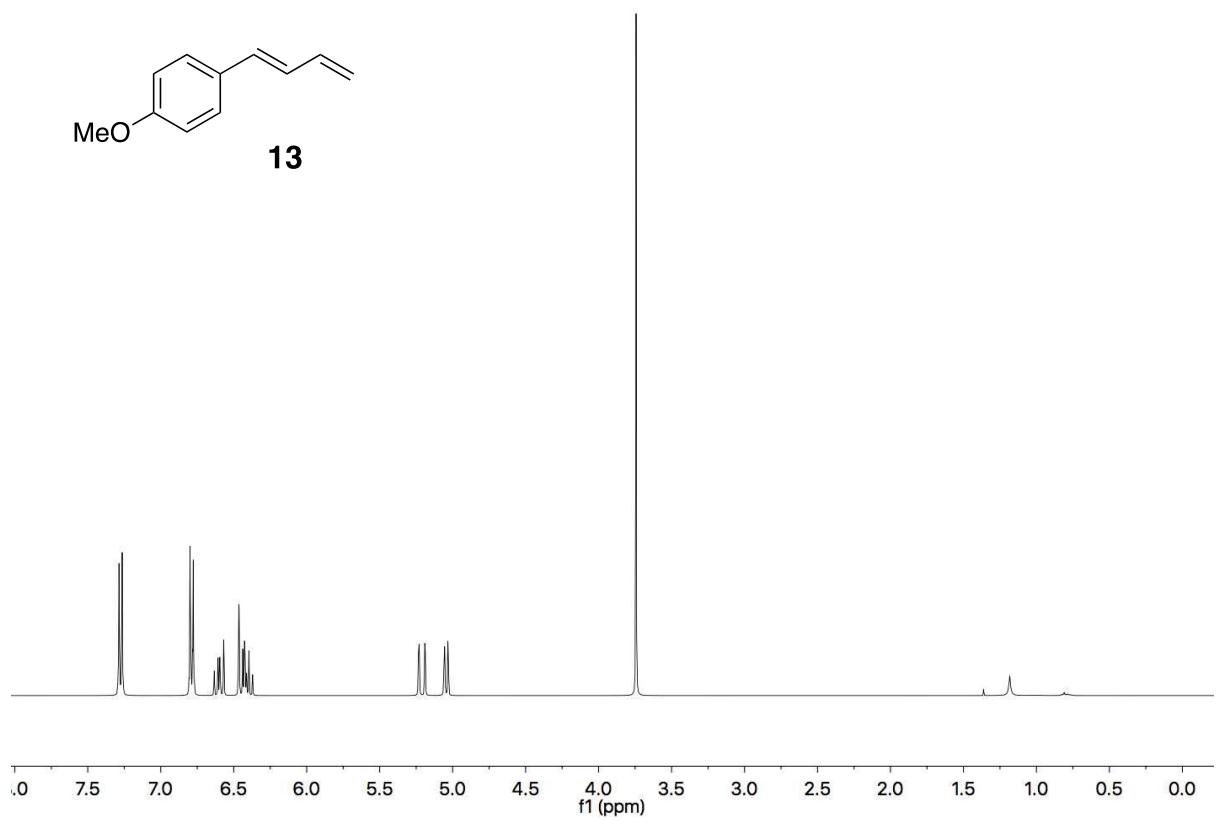



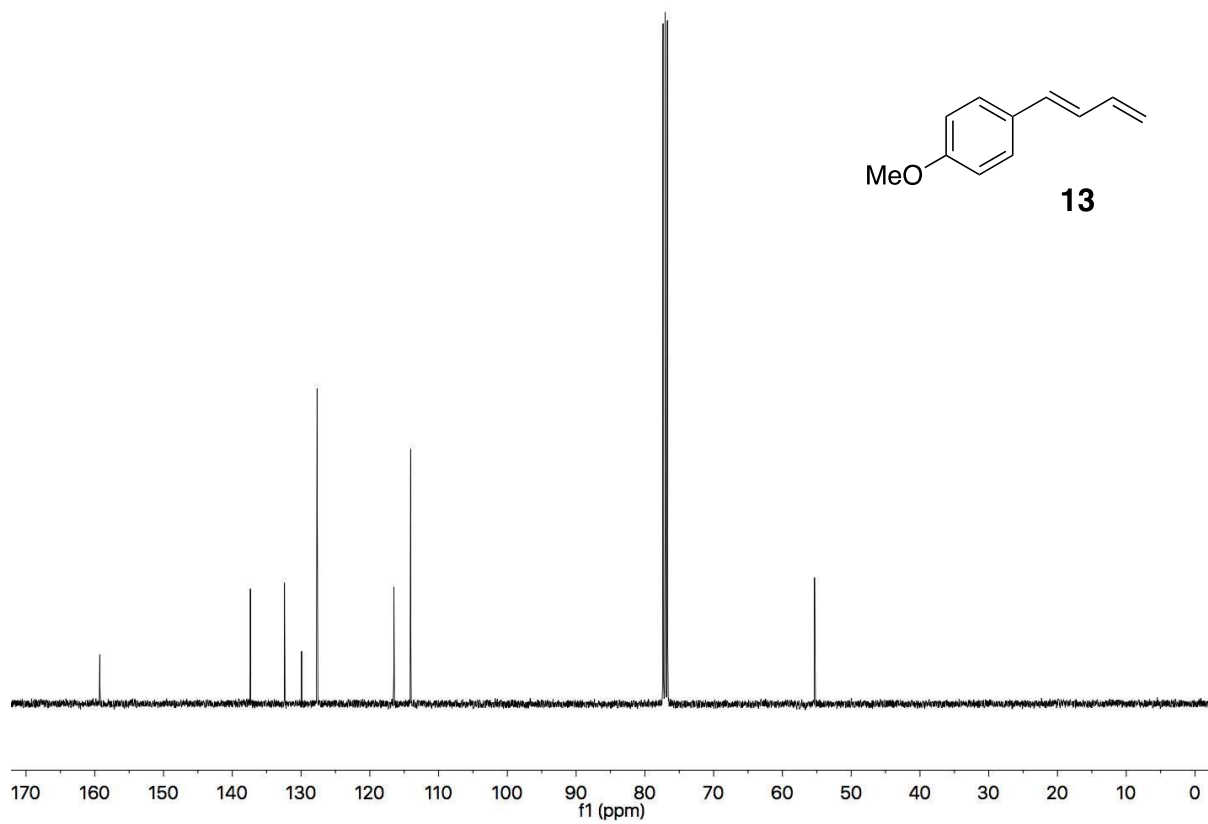

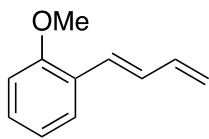

**15**

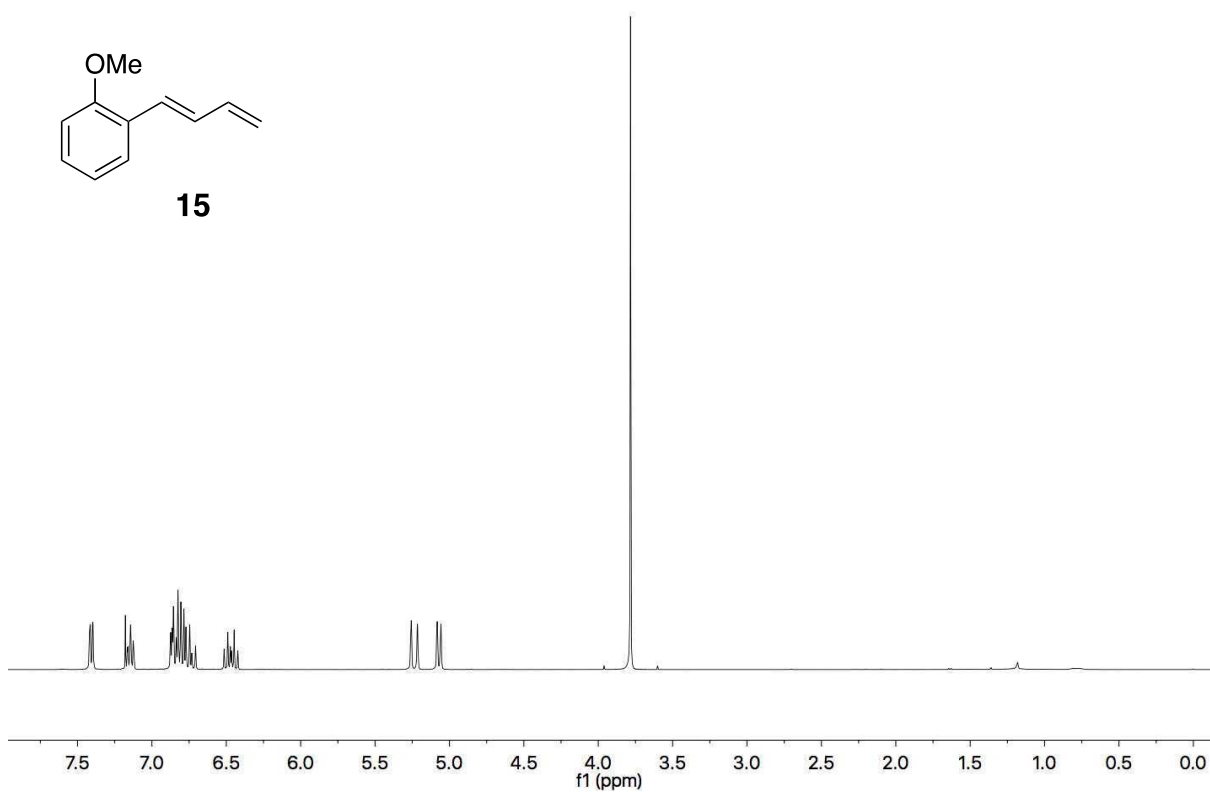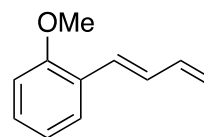

**15**

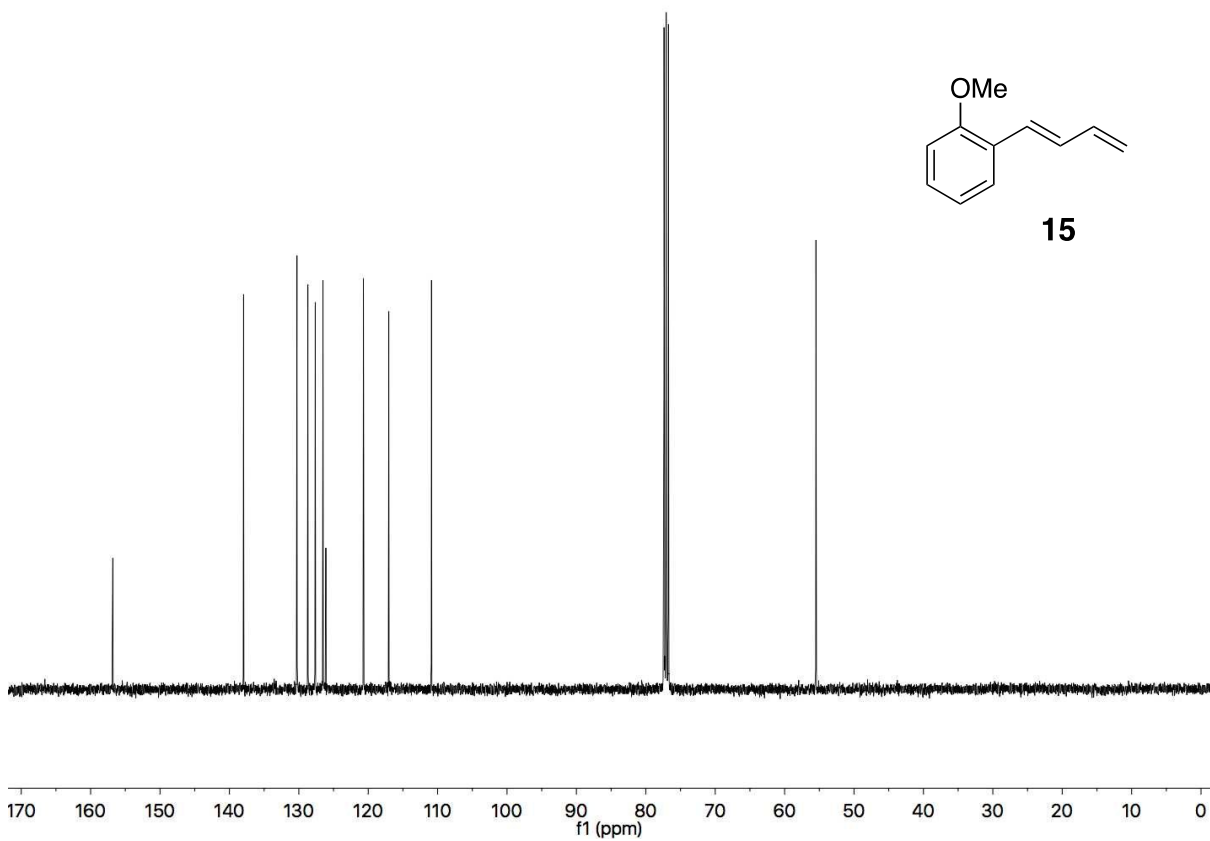

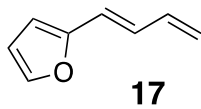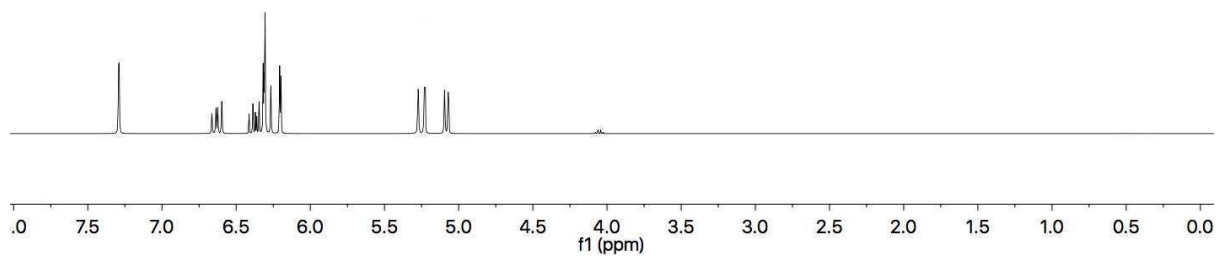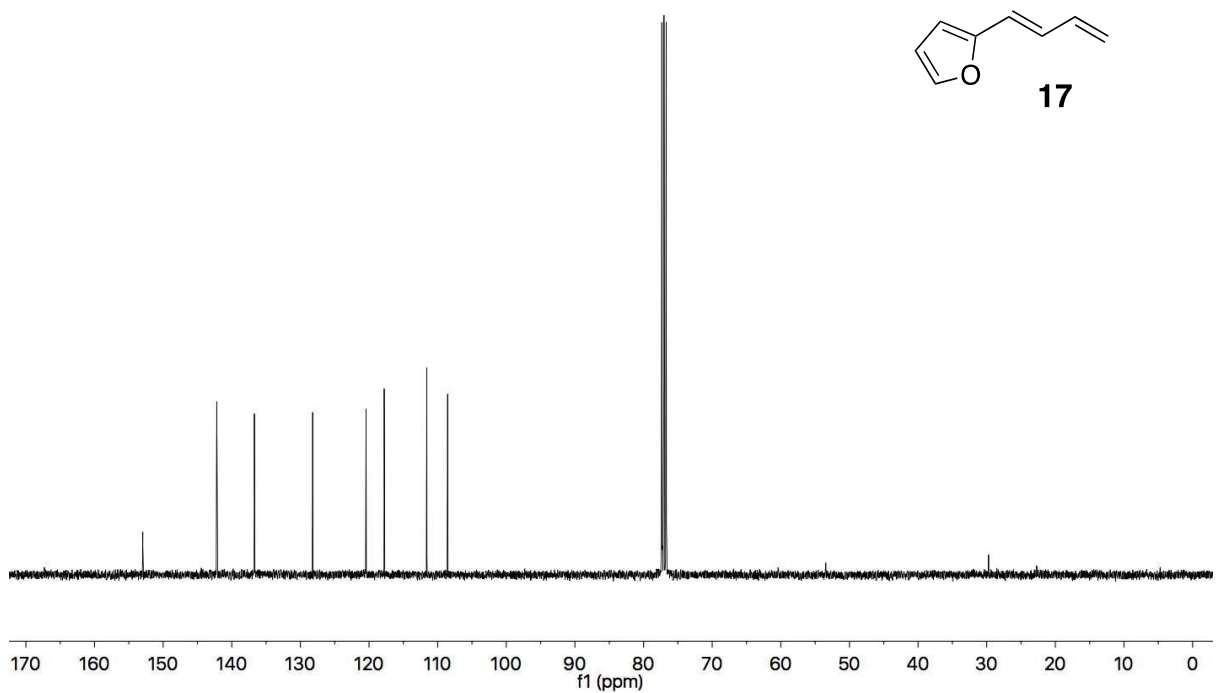

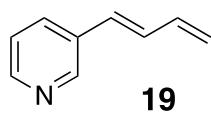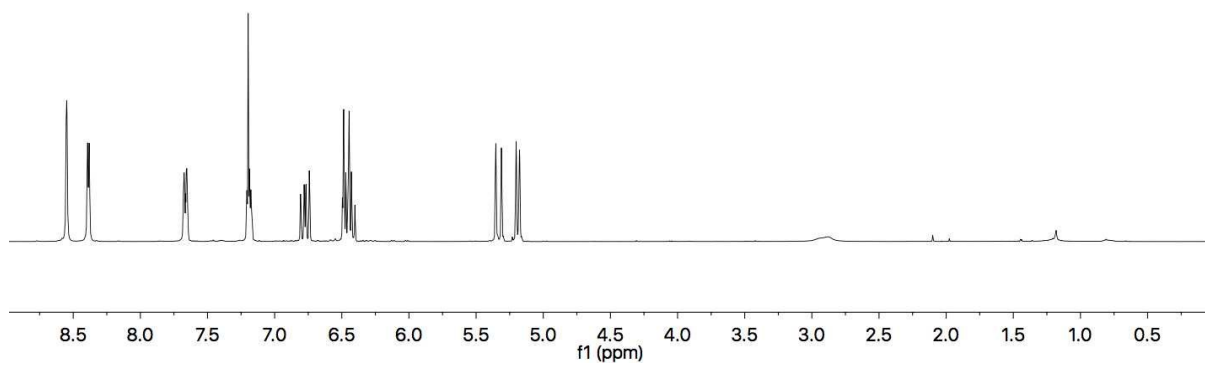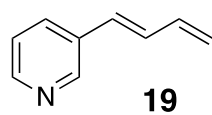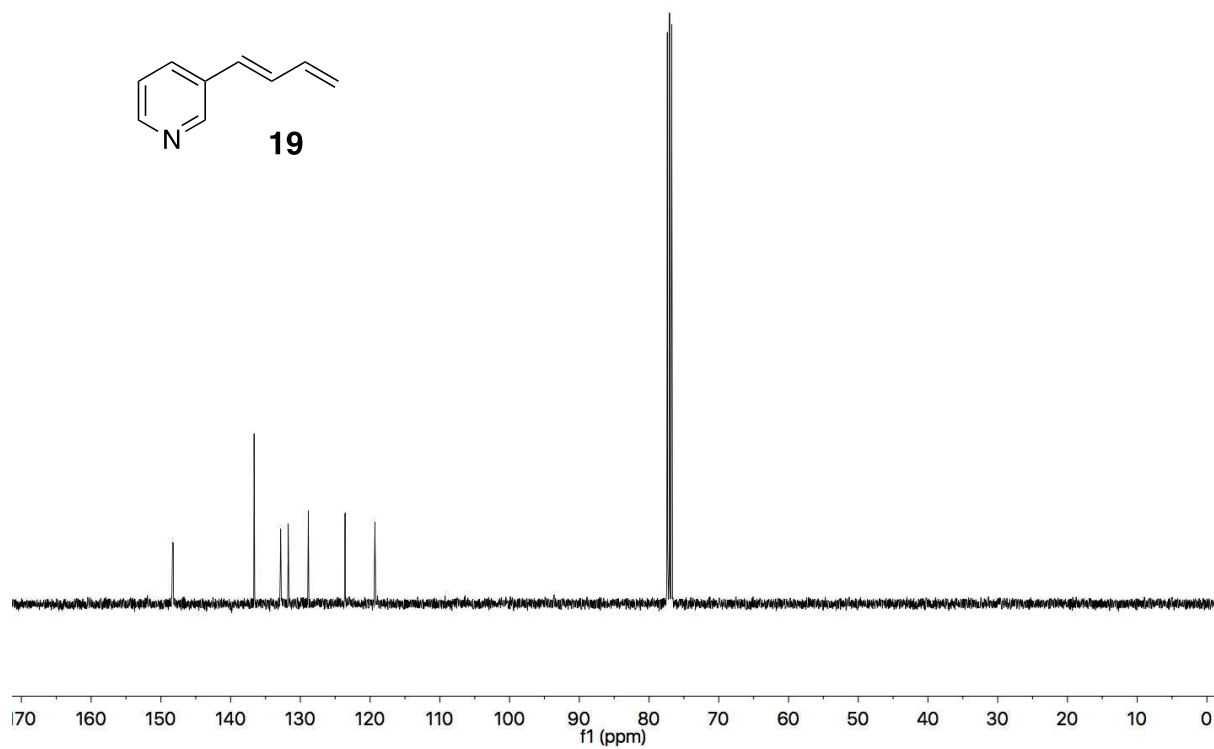

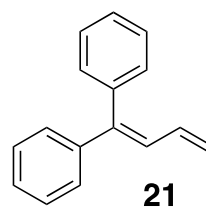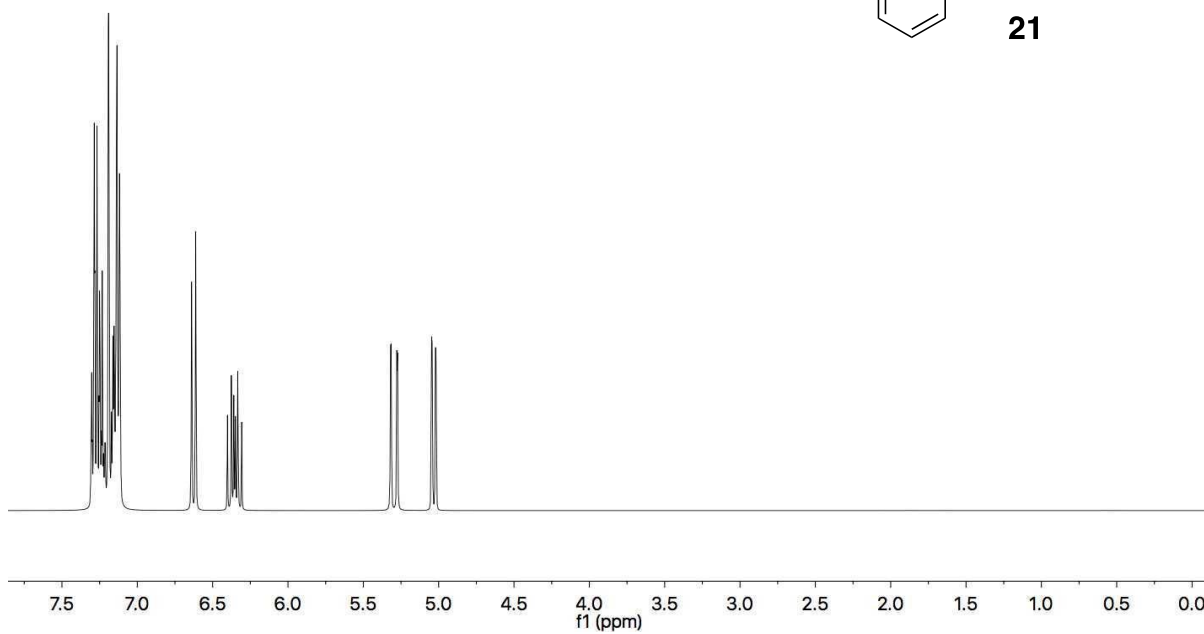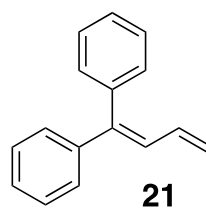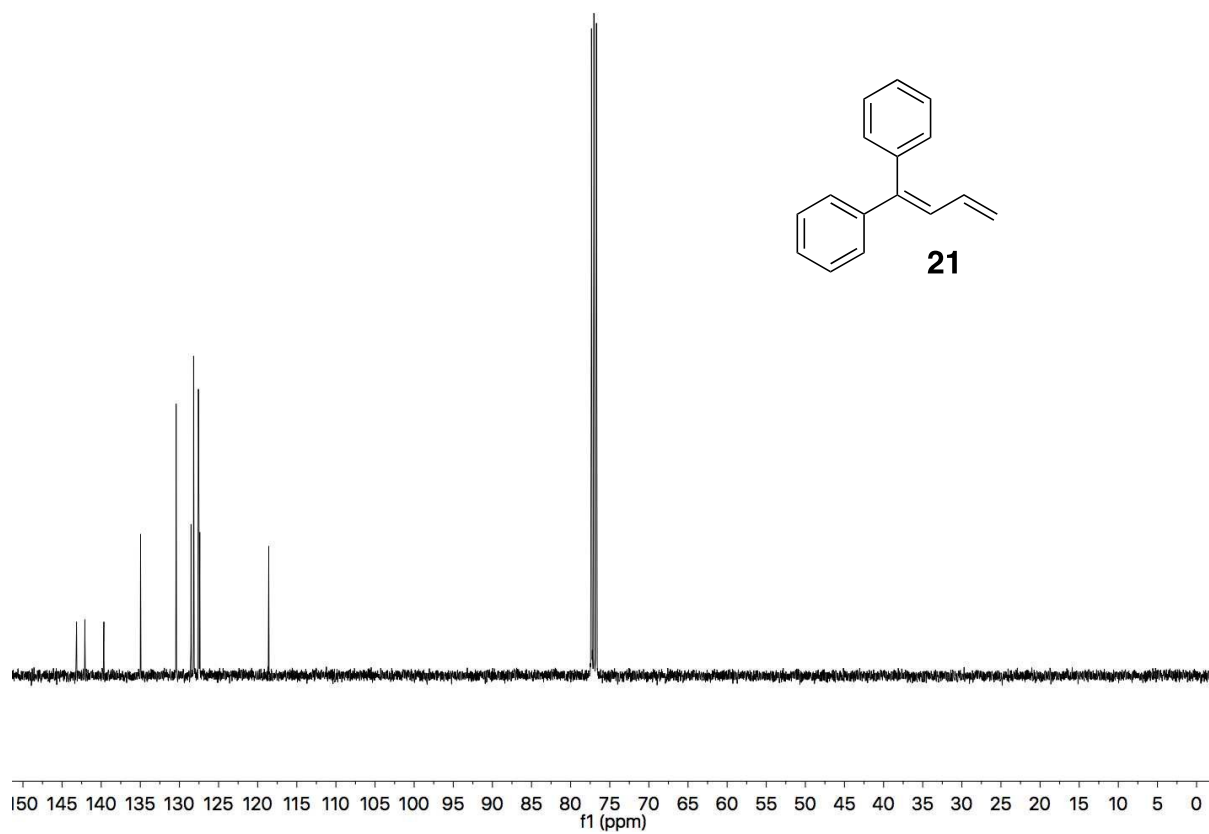

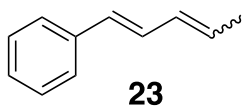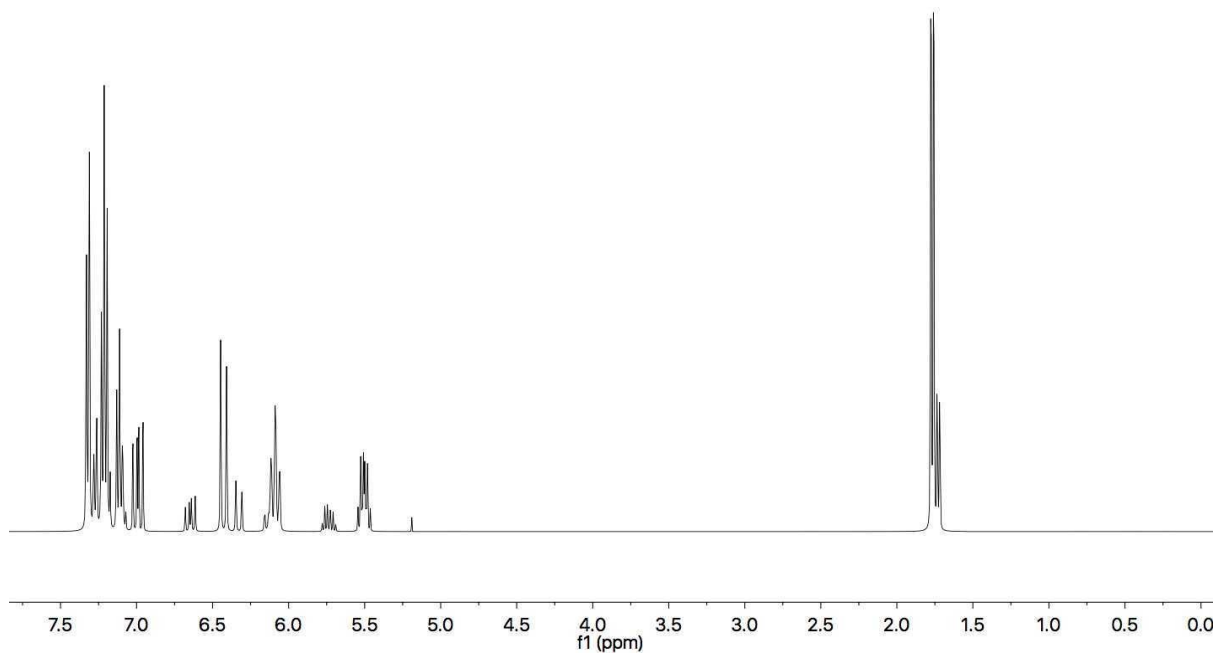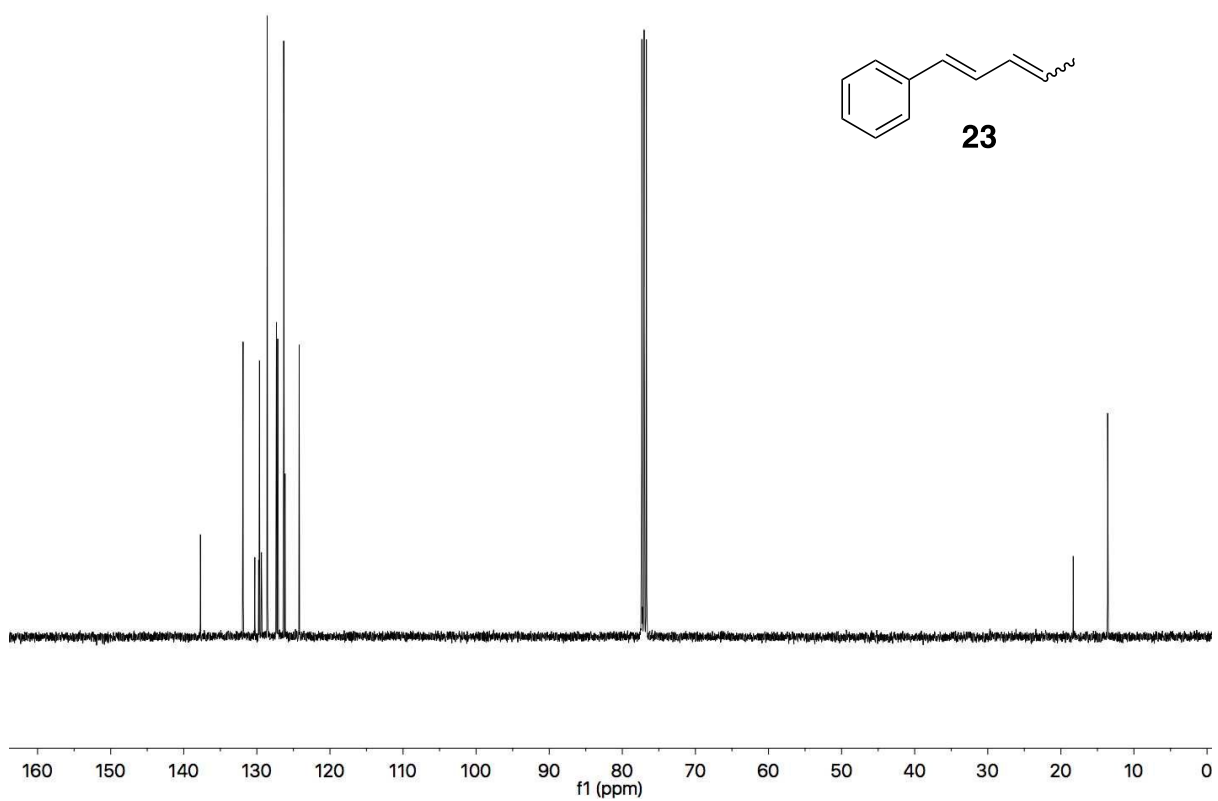

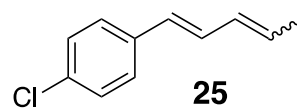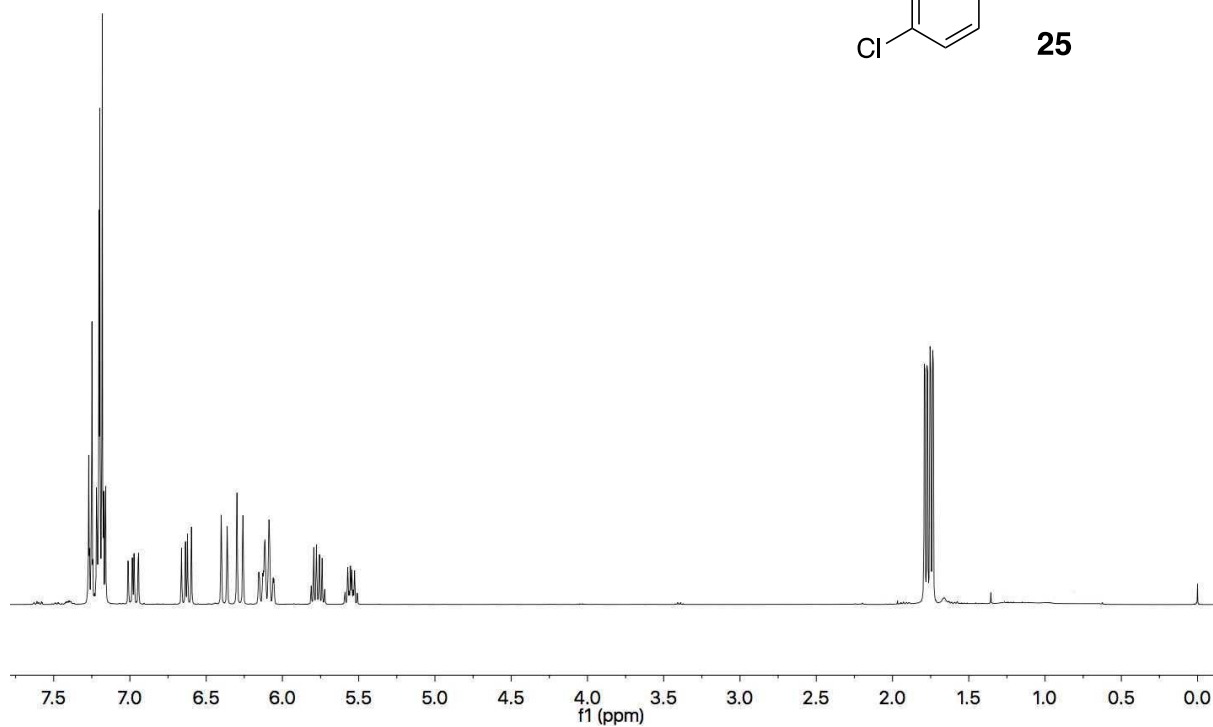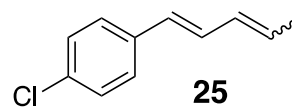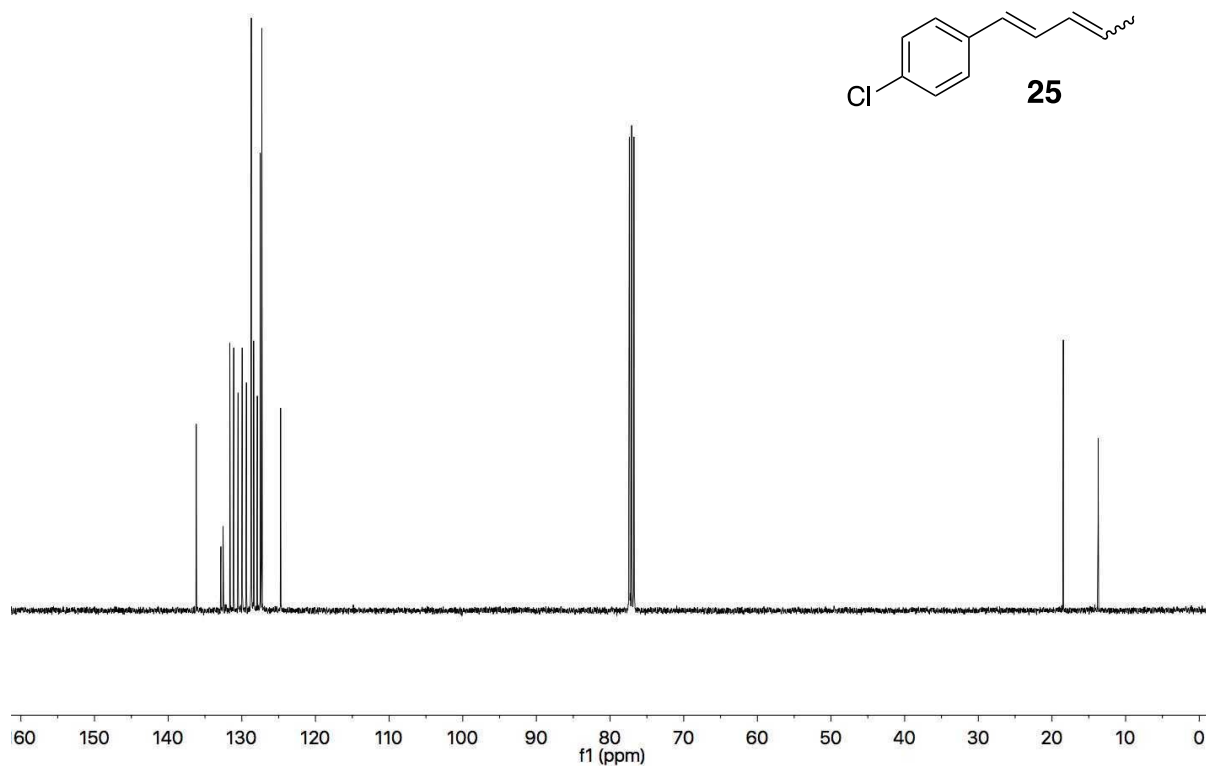

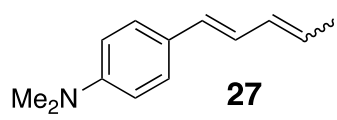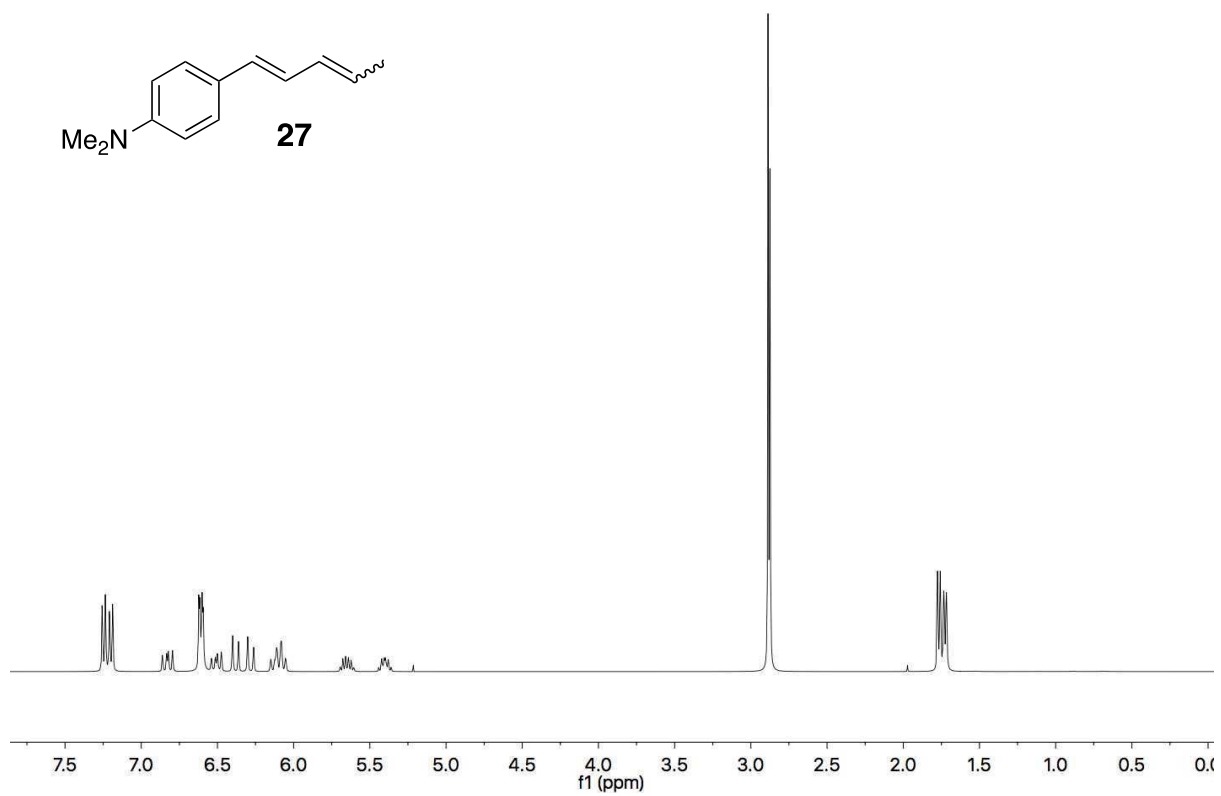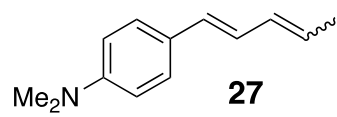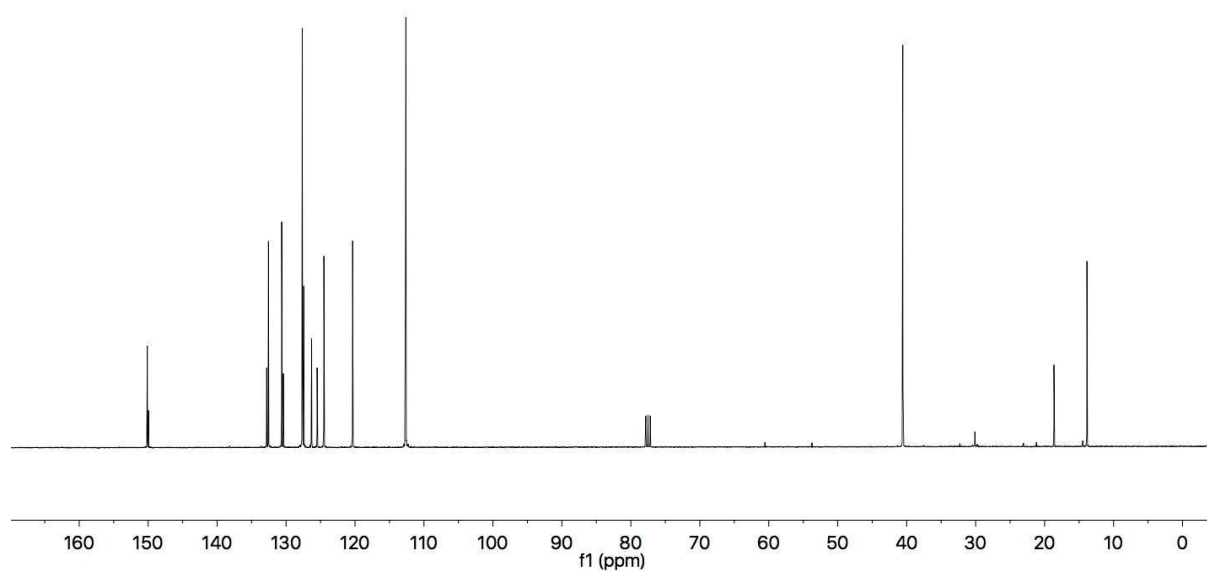



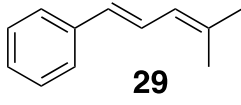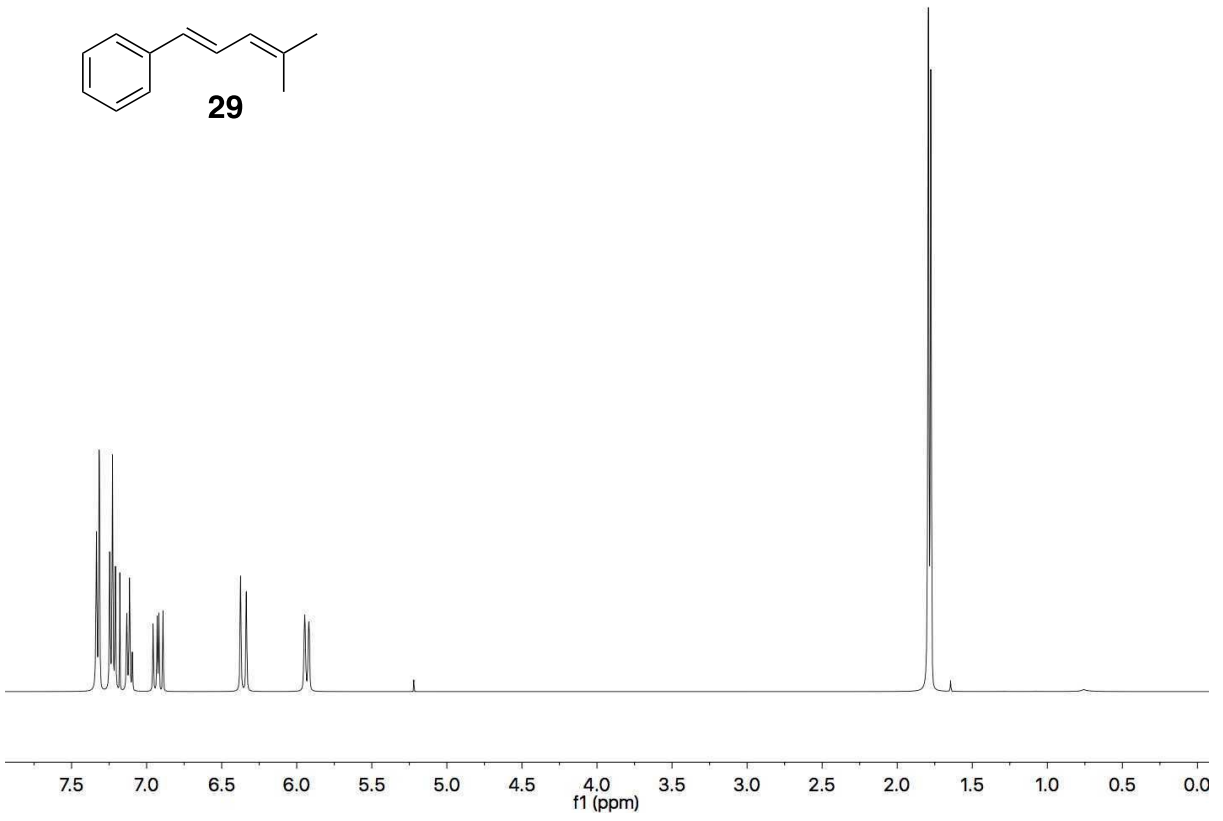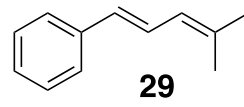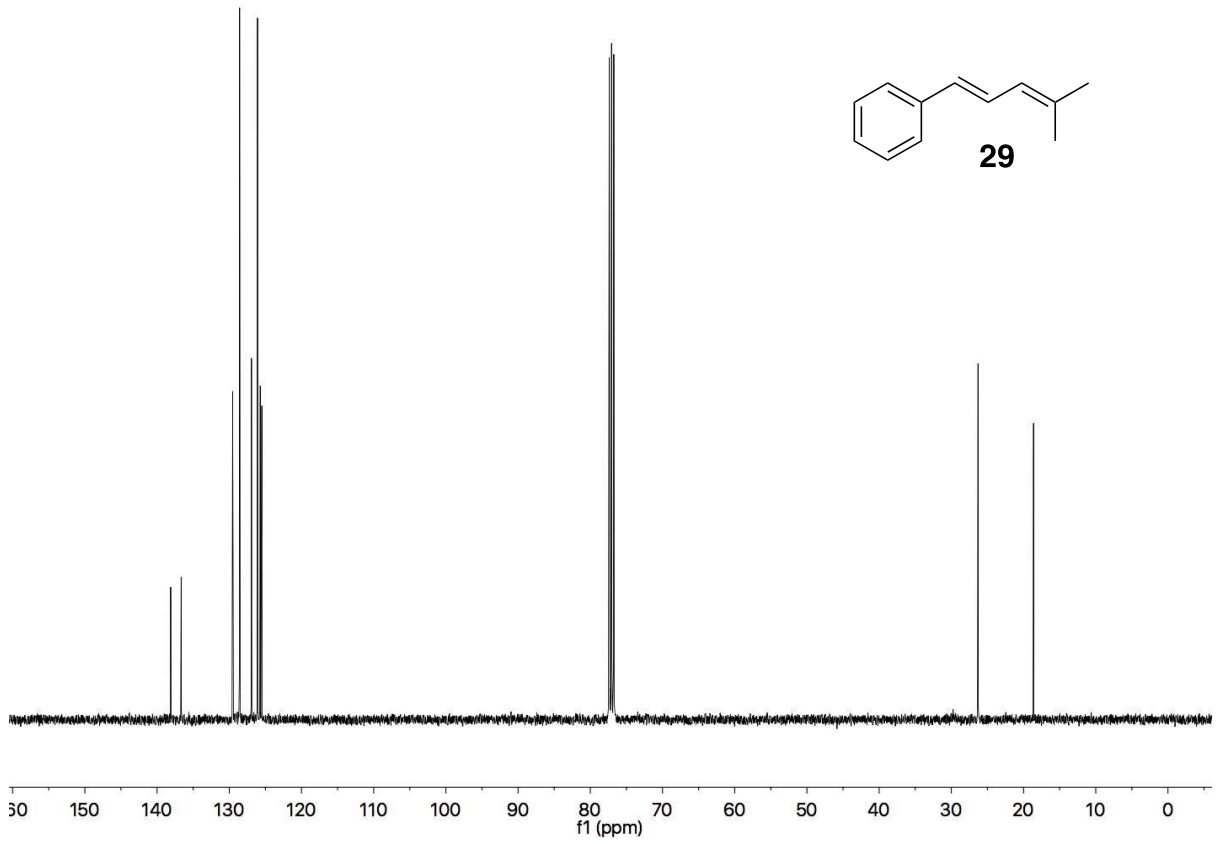

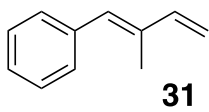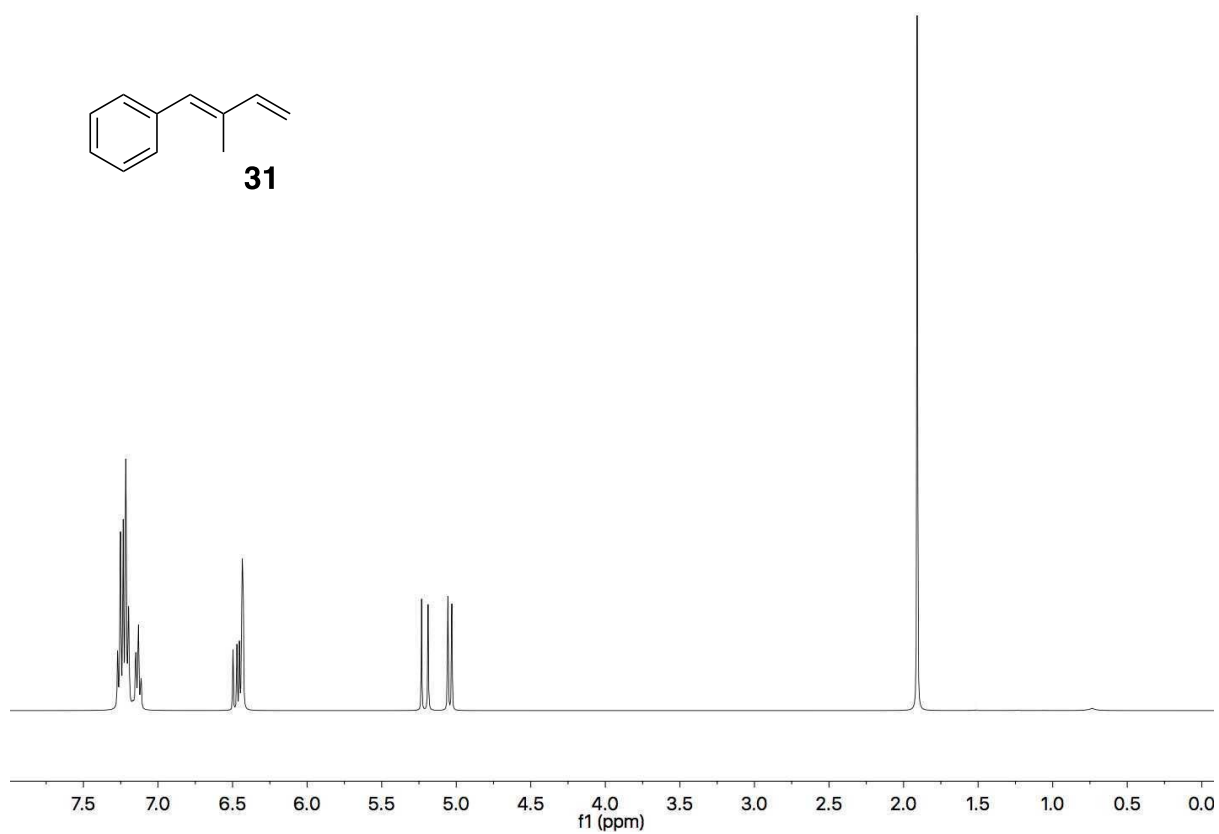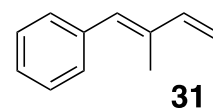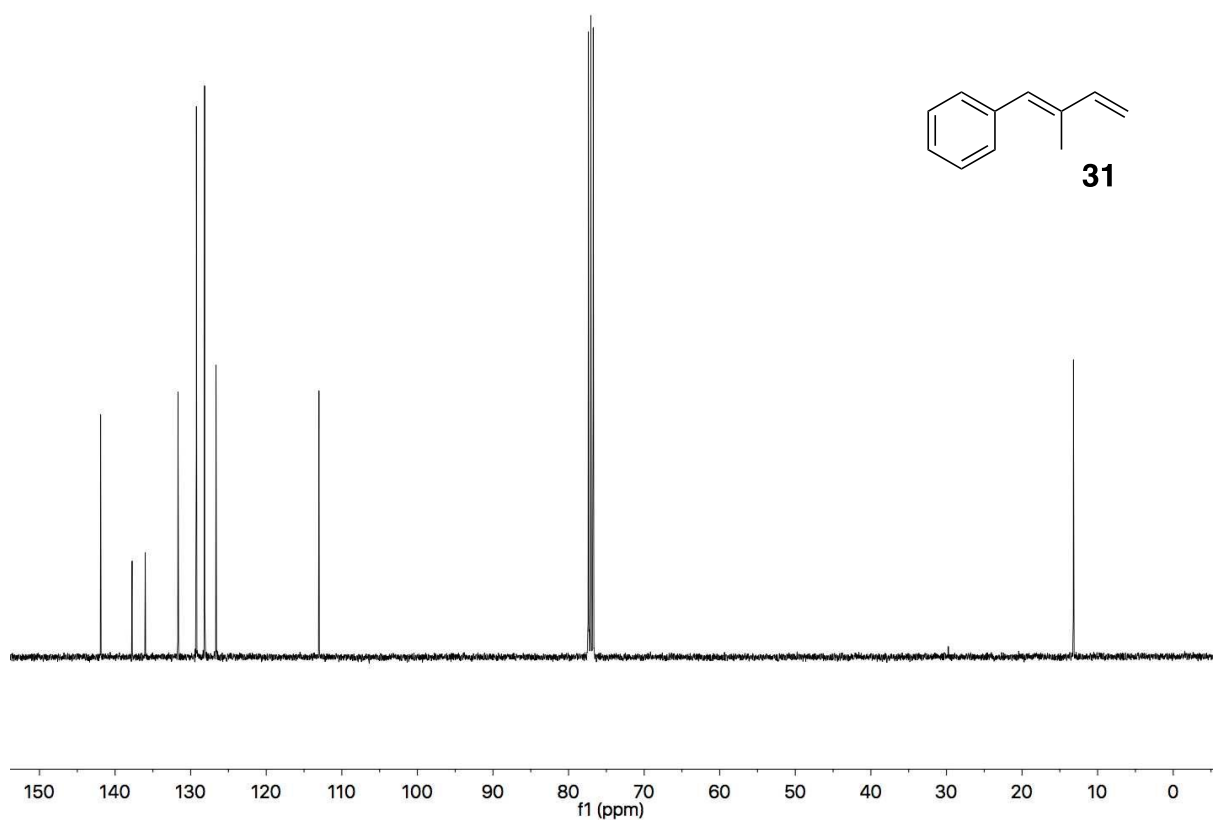

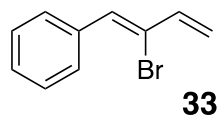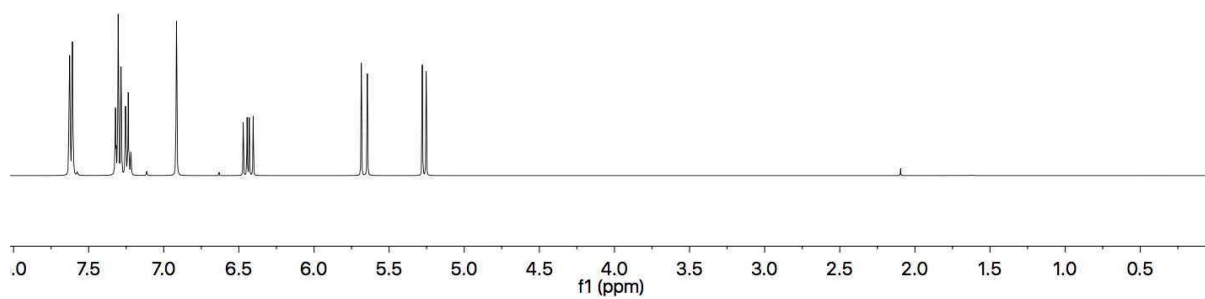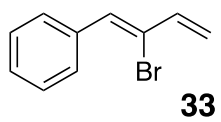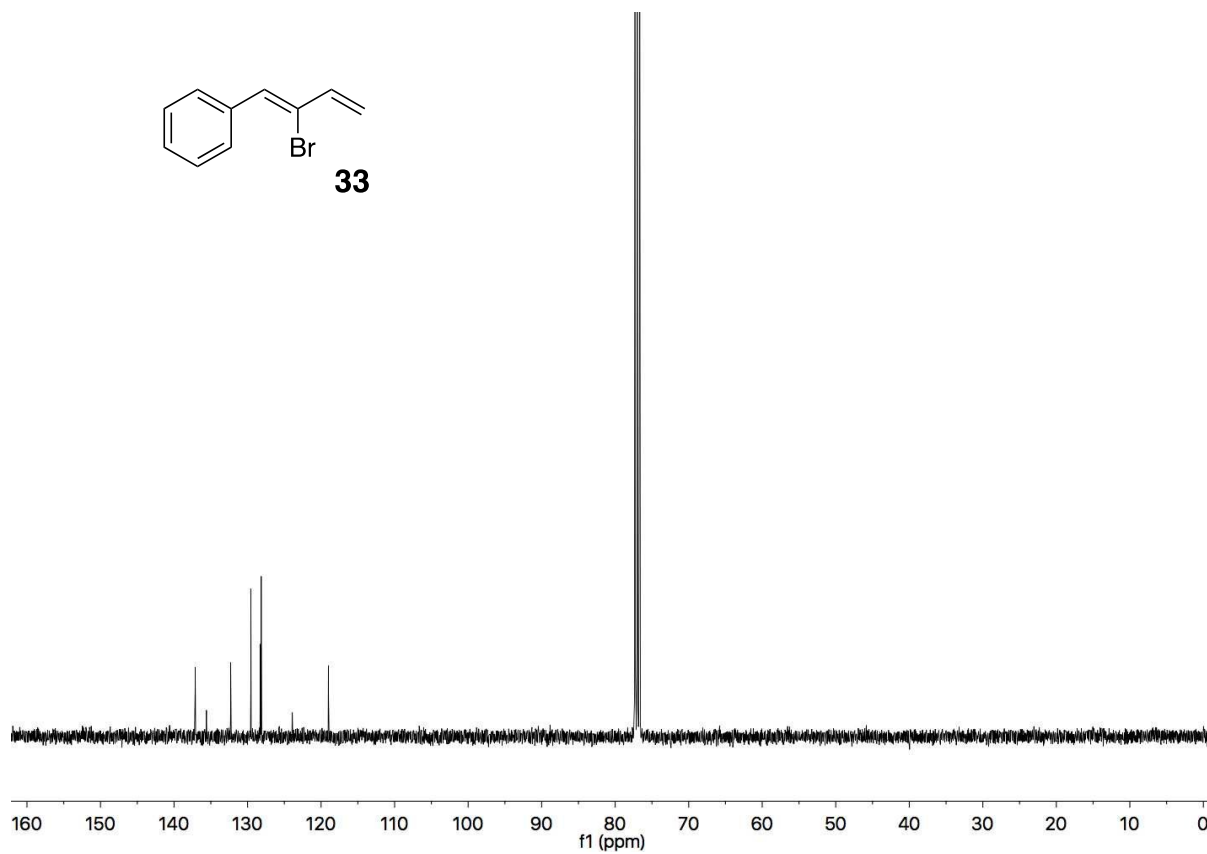

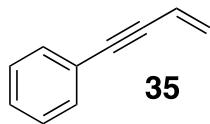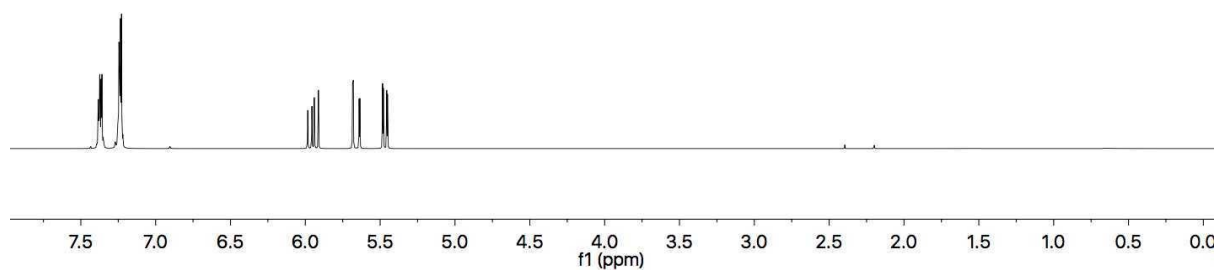

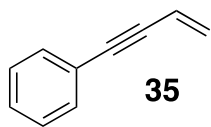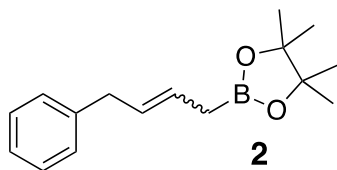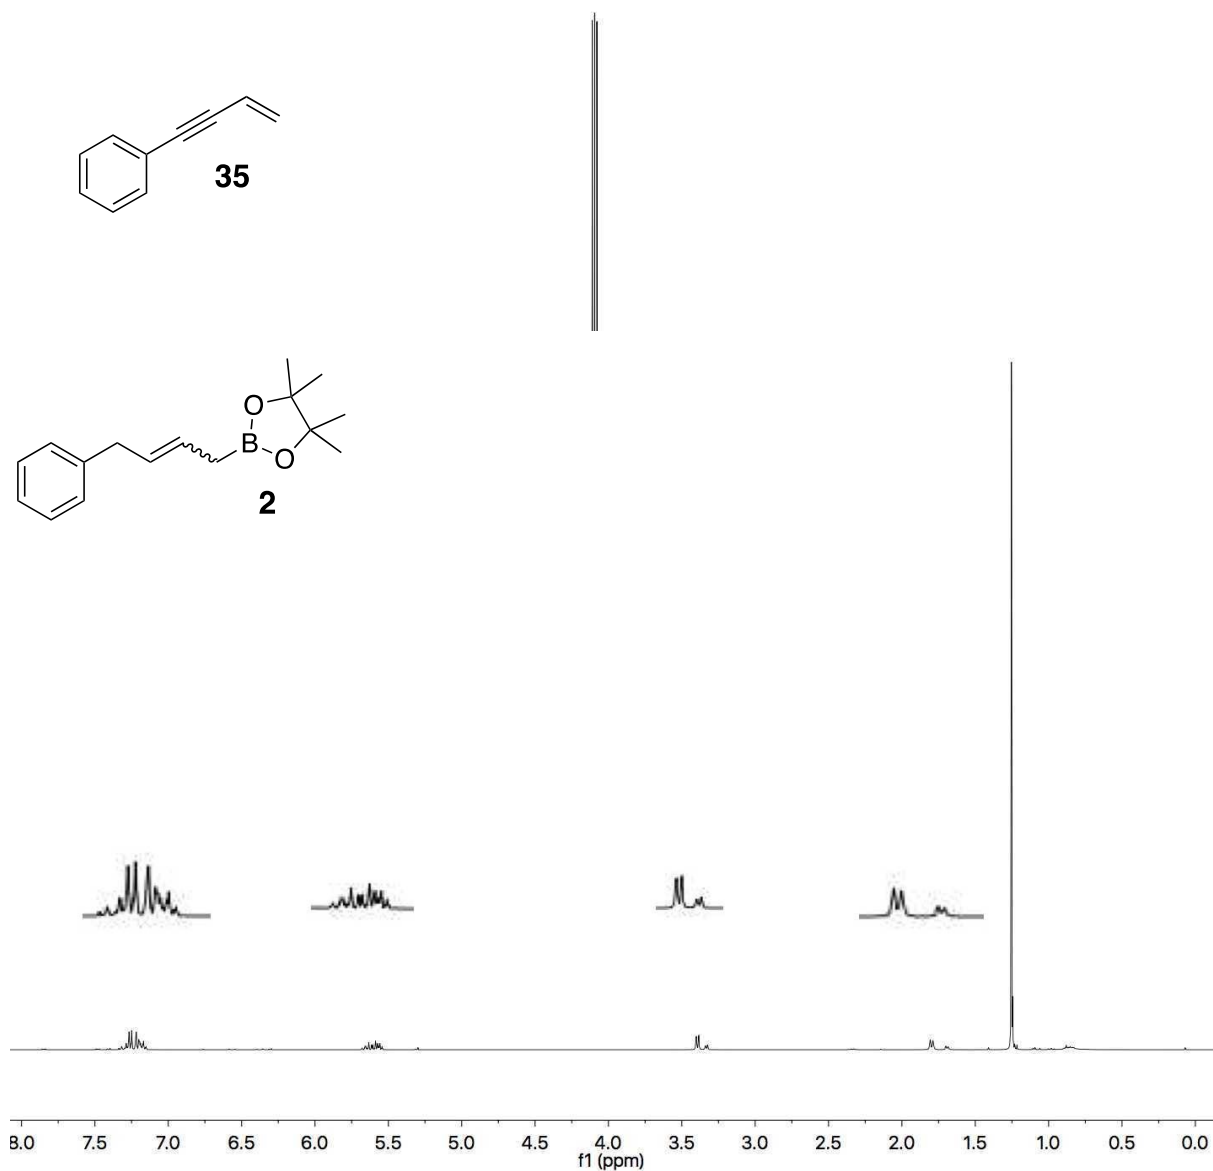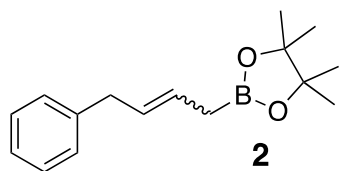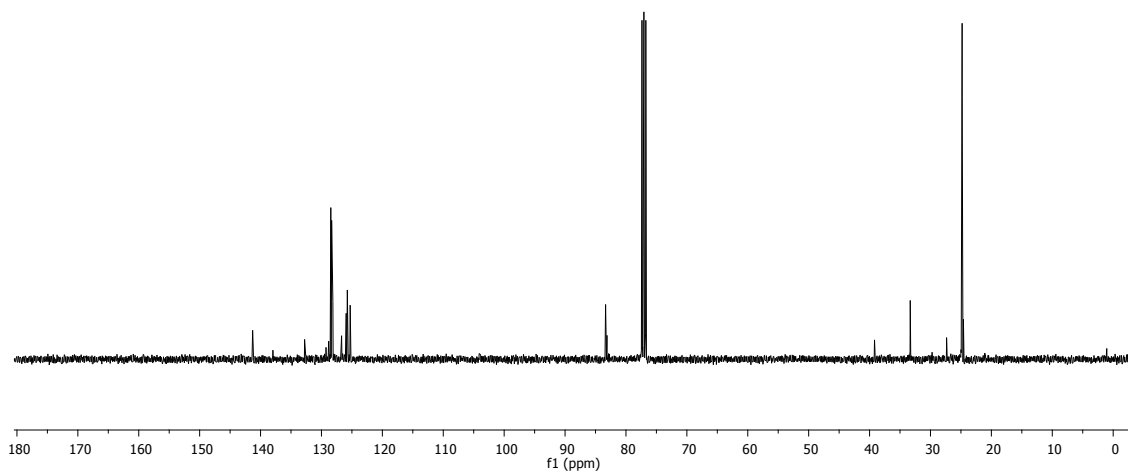

45



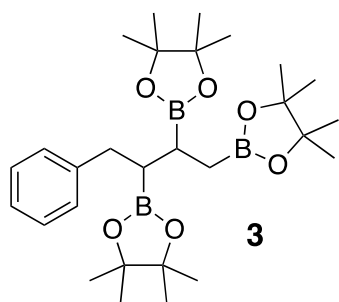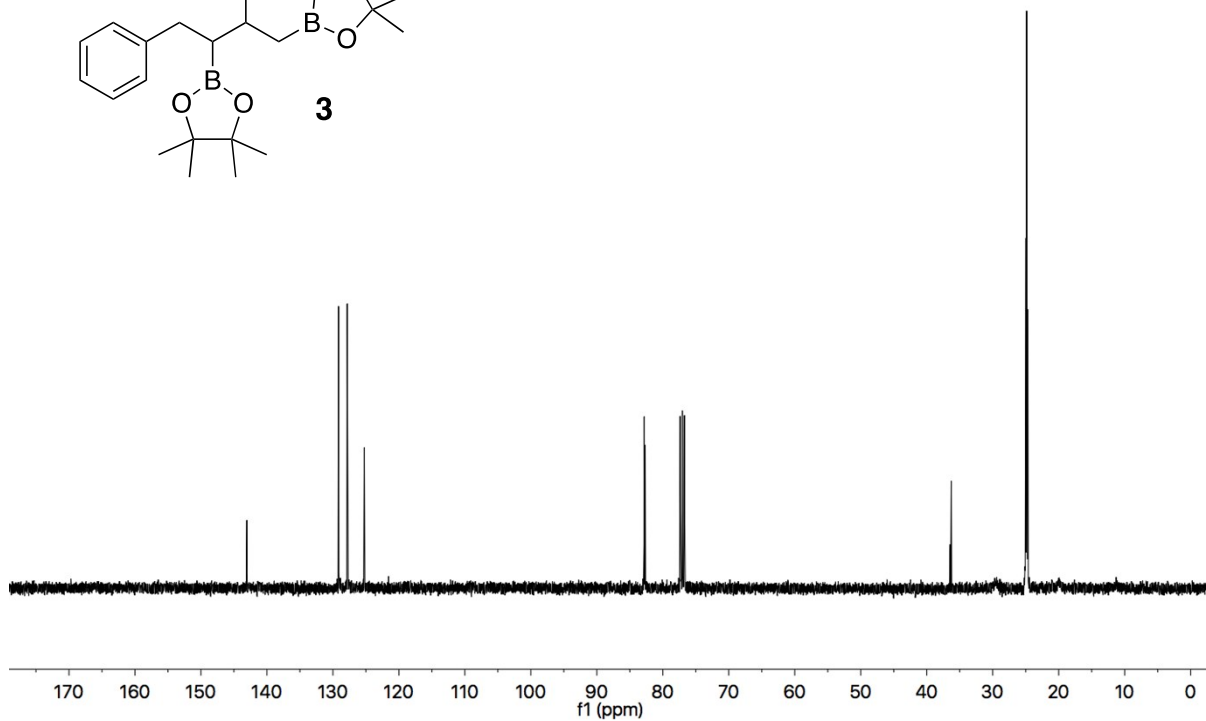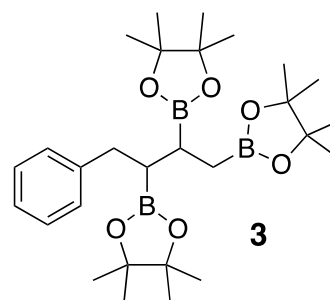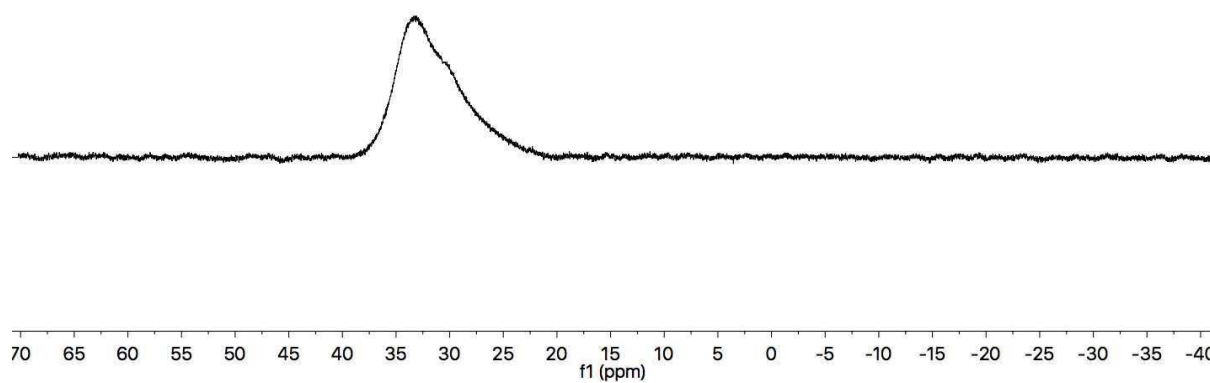

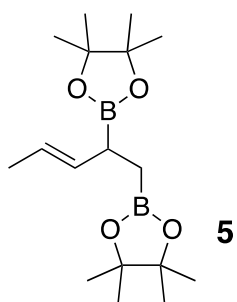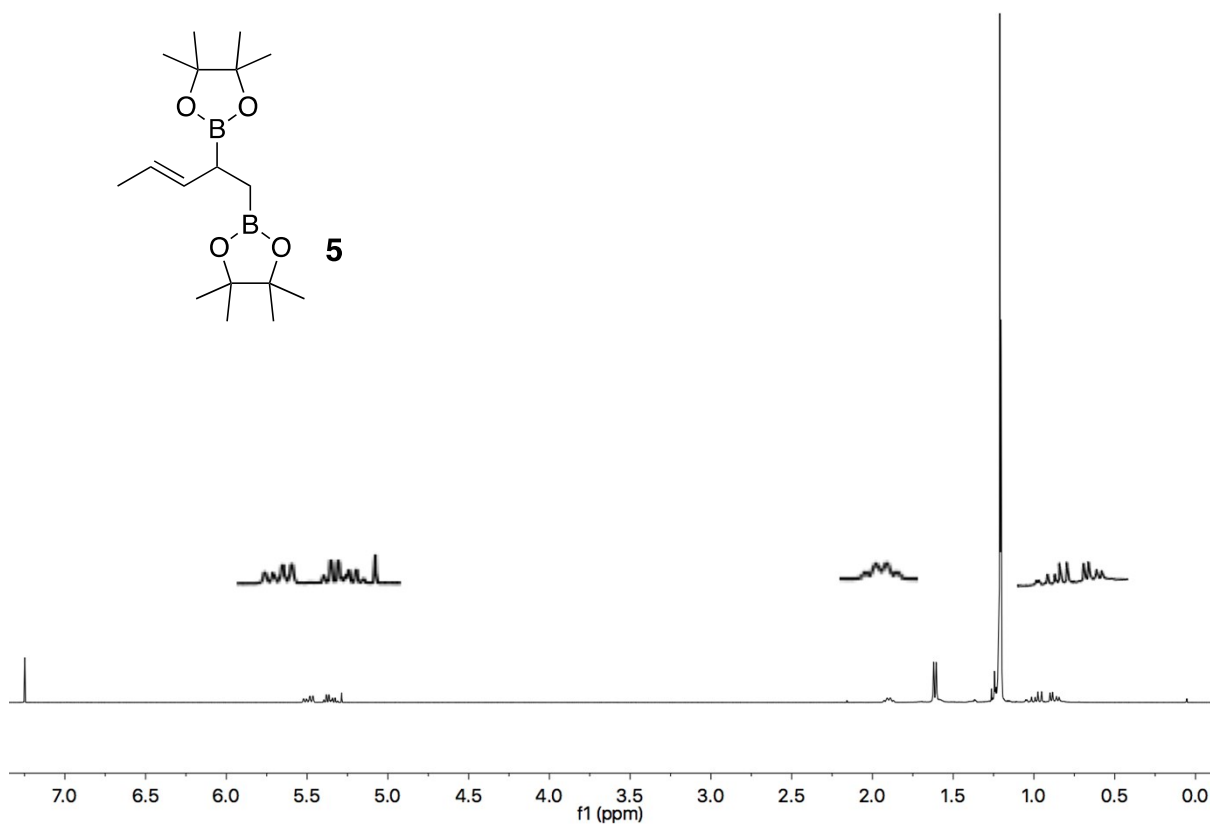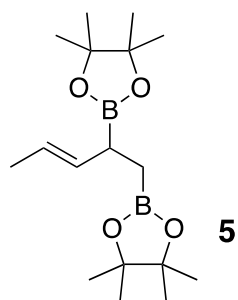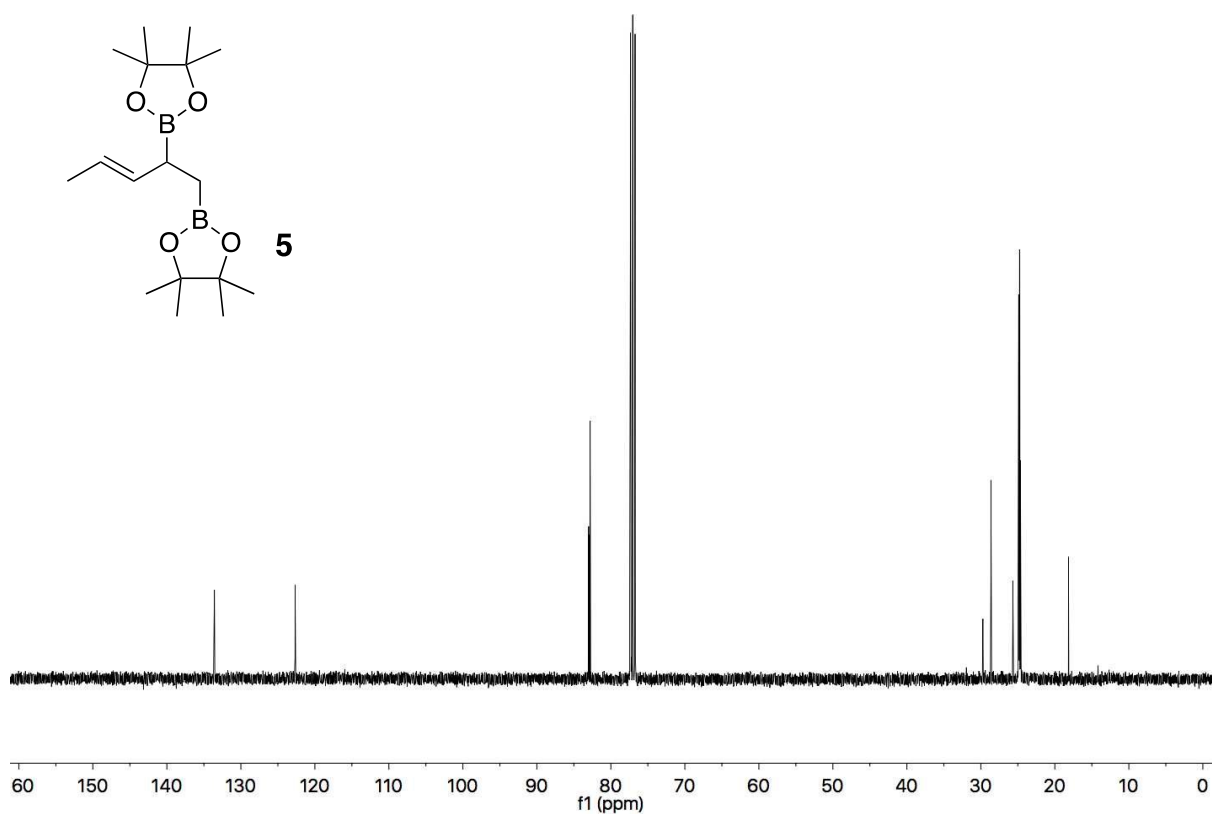



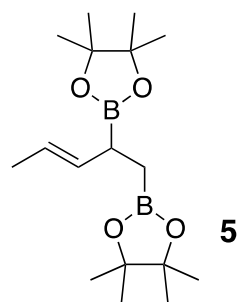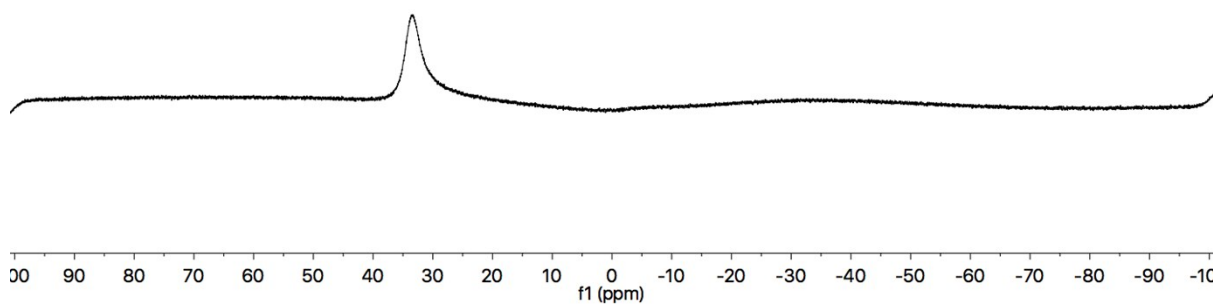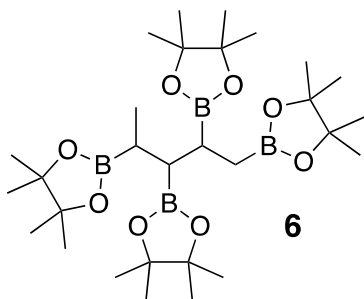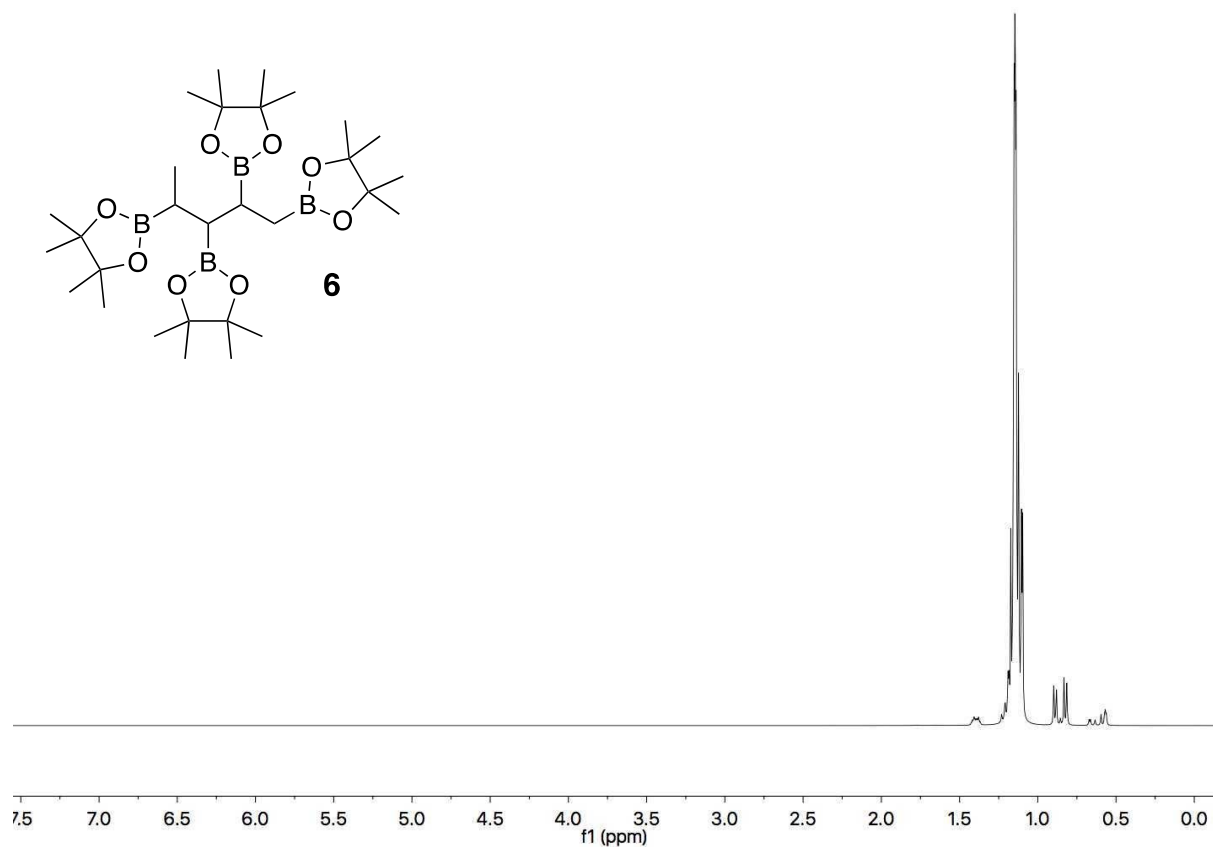

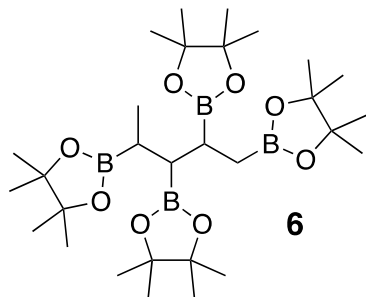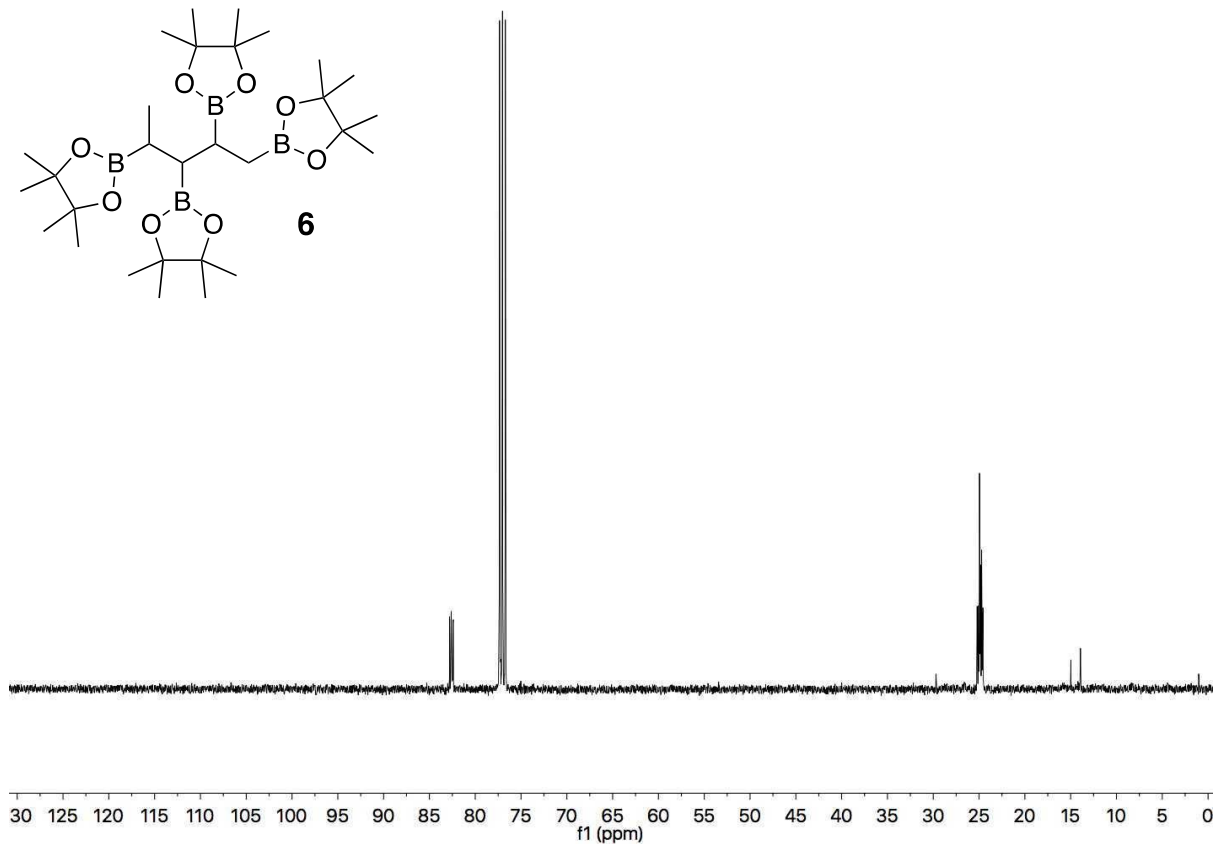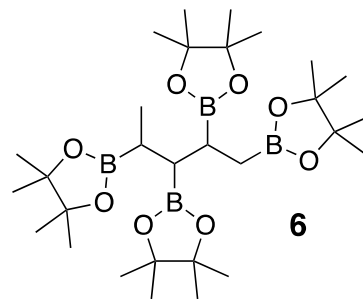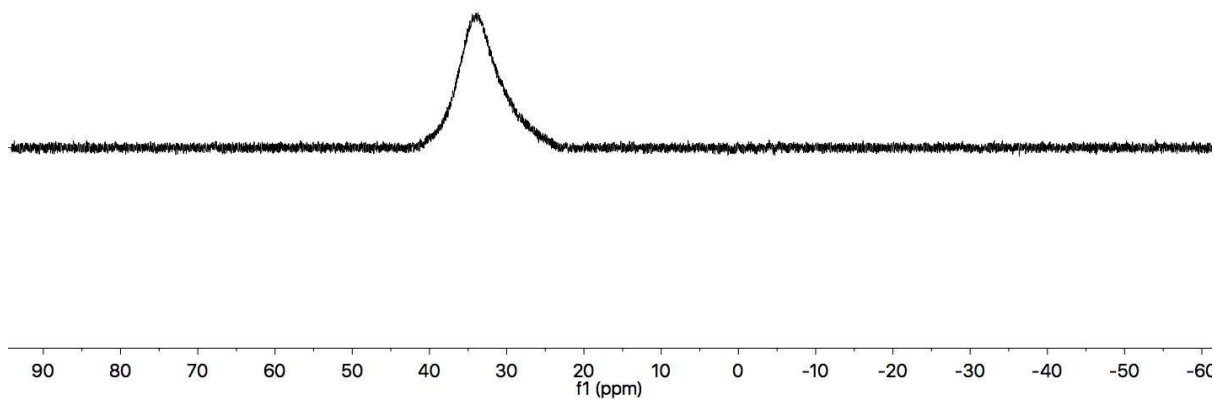

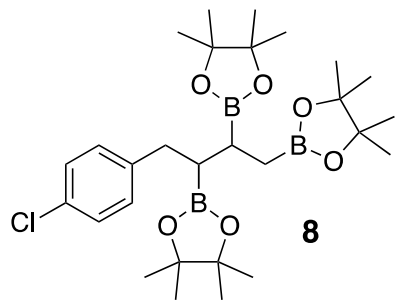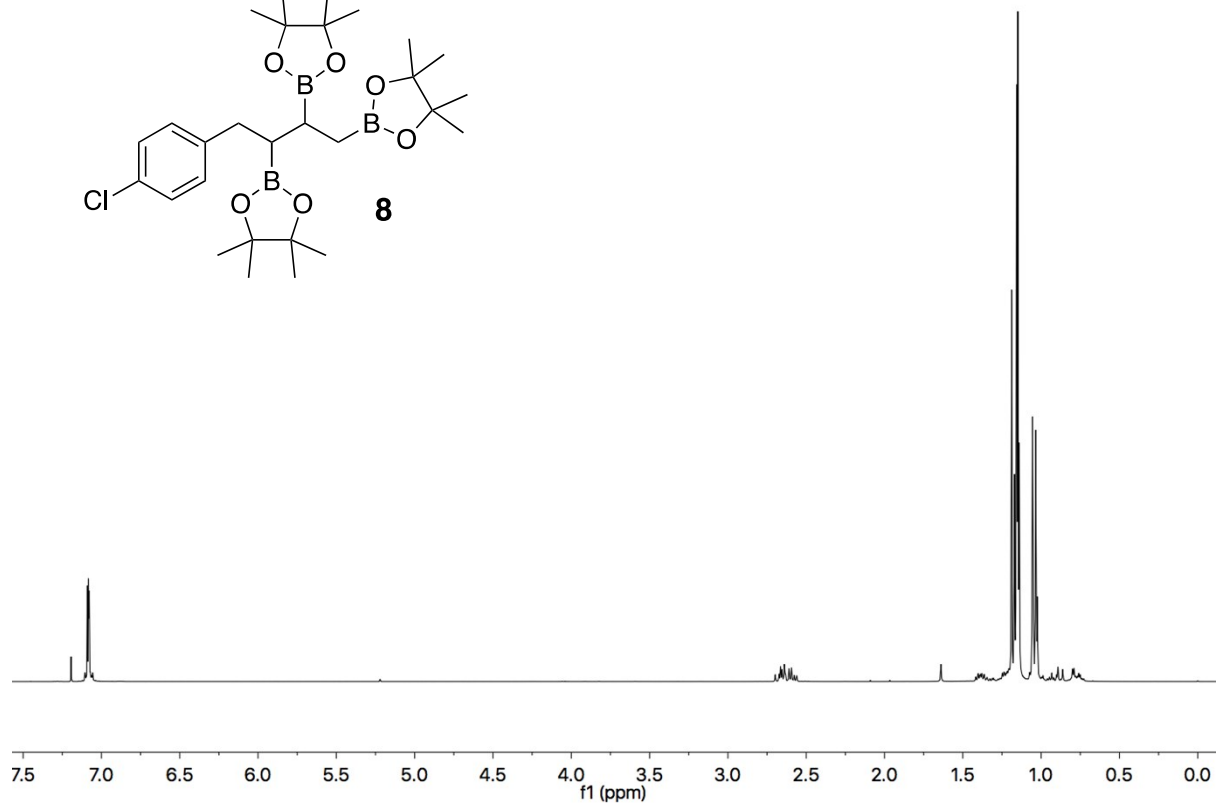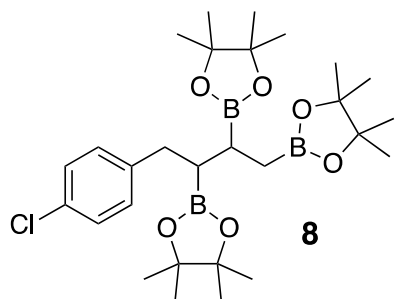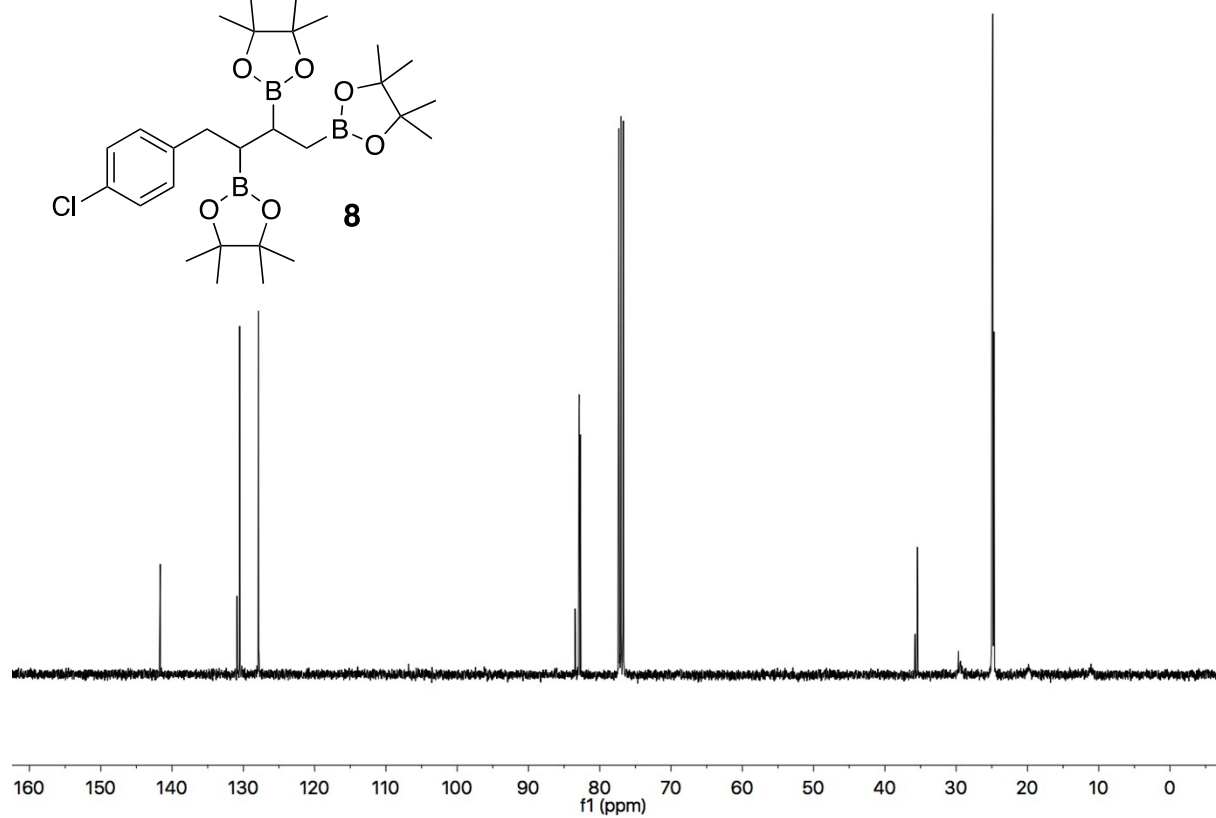

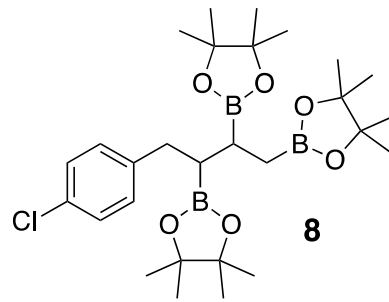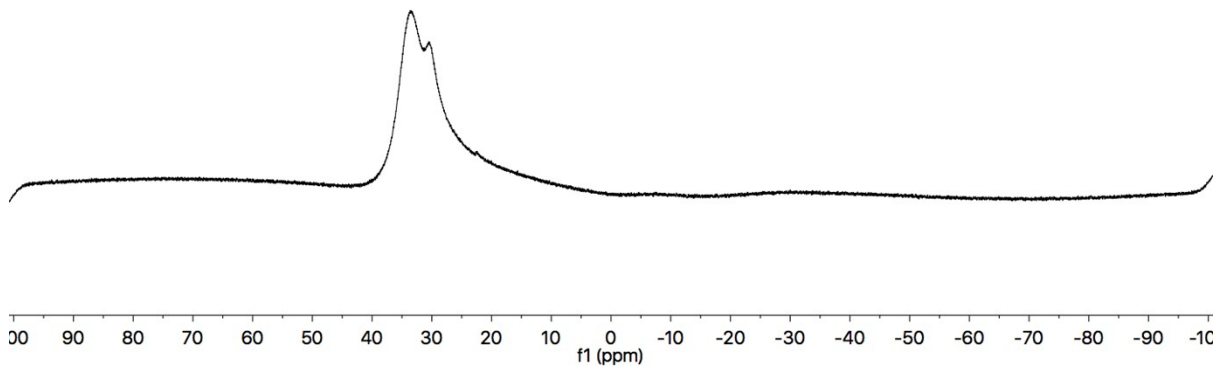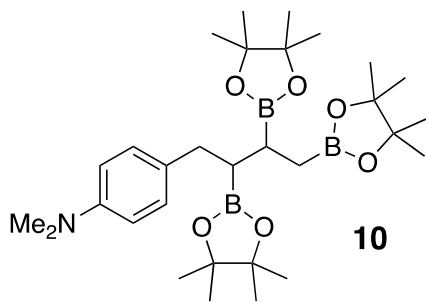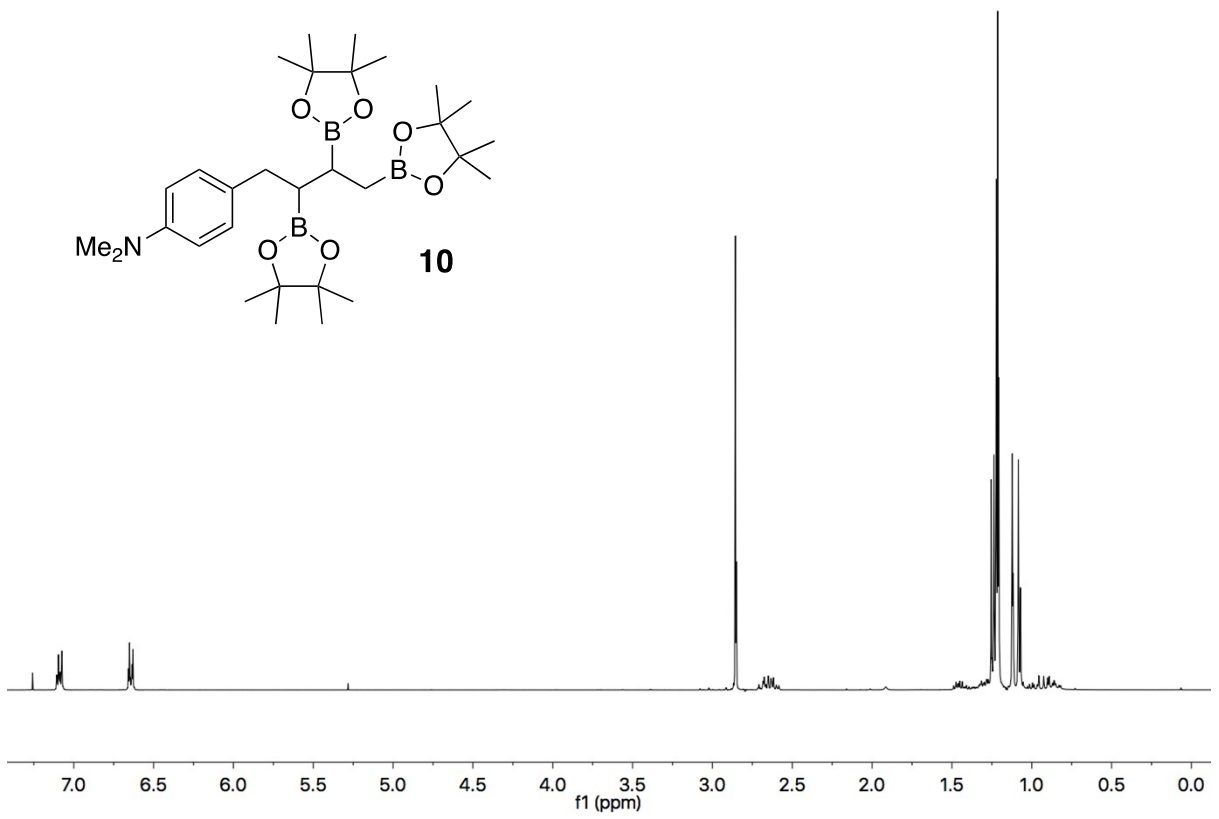

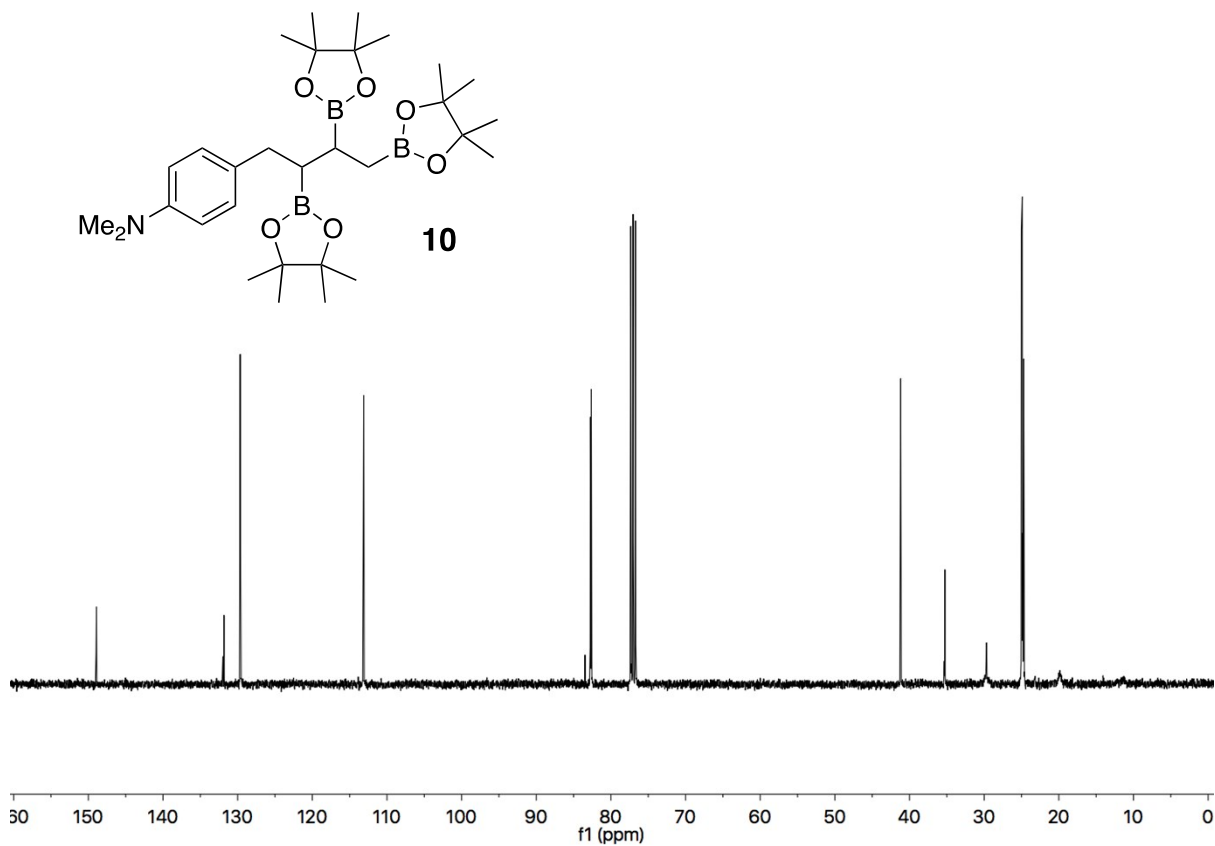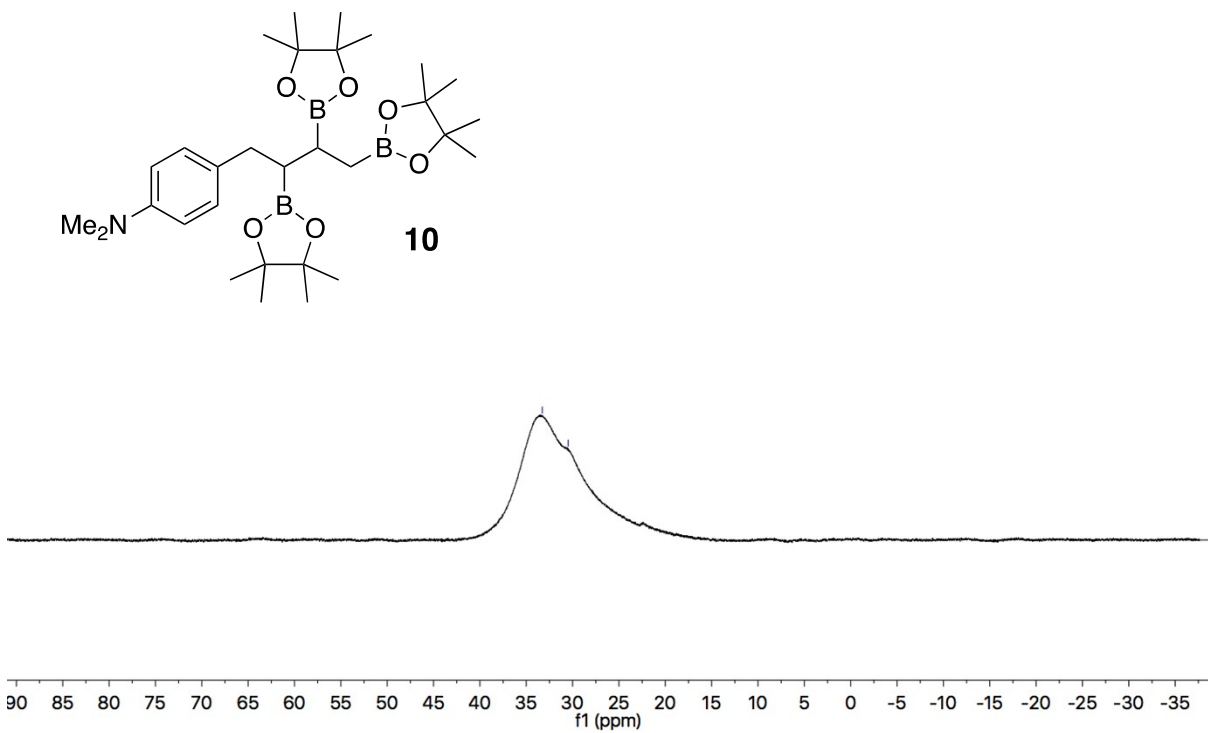

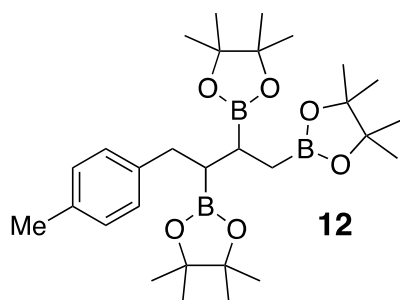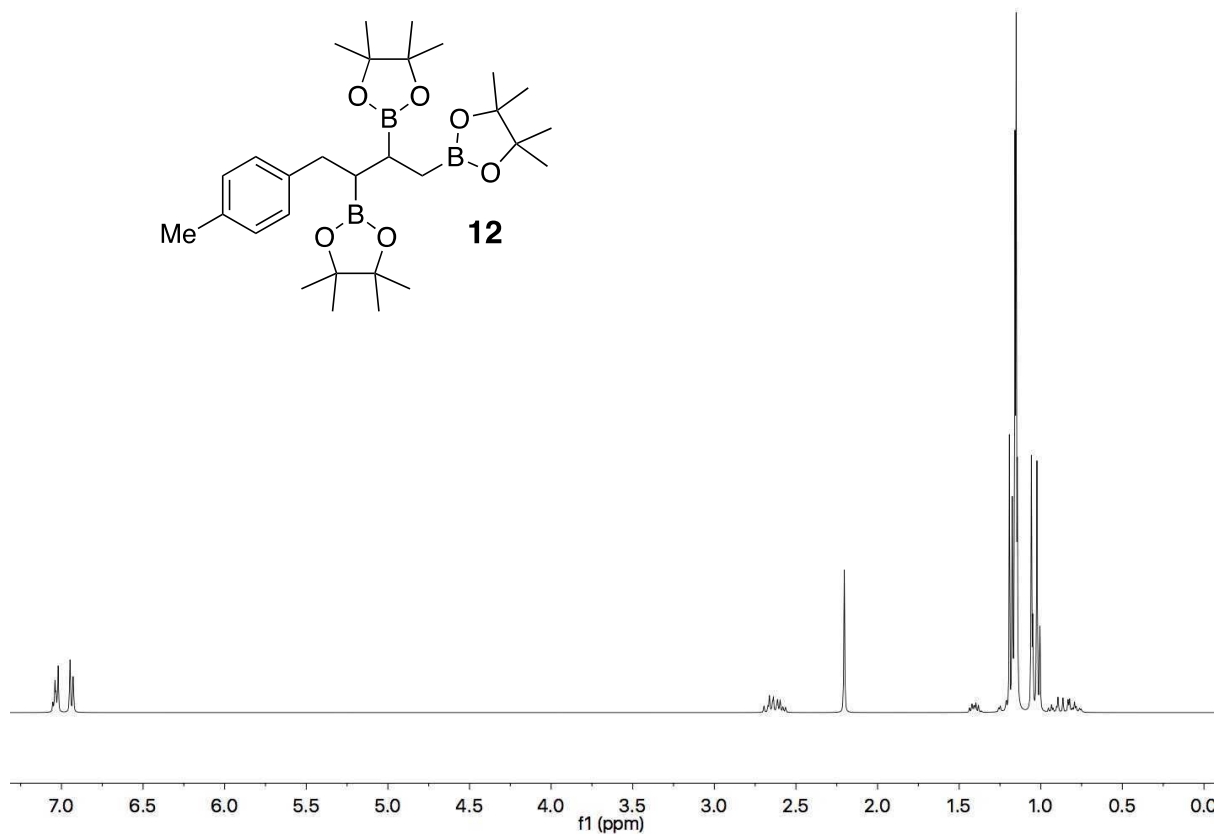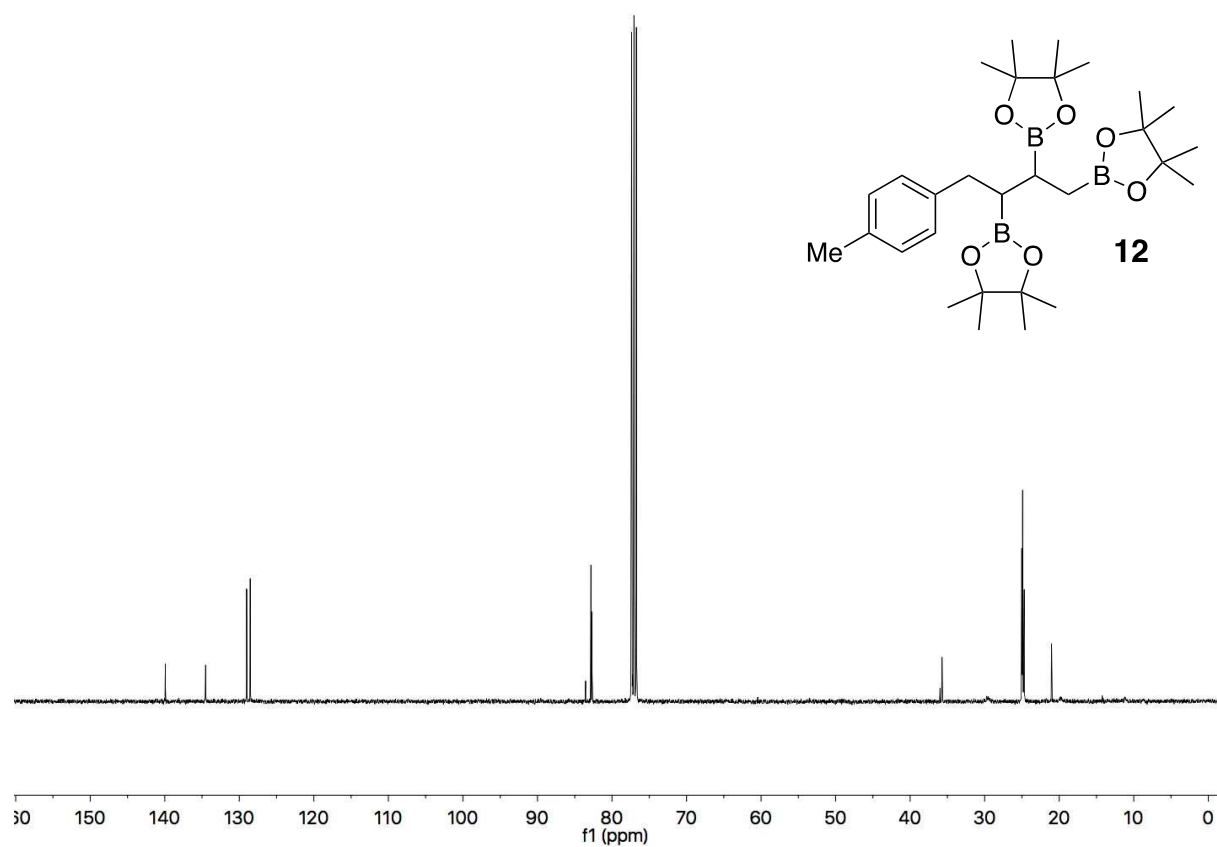







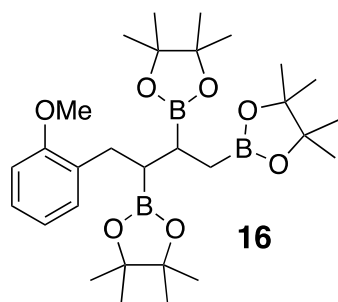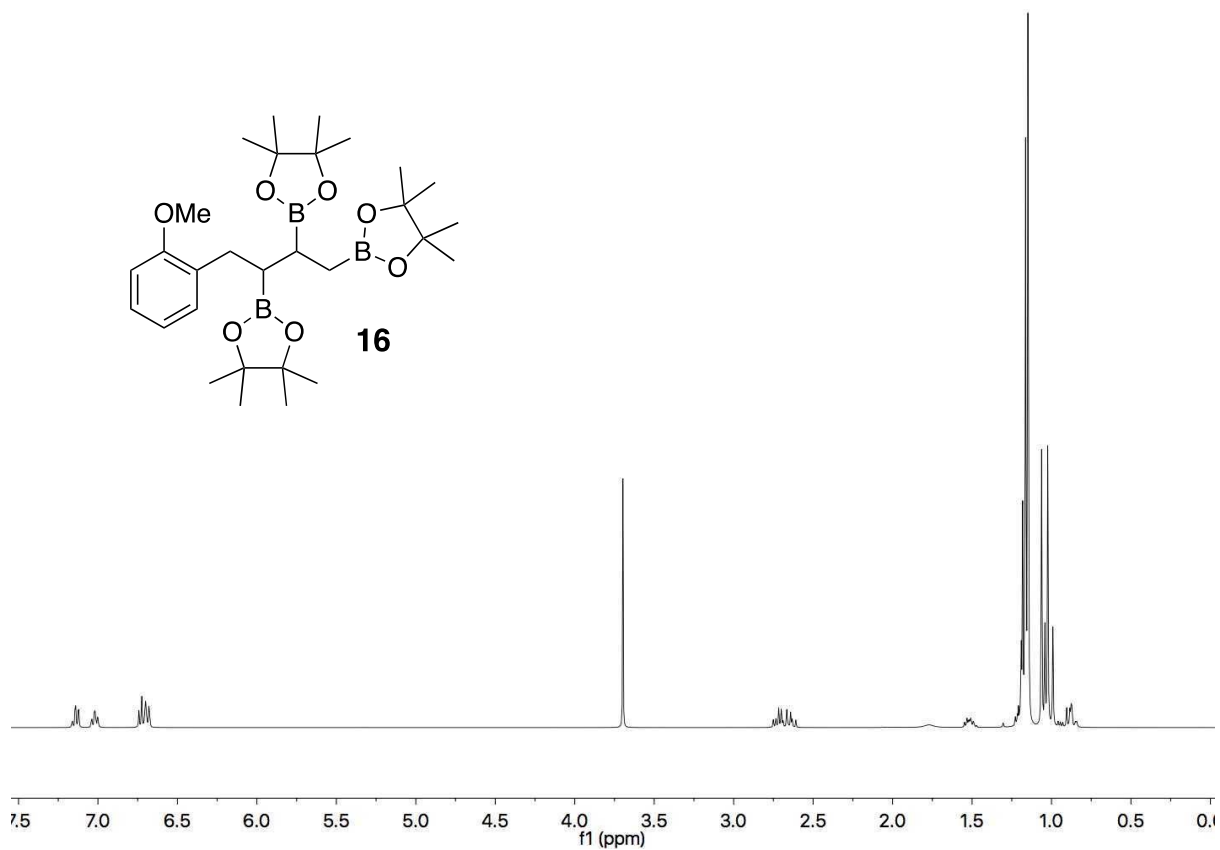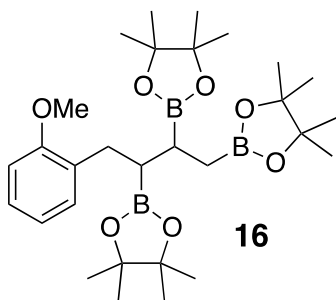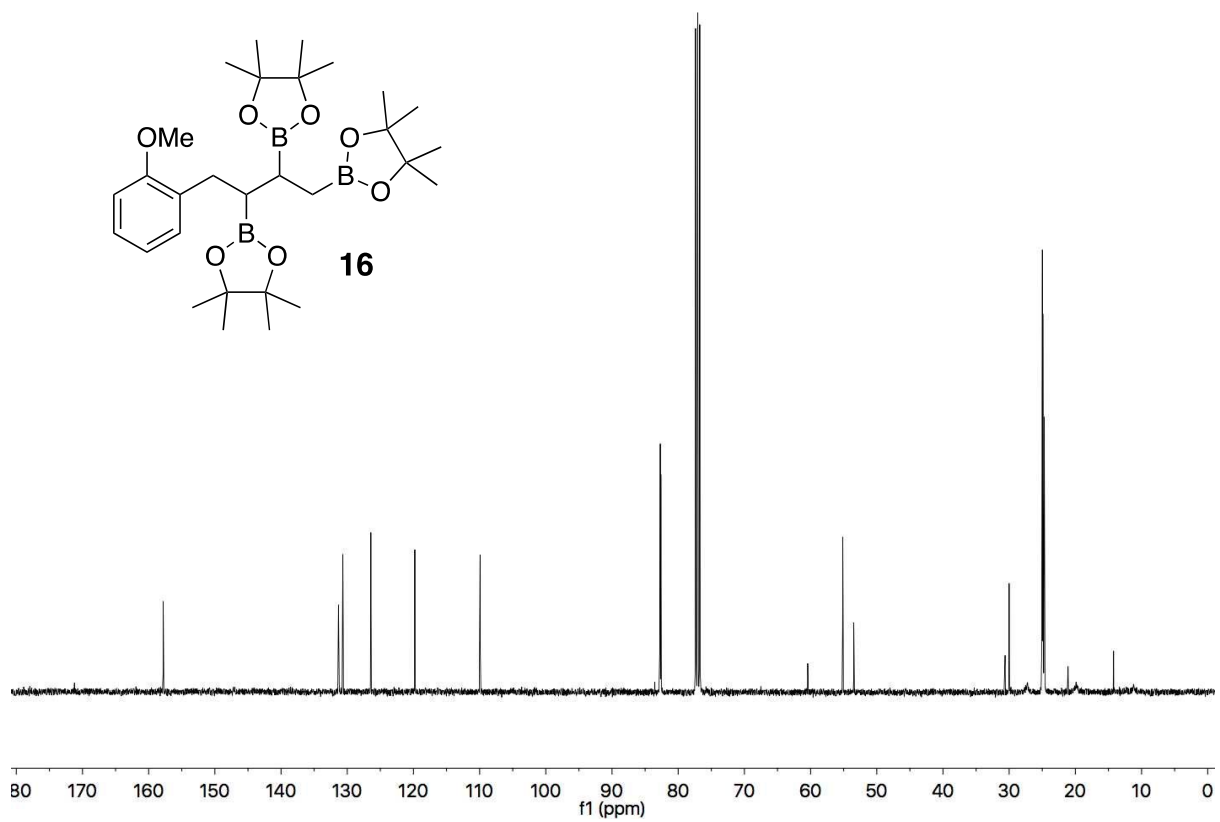

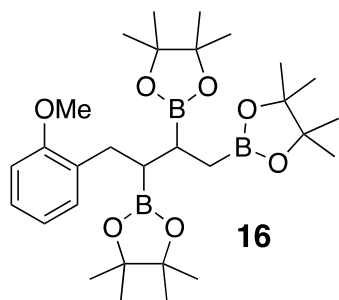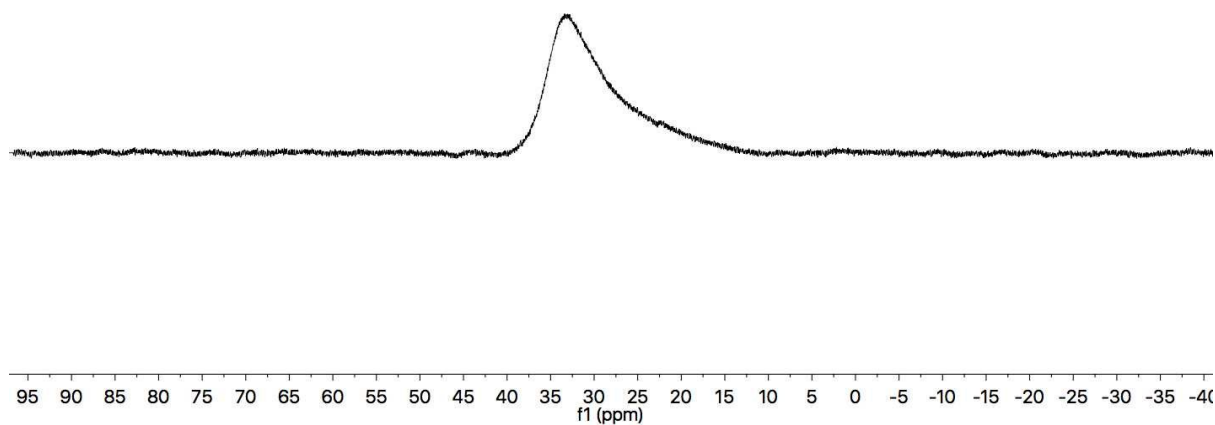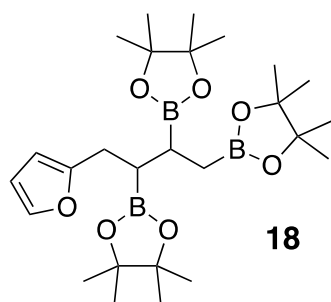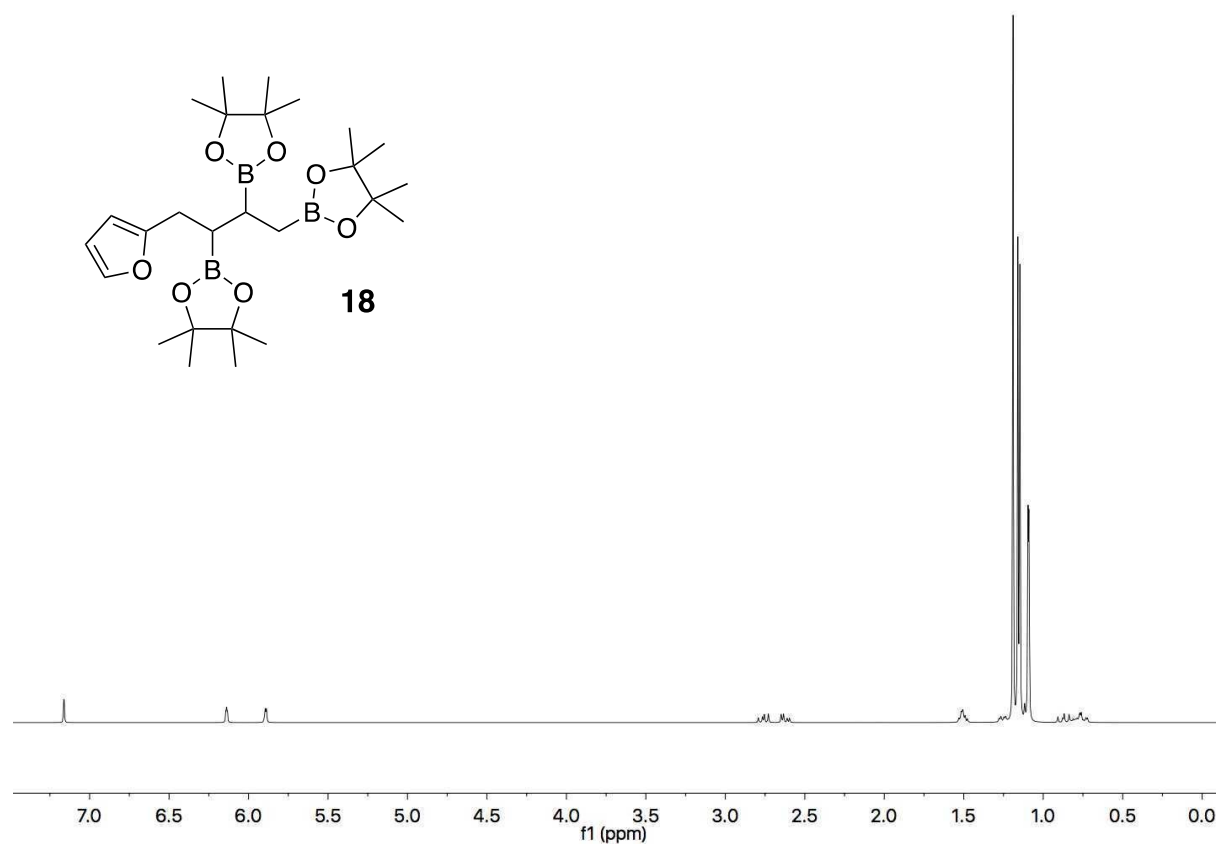

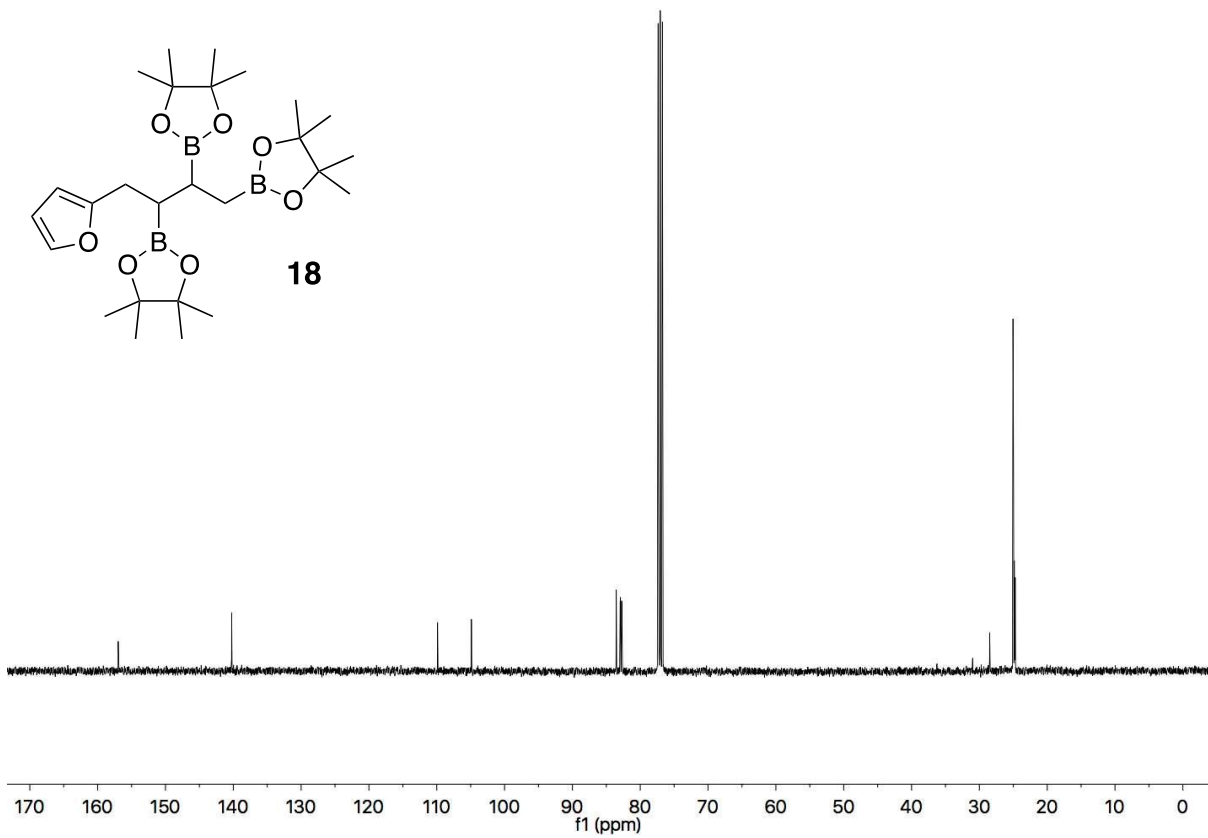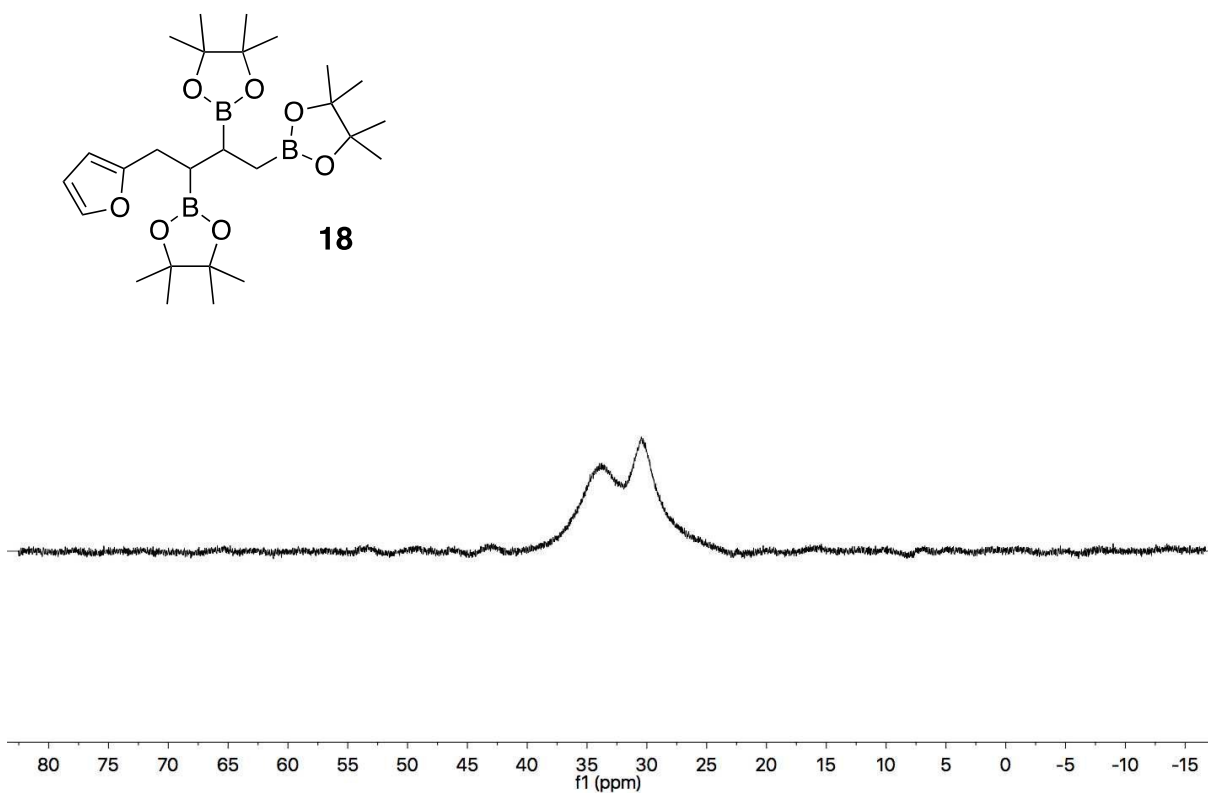

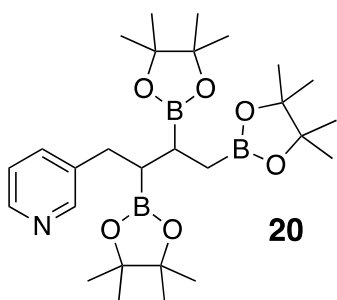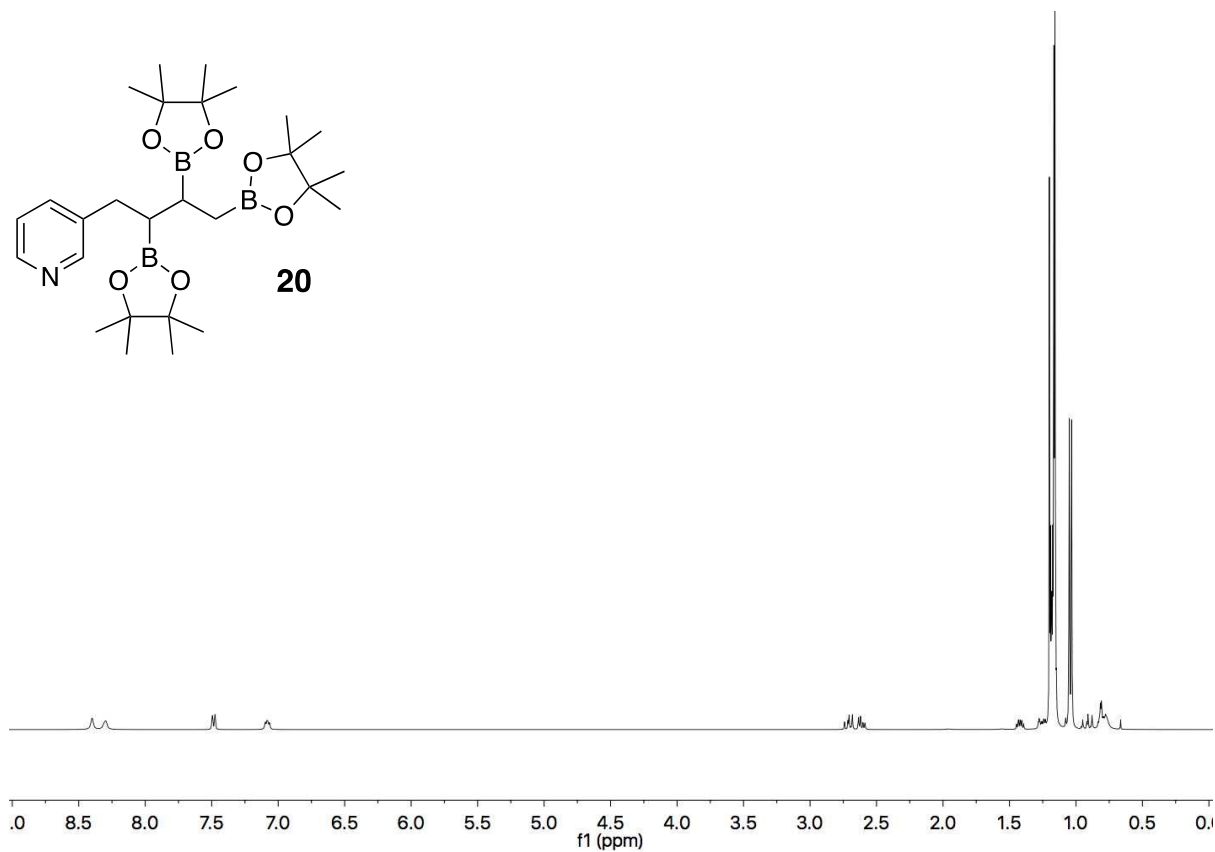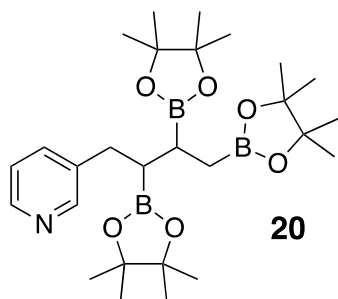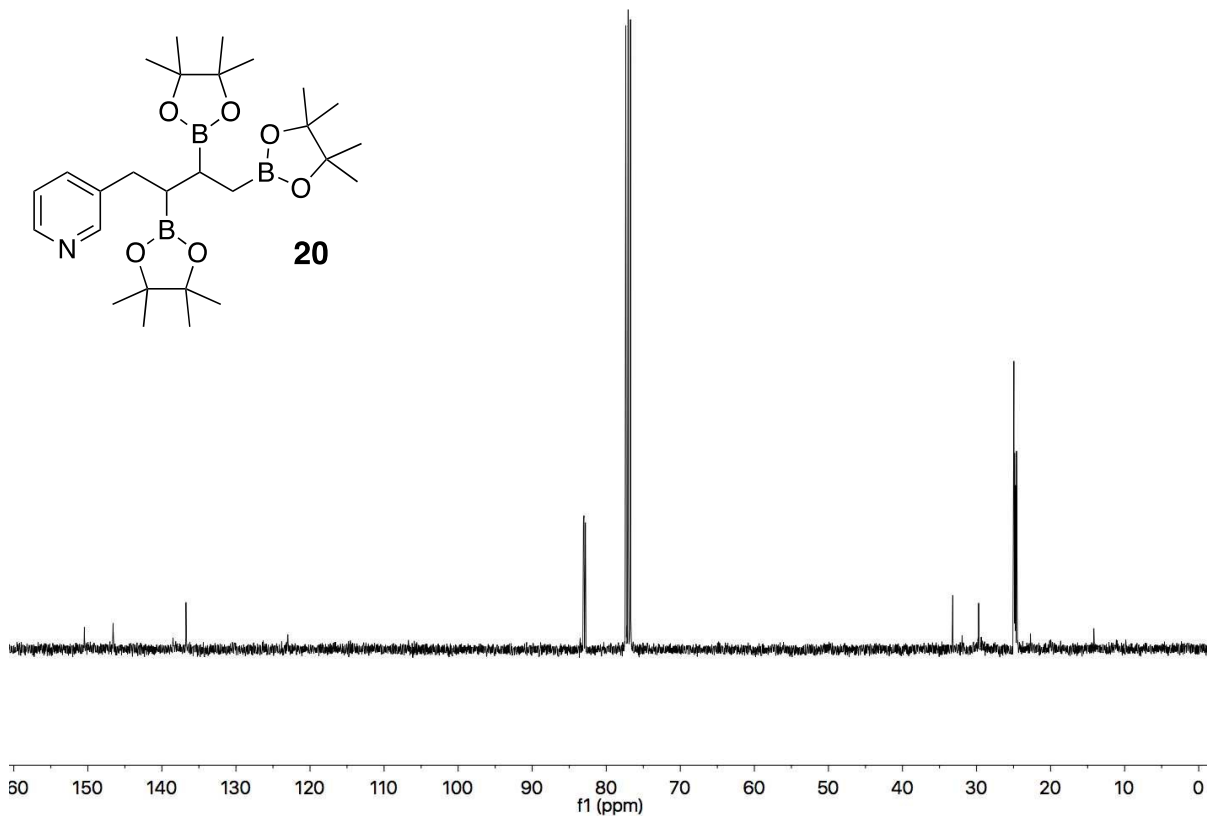

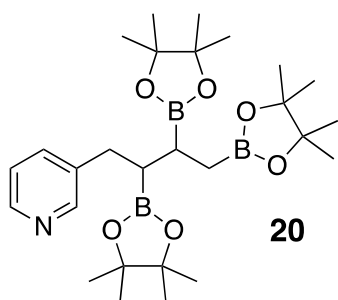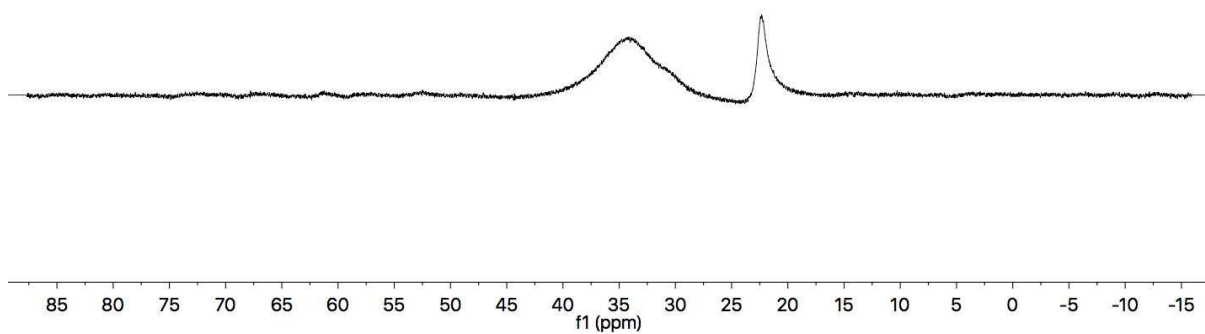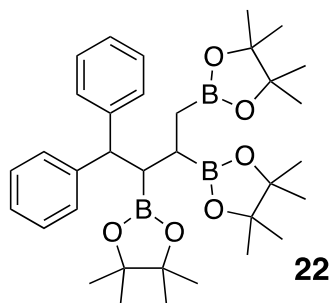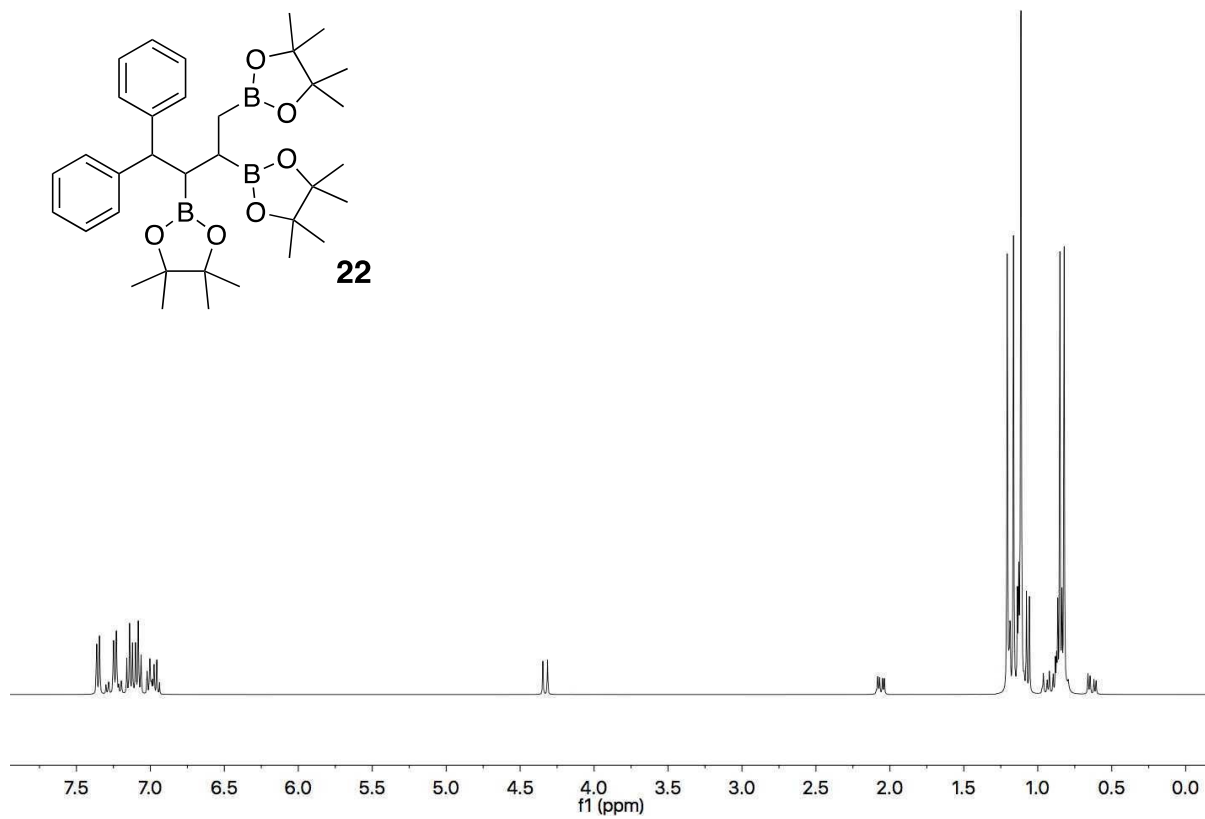

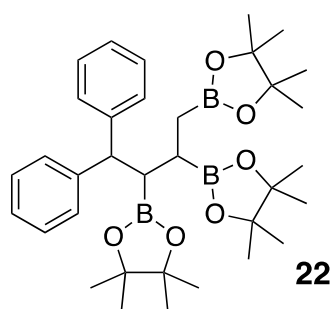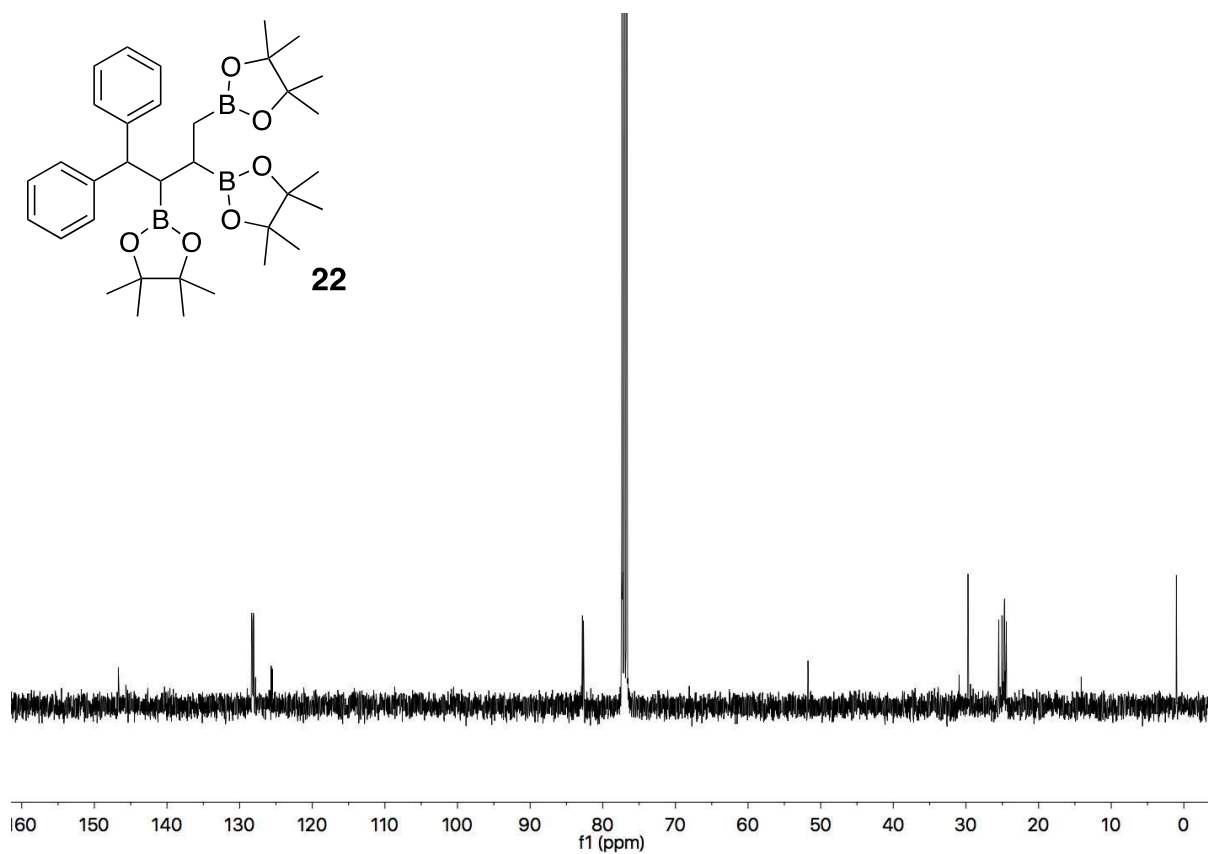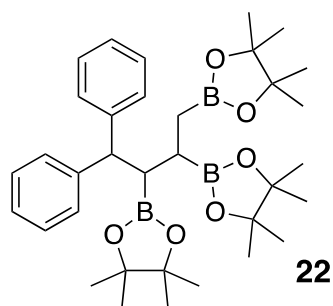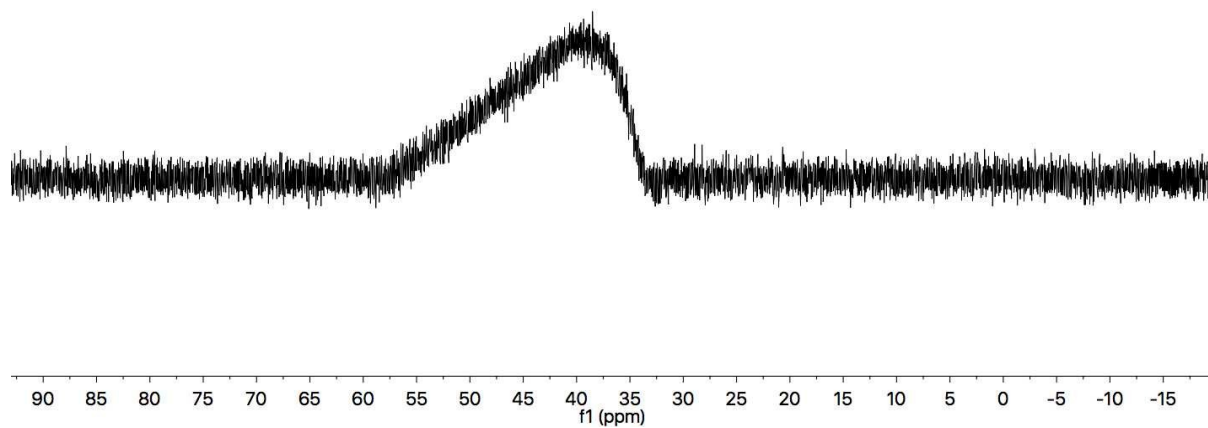







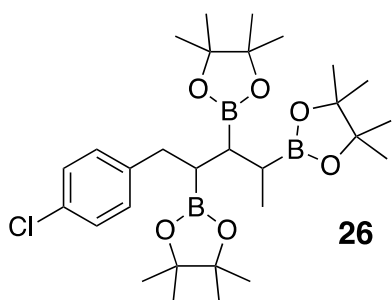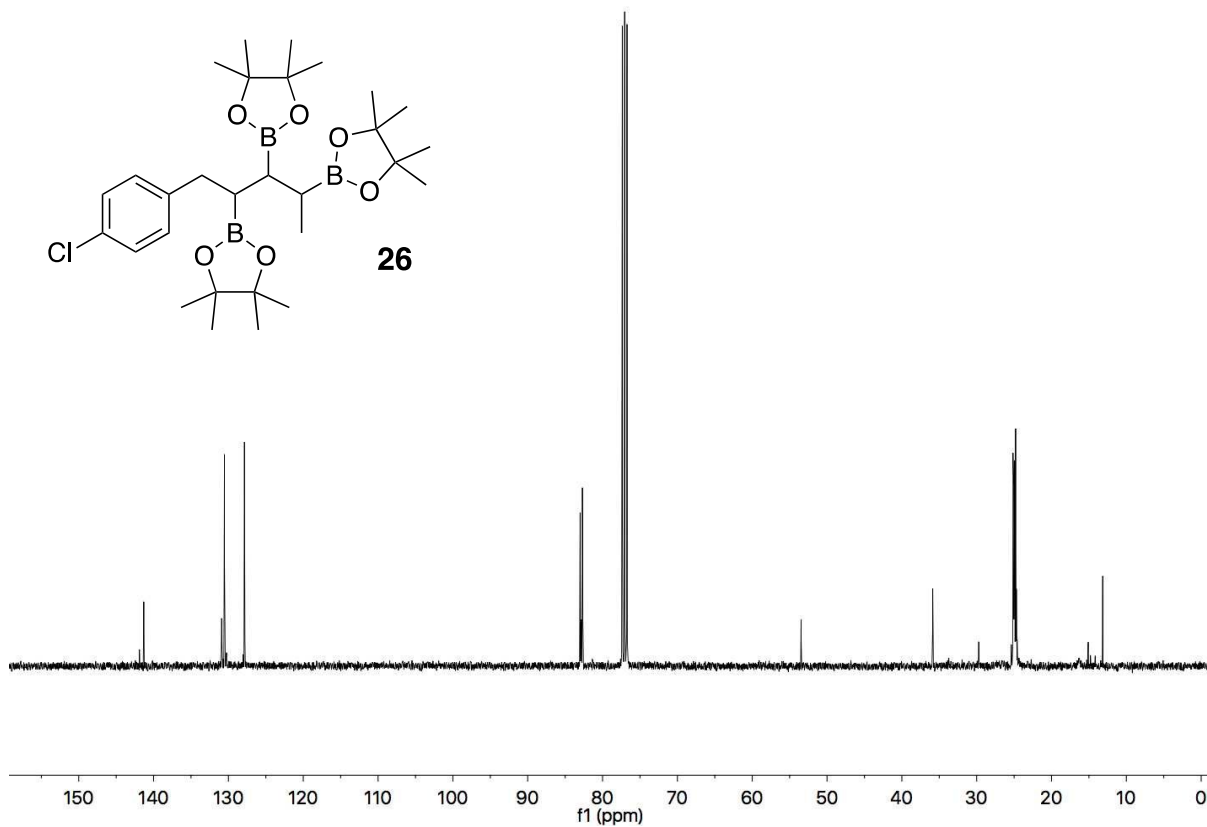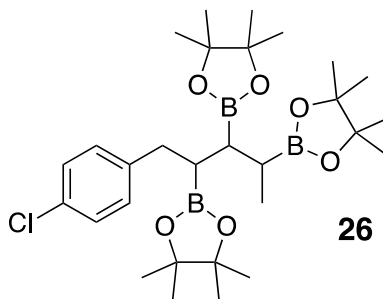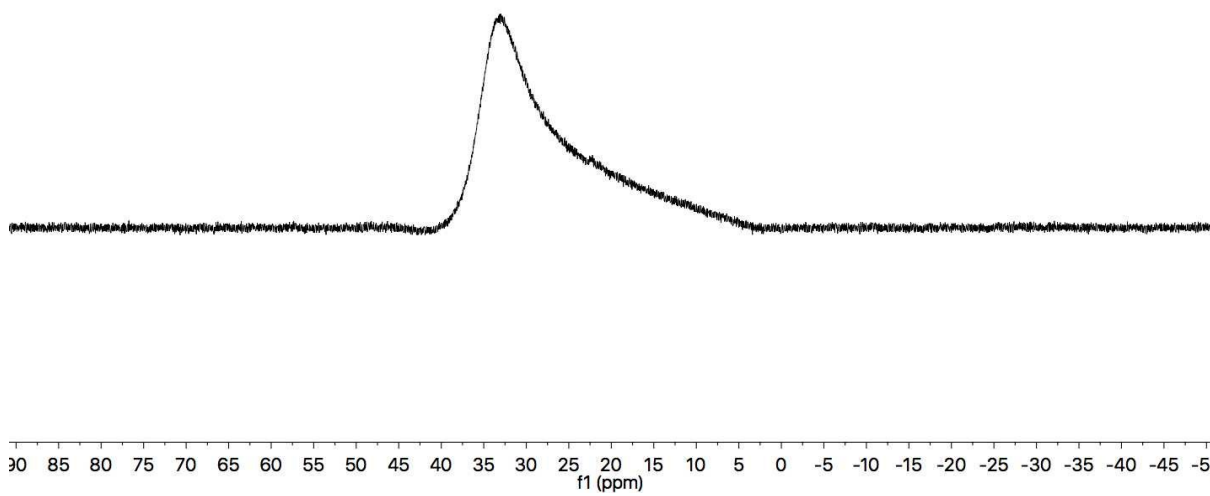



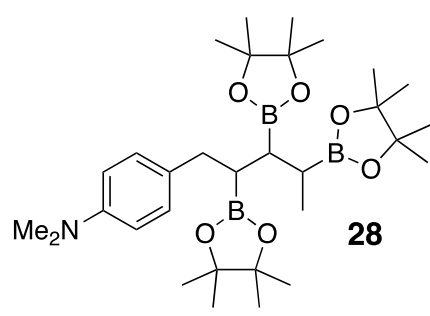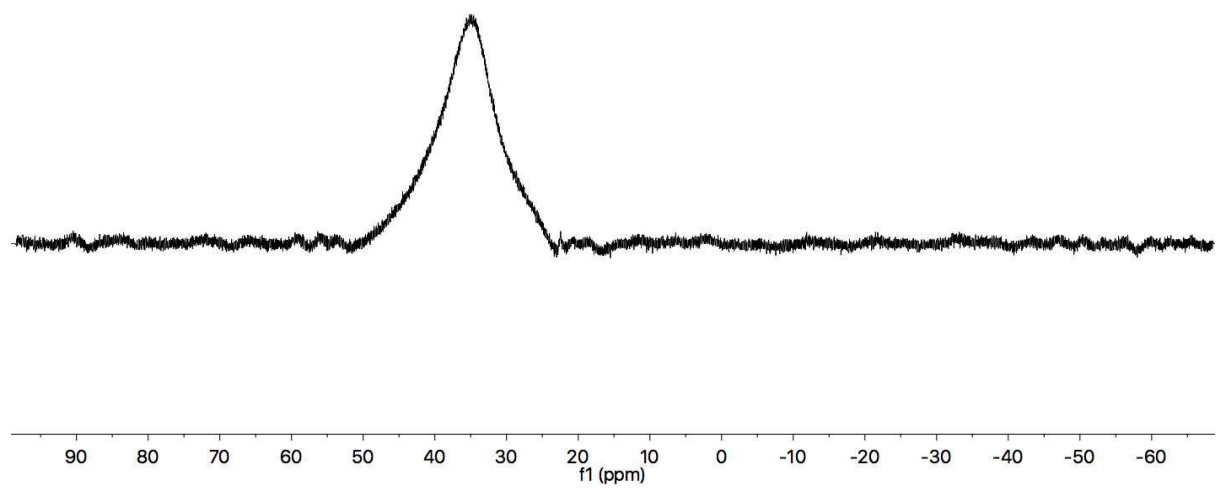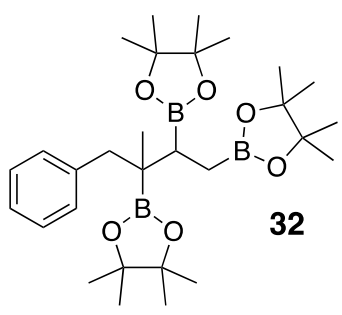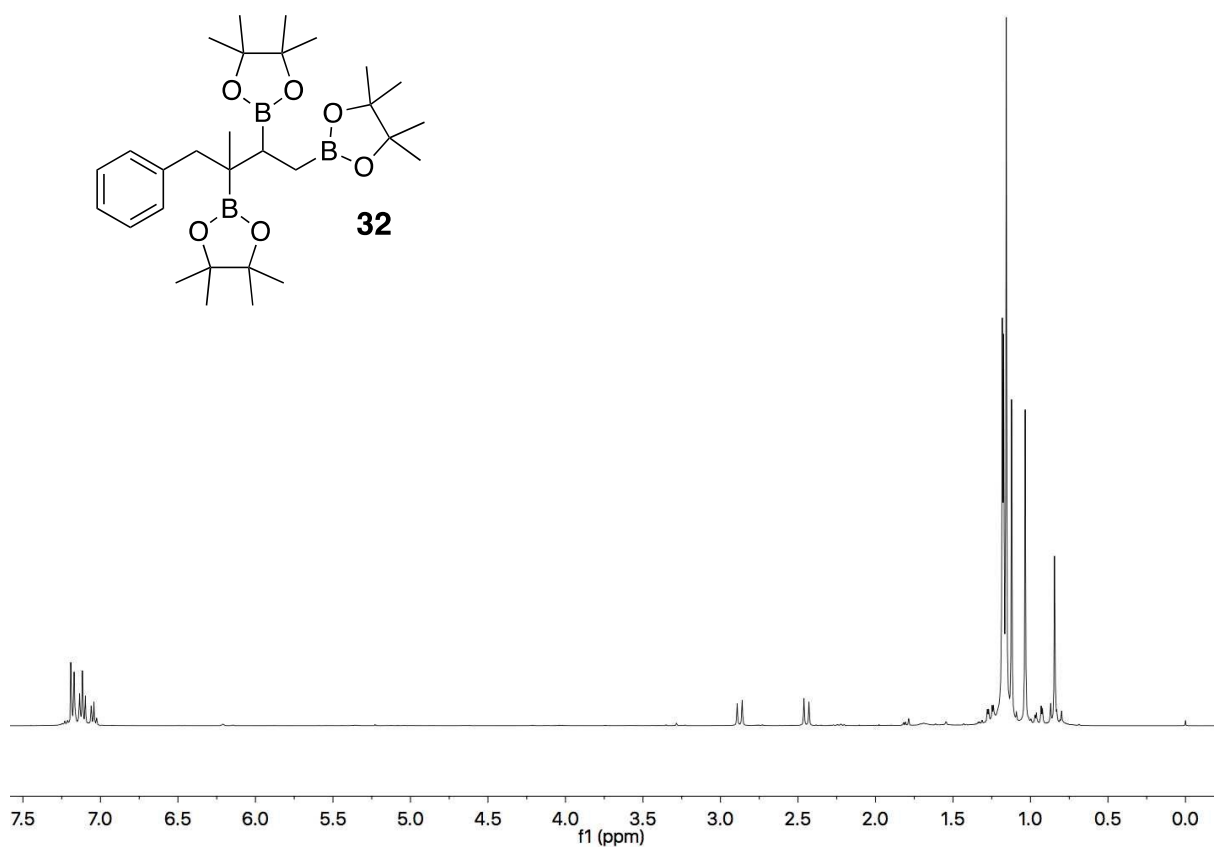



Spectra for Suzuki-Miyaura Cross-Coupling Products:

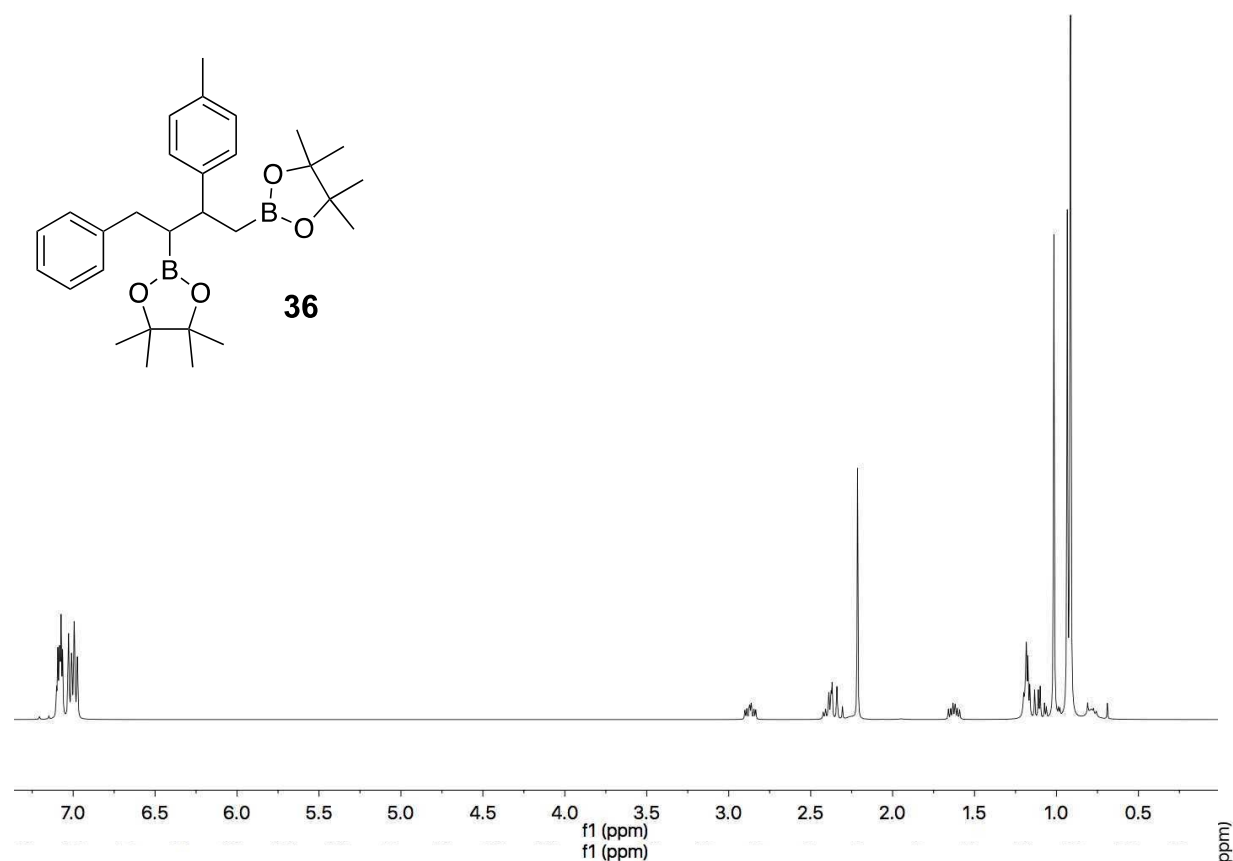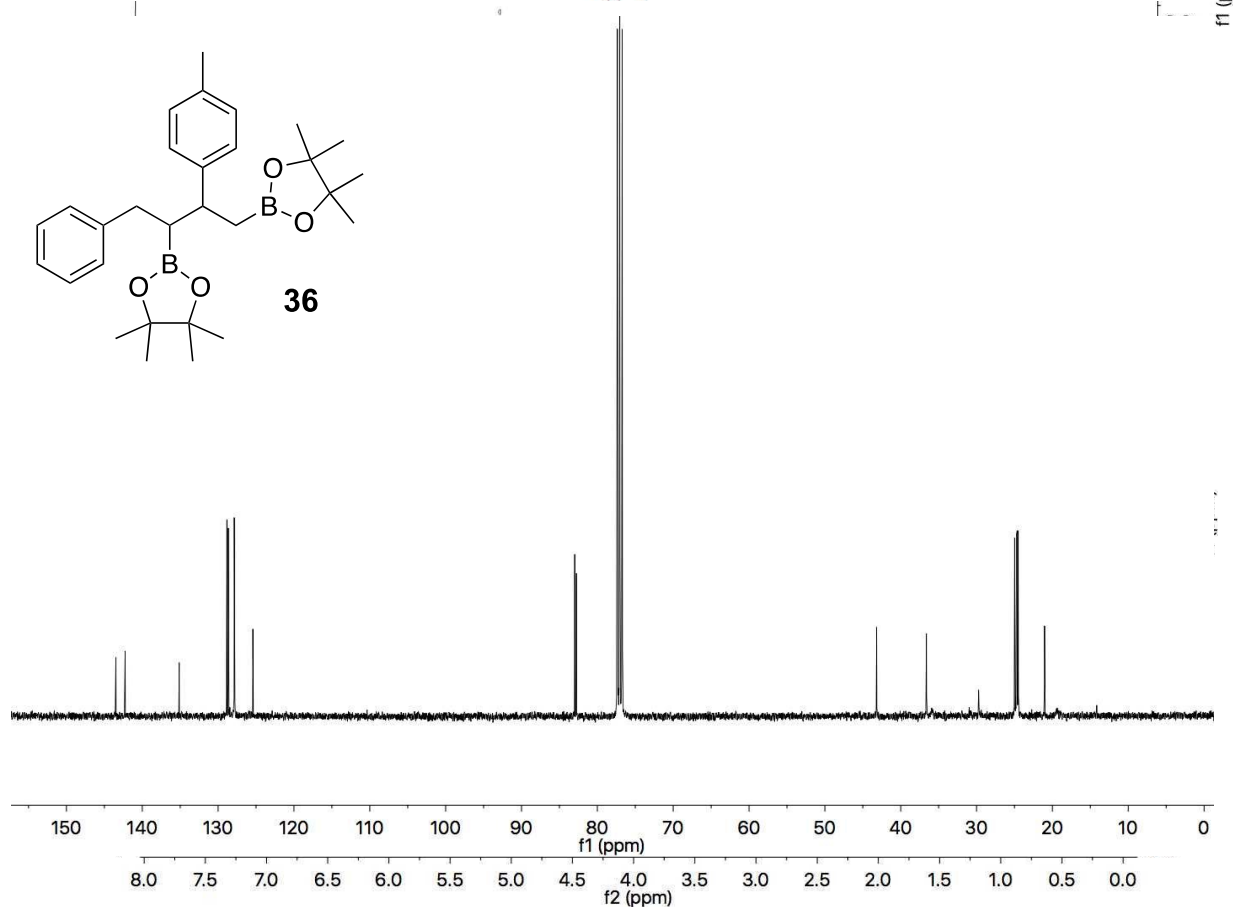

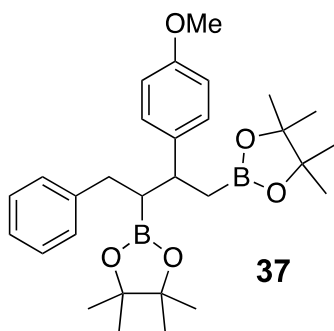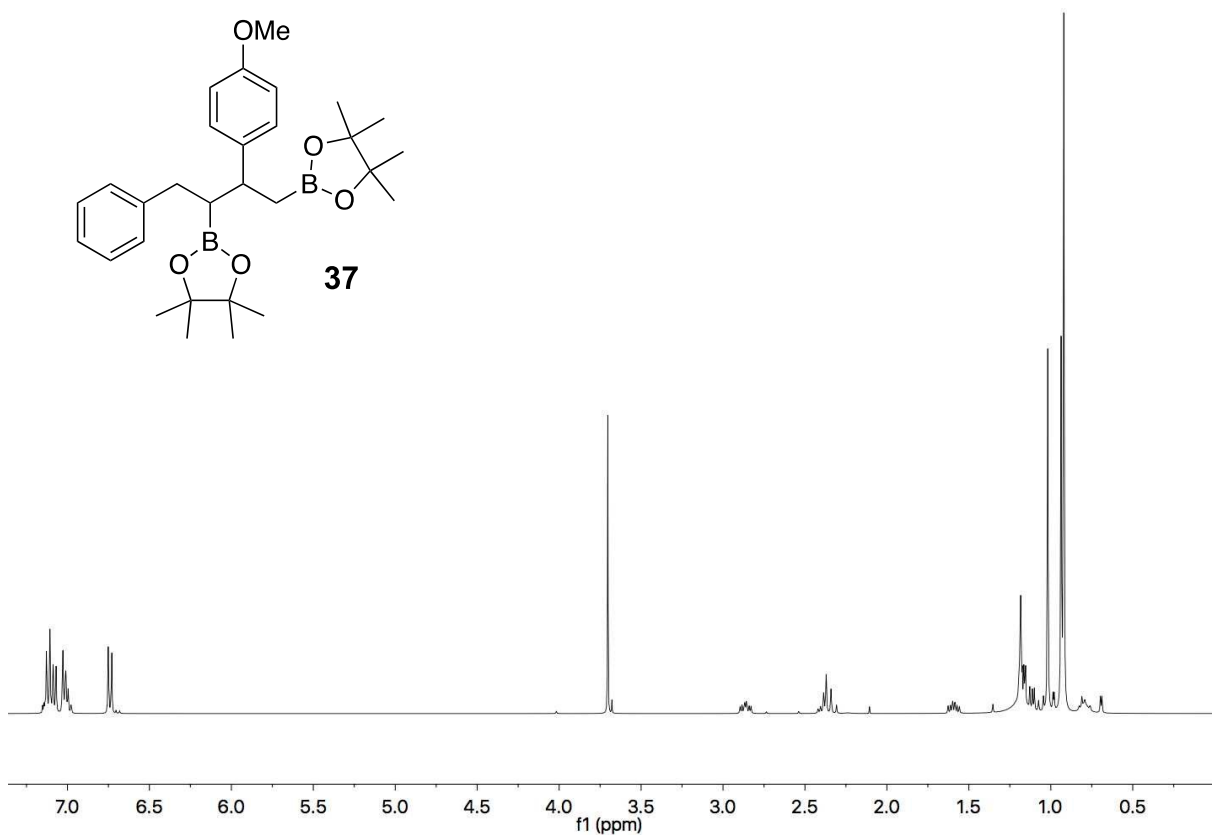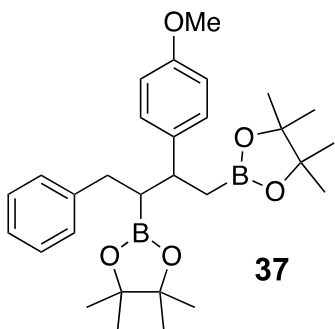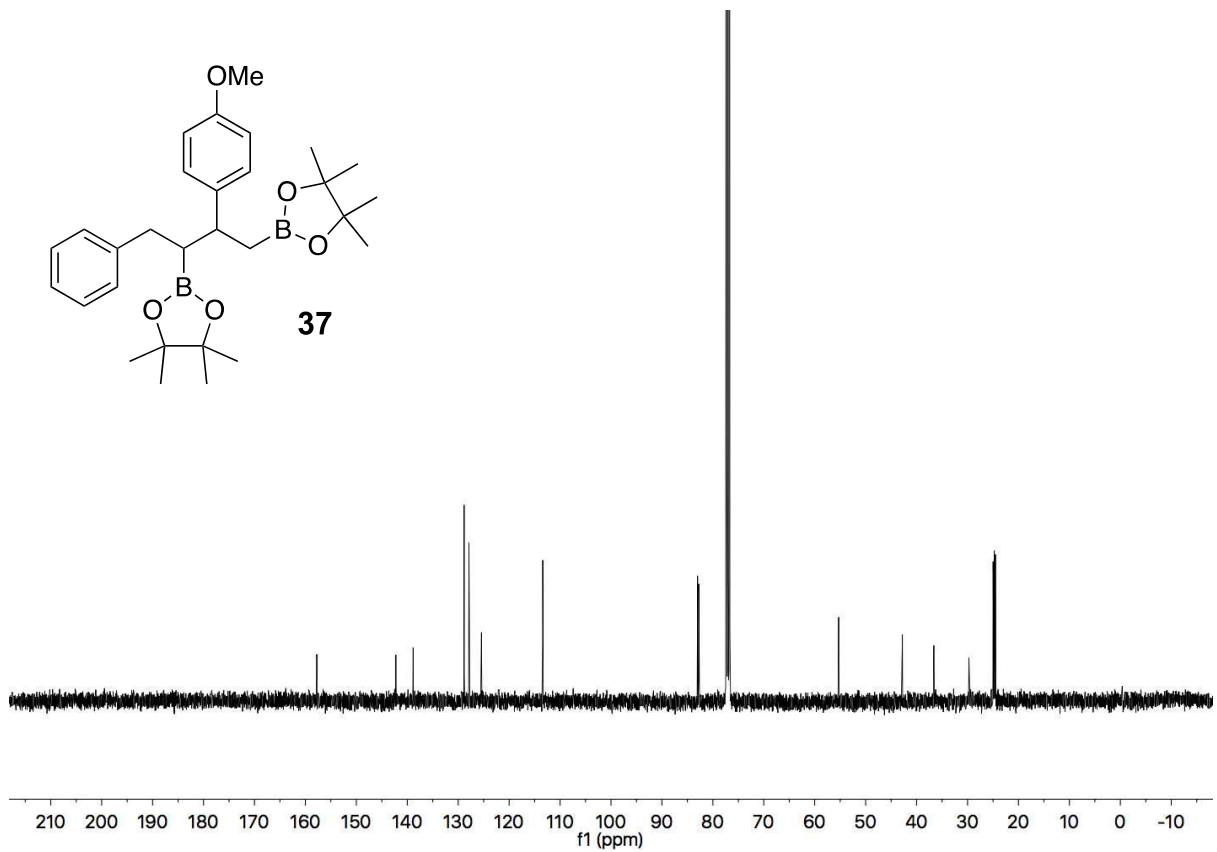

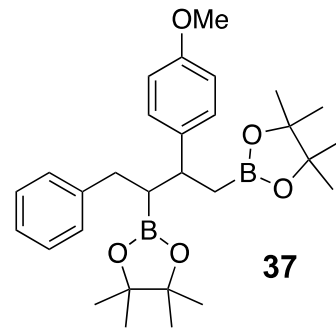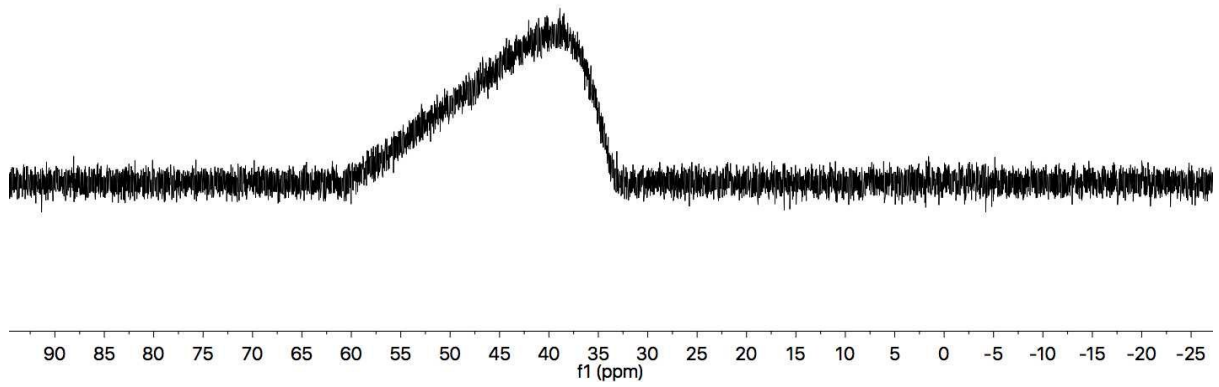

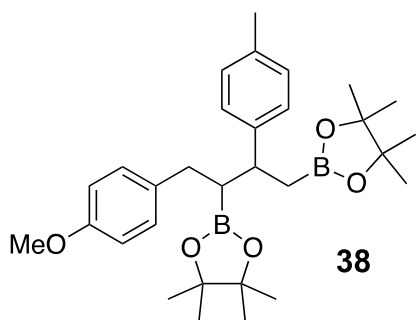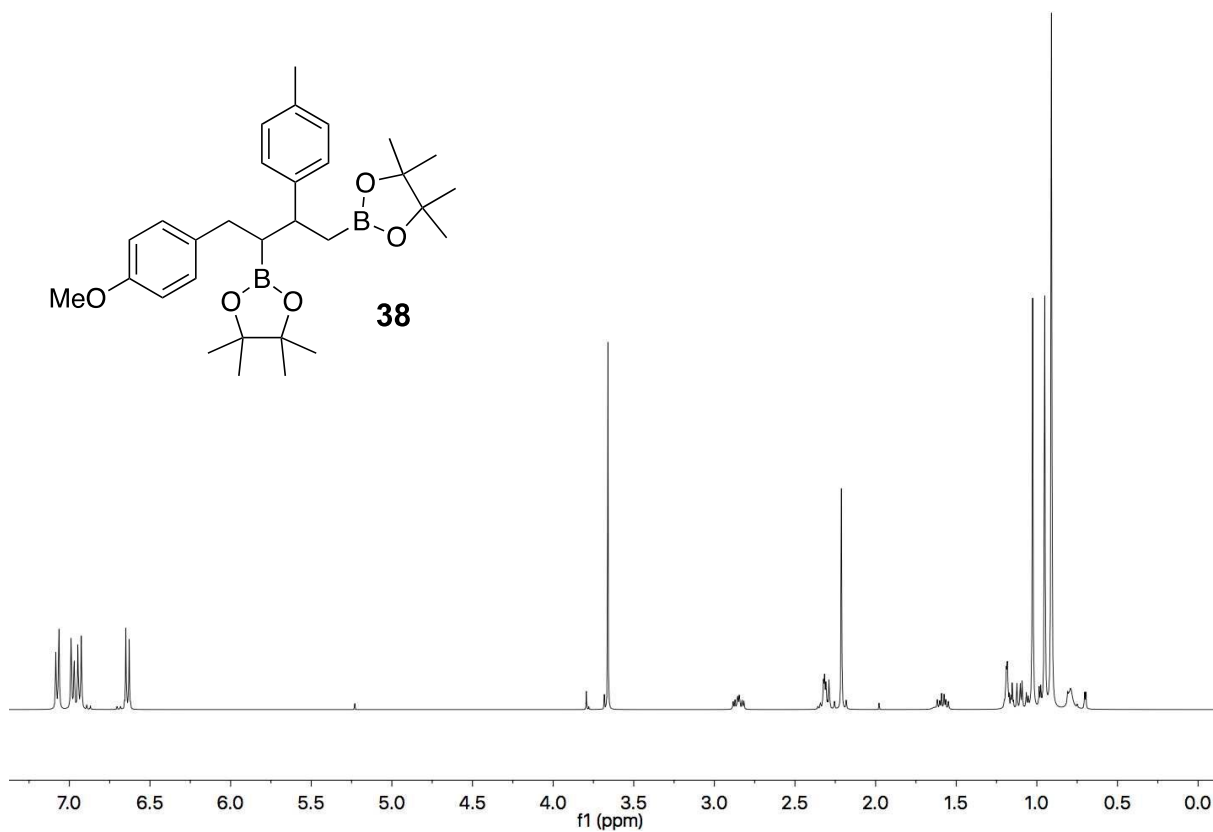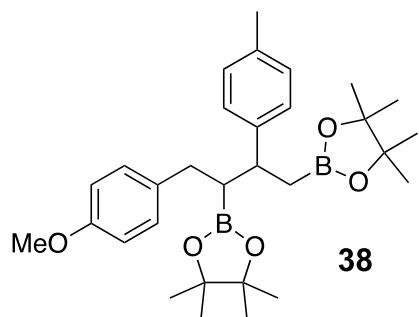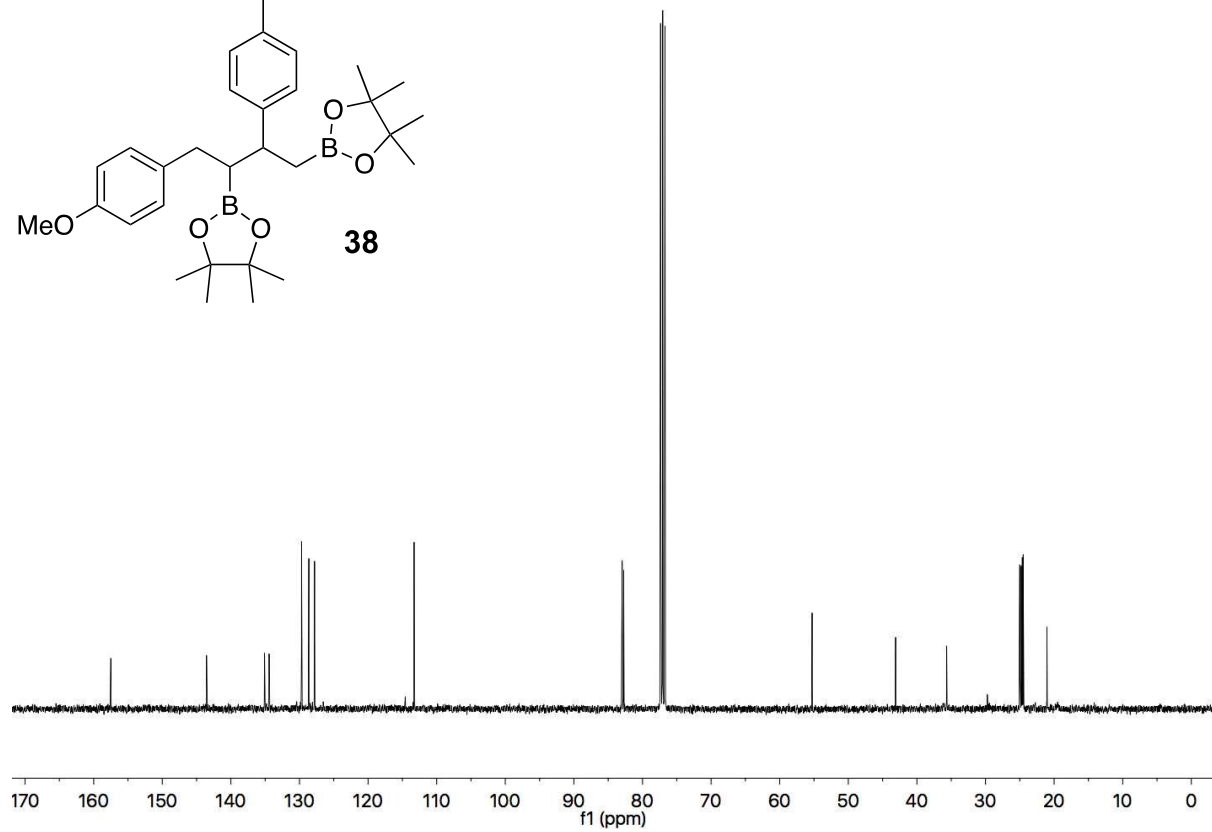



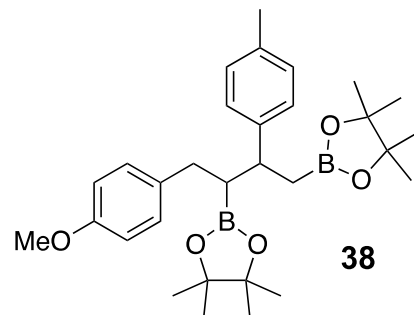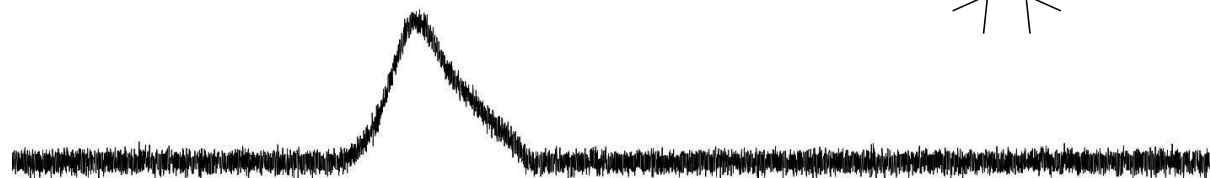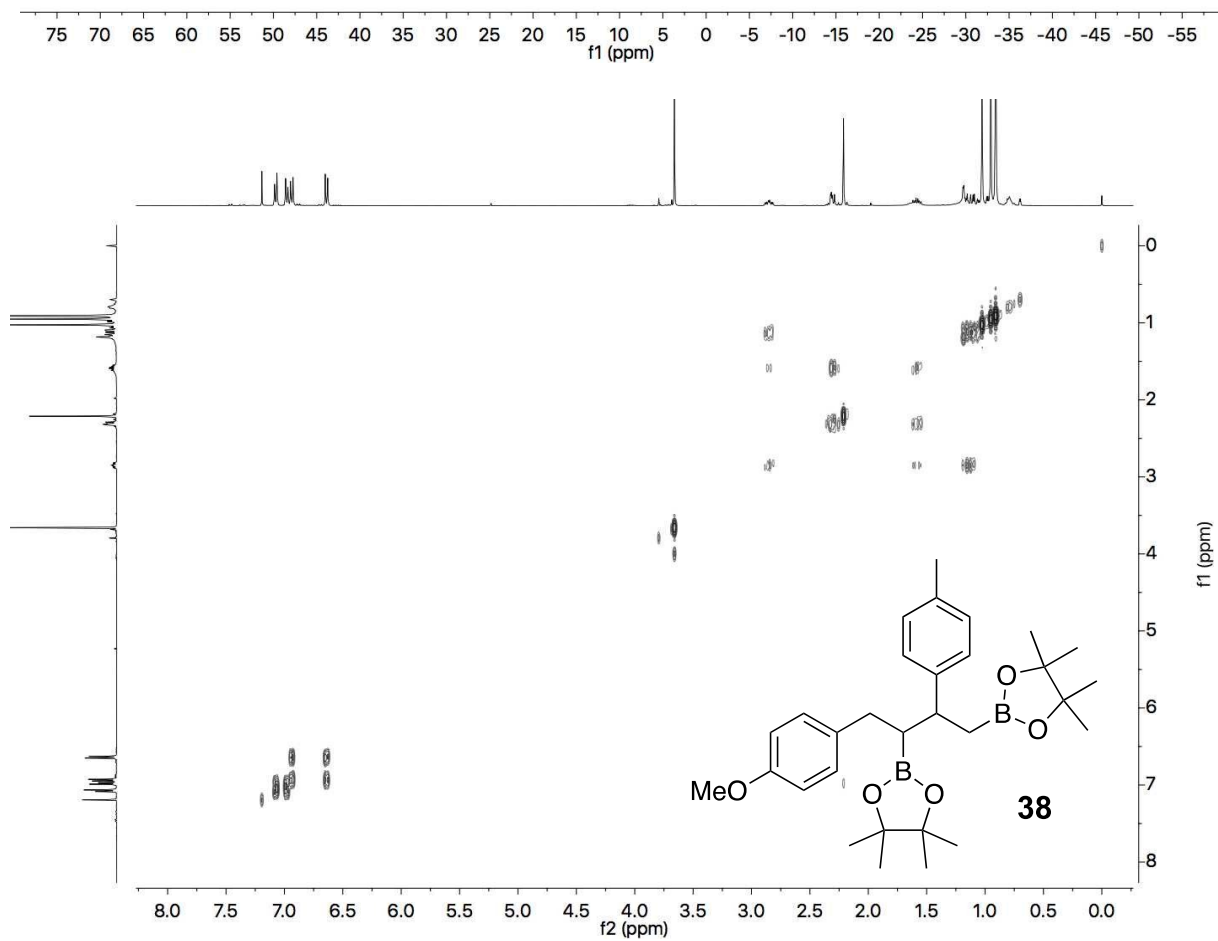

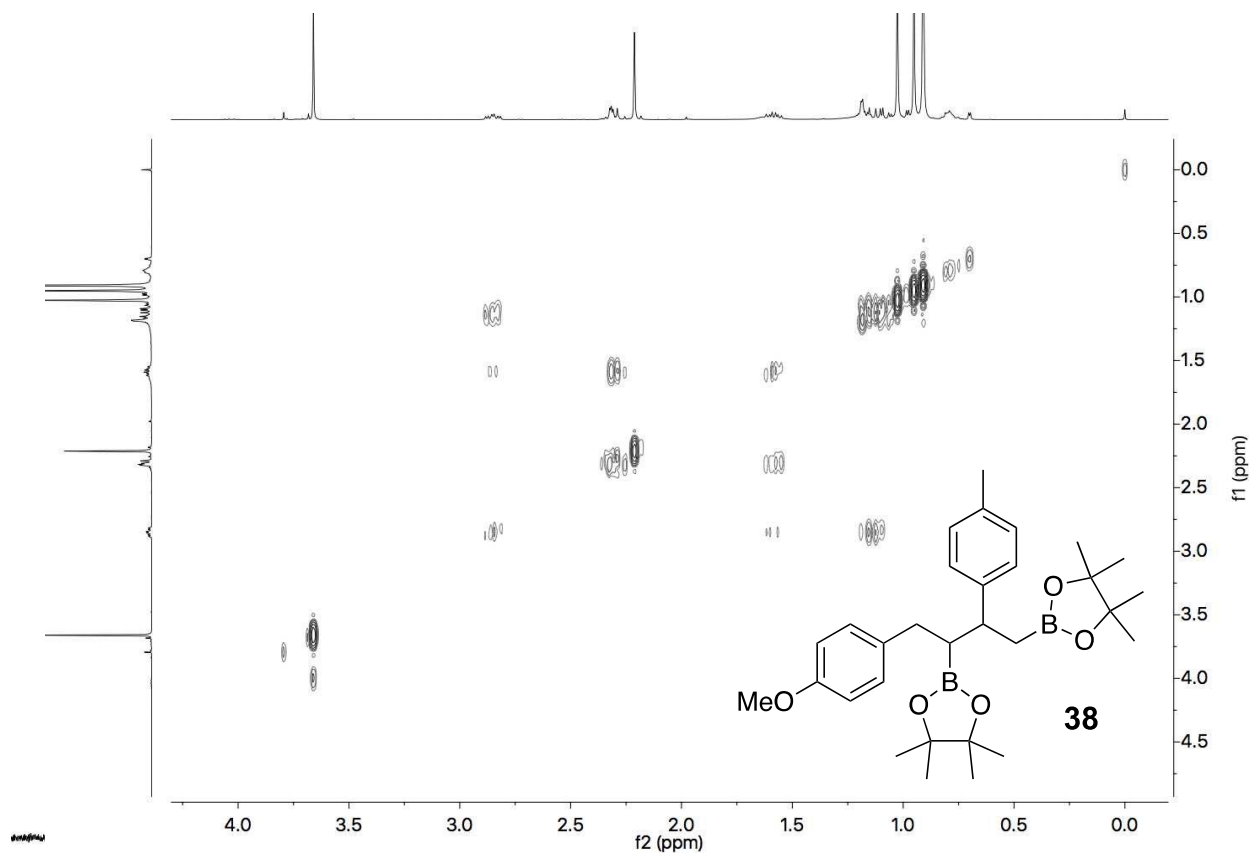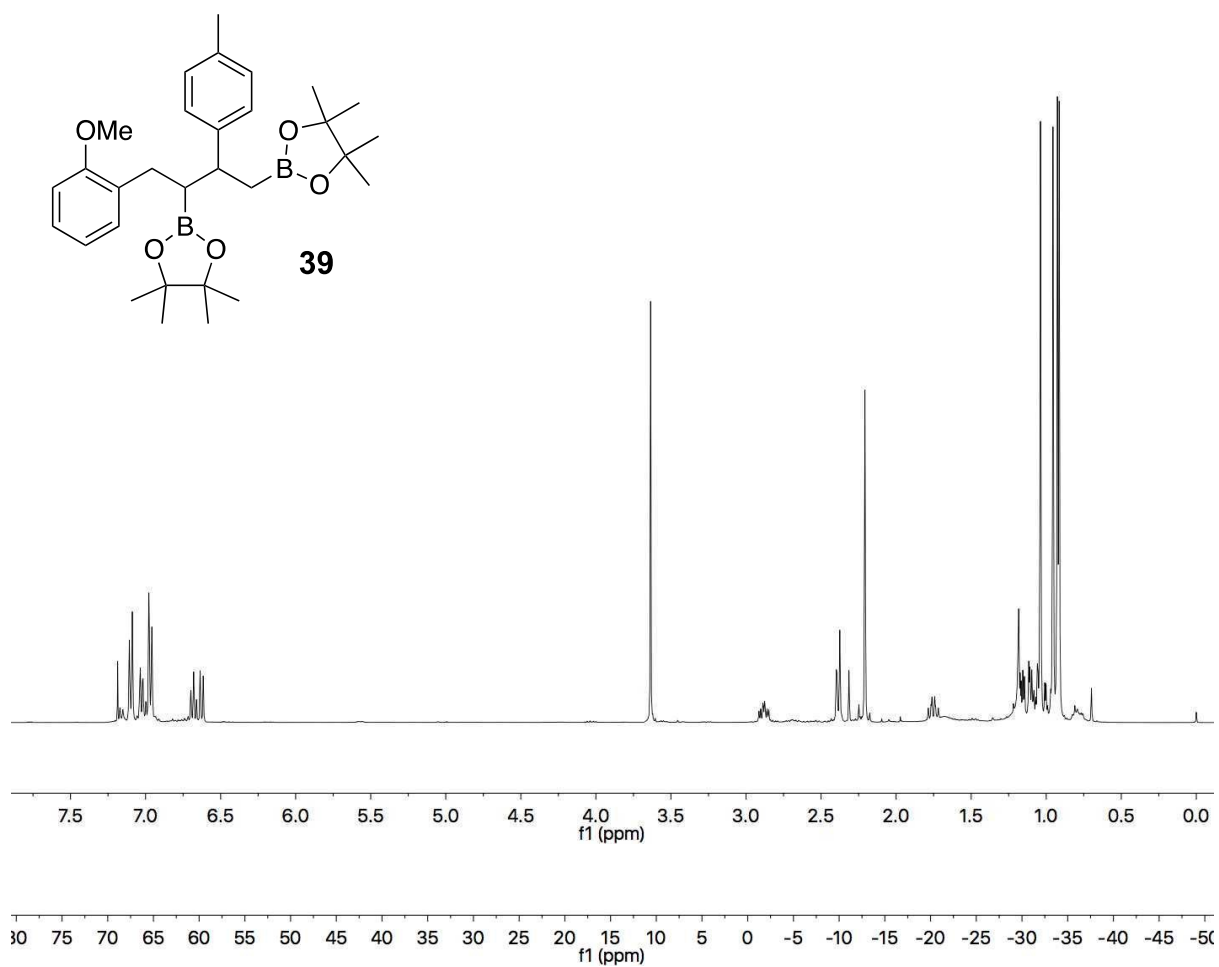

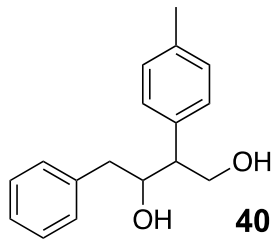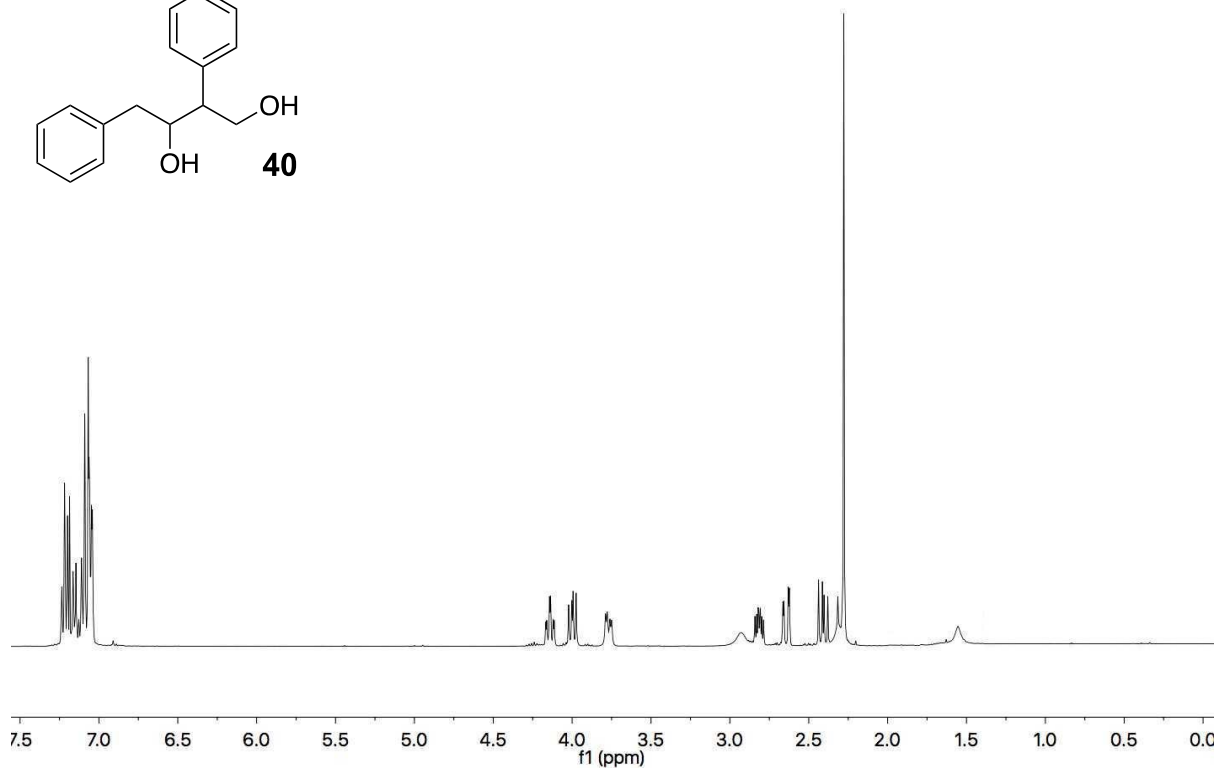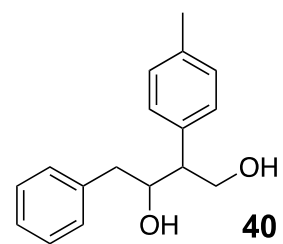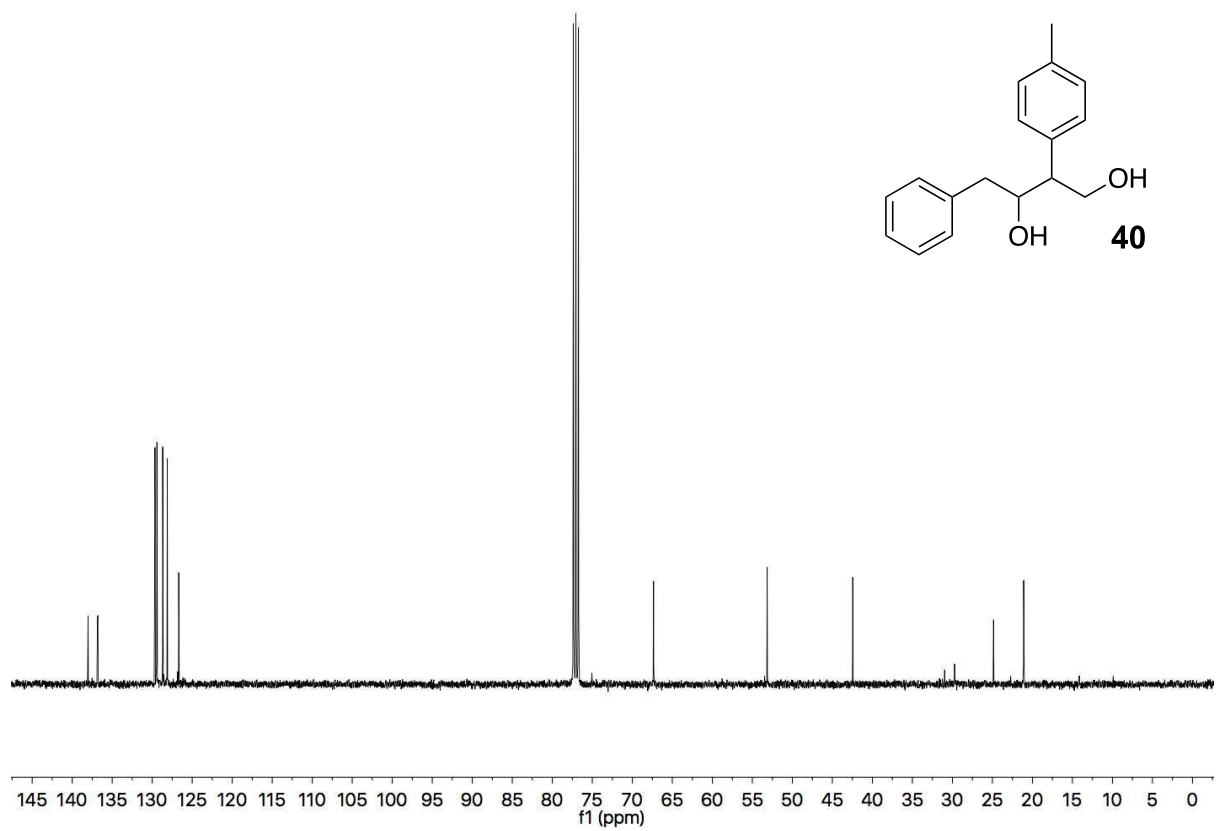

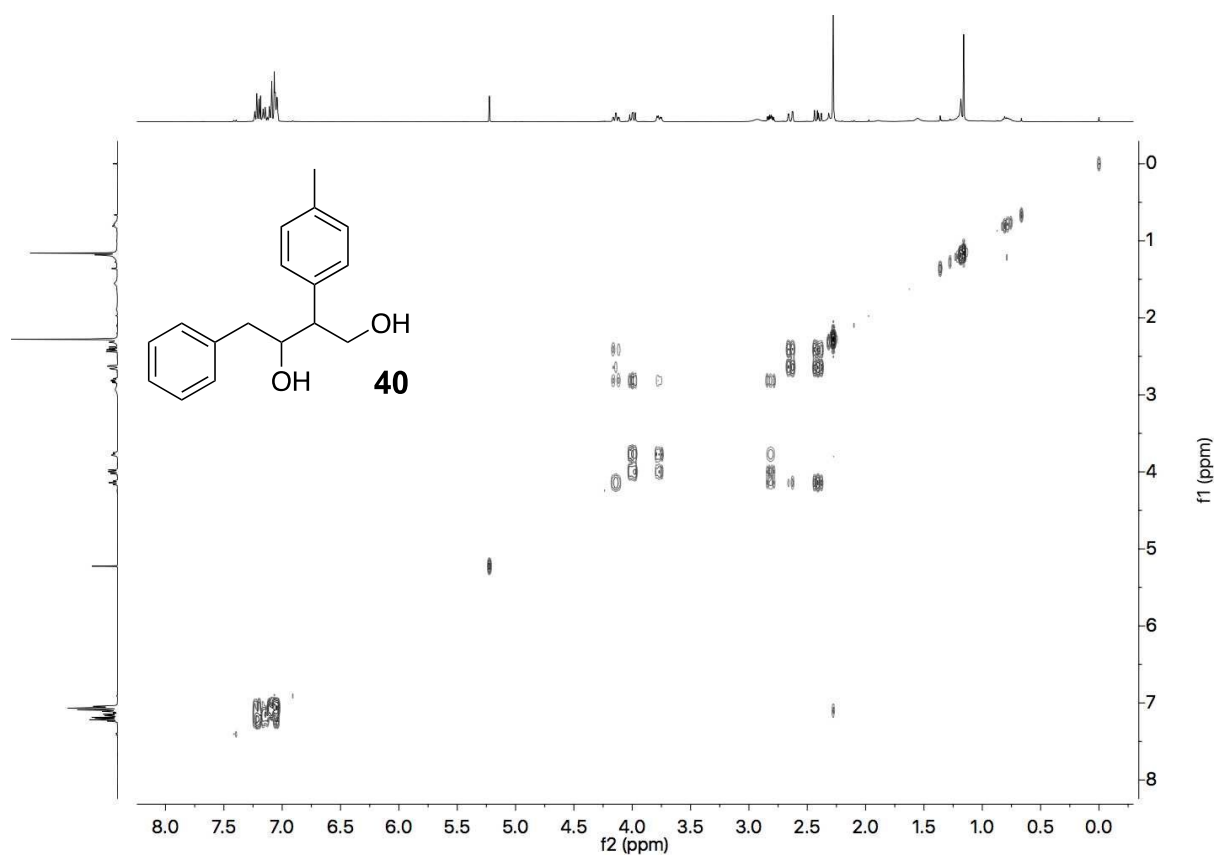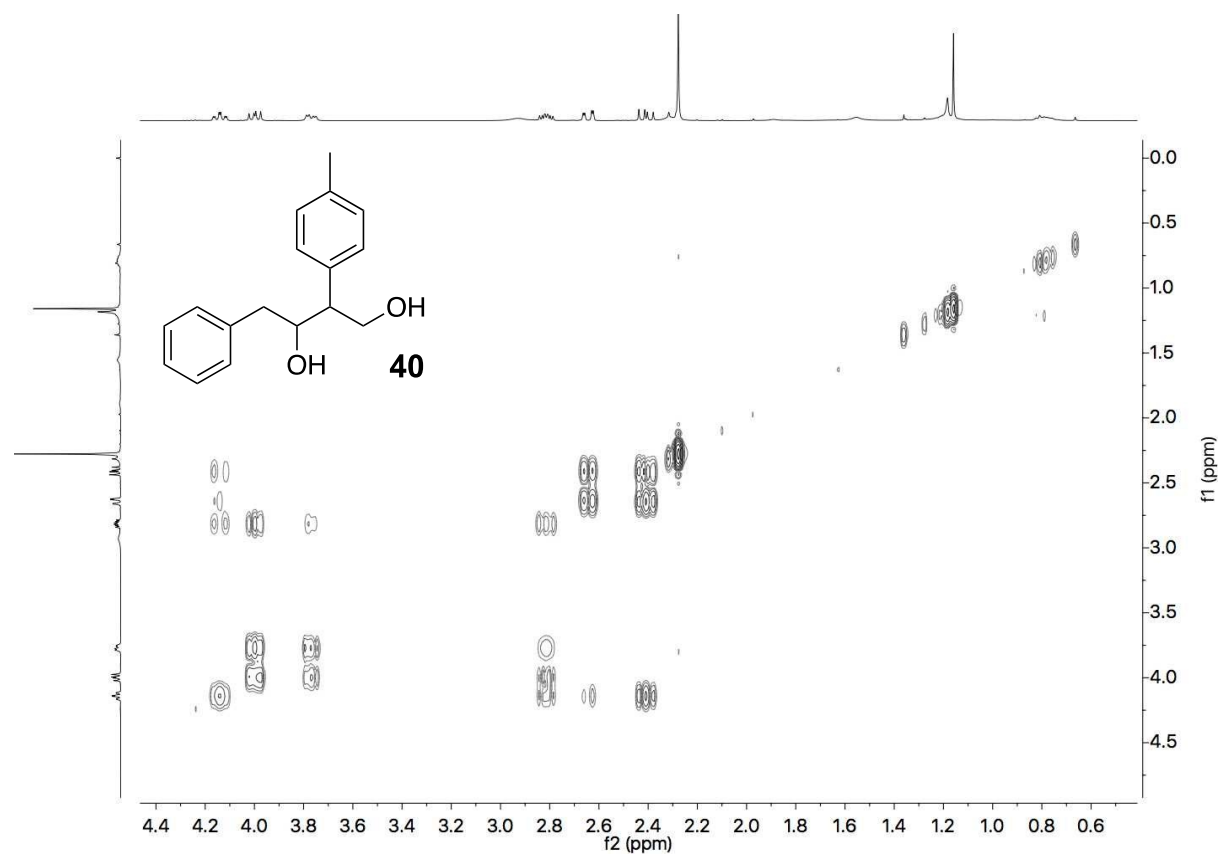



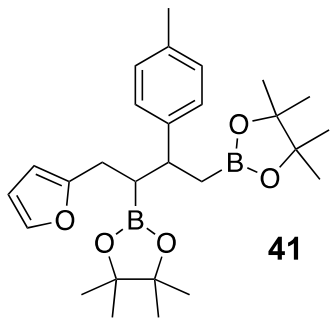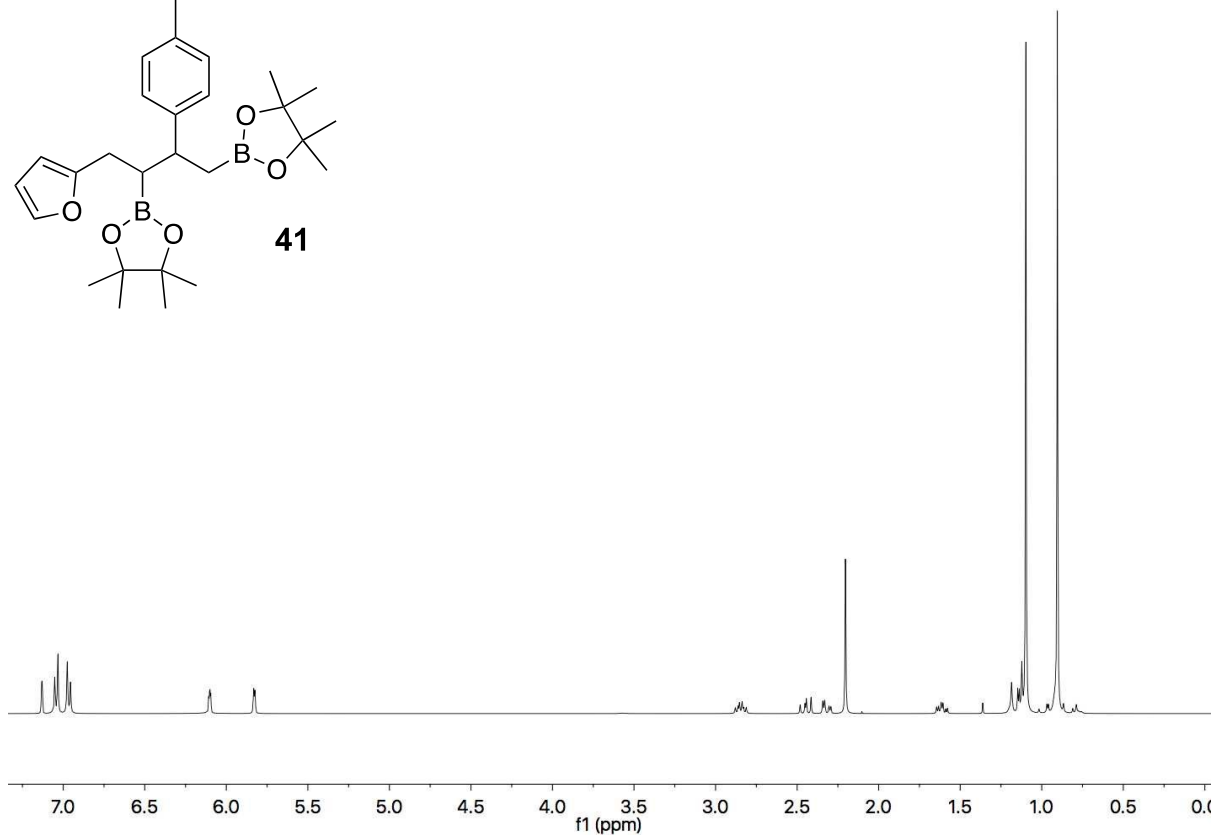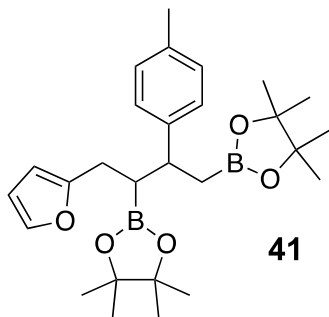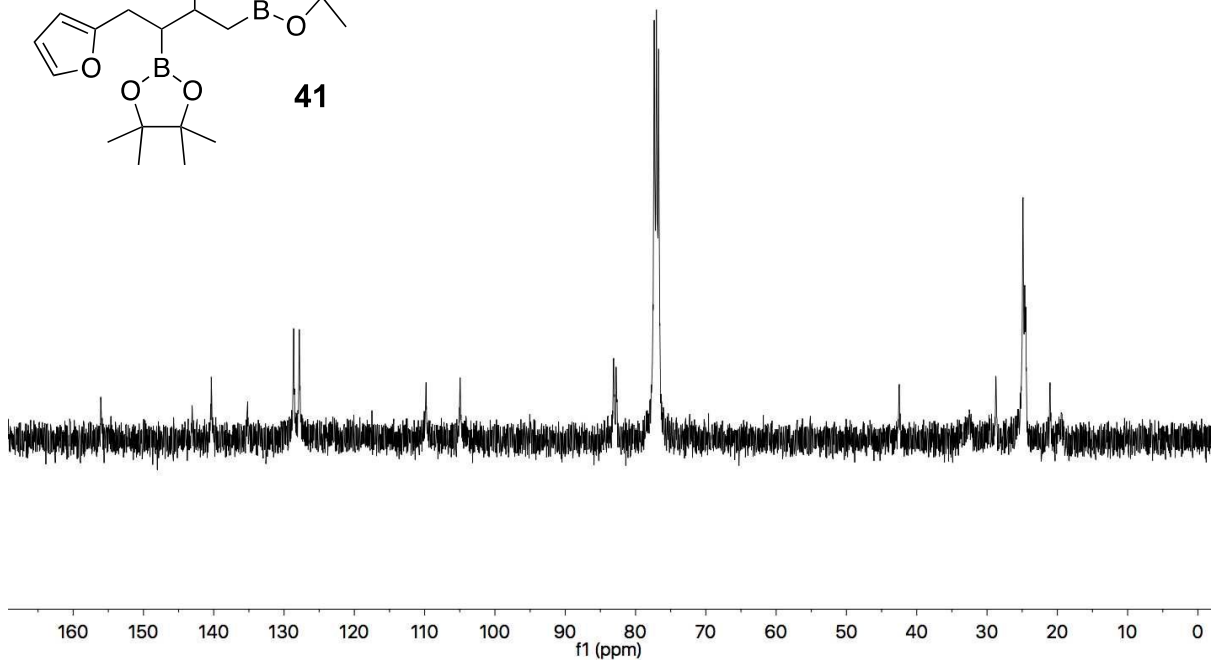

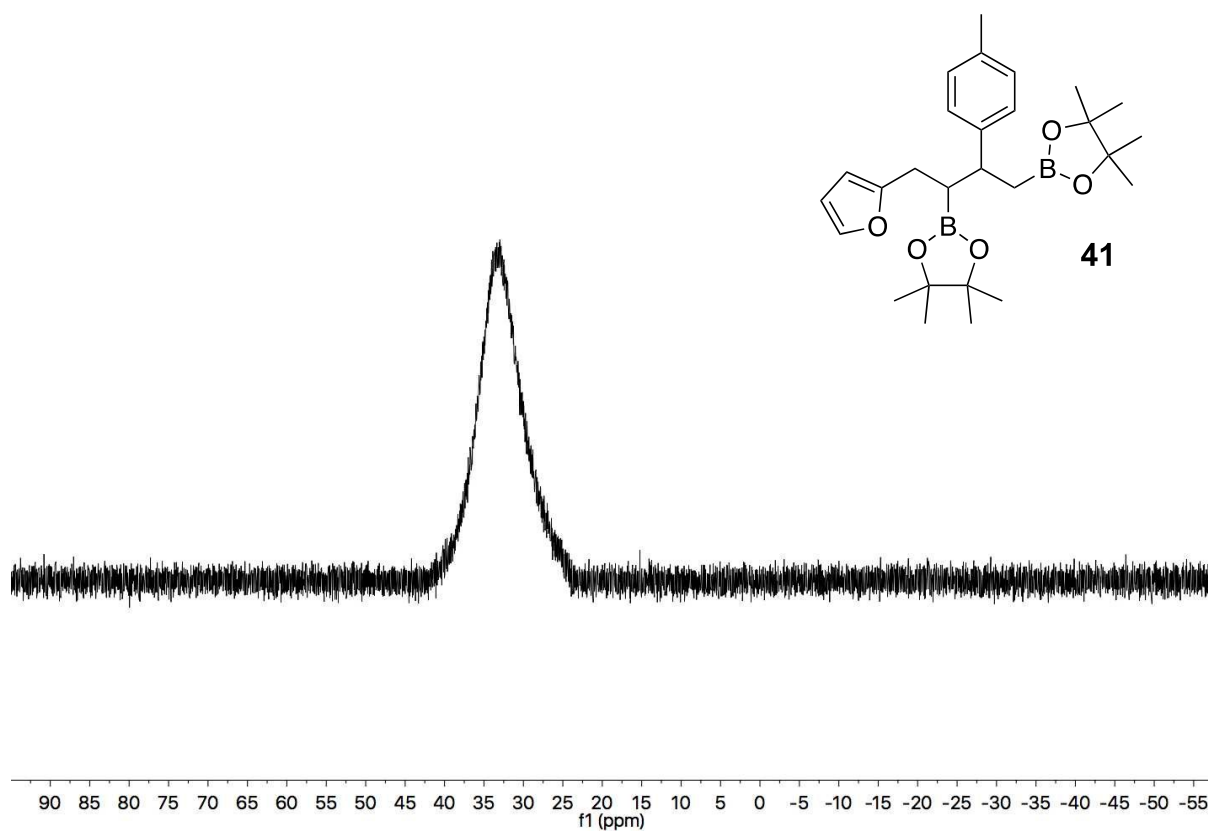

### X-Ray Crystal Data for **38**

Table 1. Crystal data and structure refinement for **38**

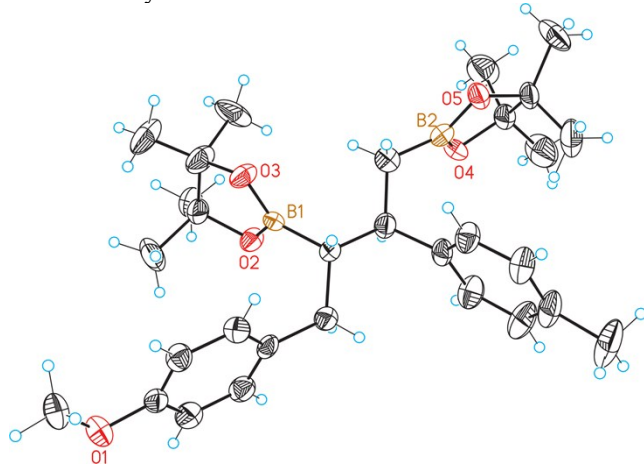

|                     |                                                               |
|---------------------|---------------------------------------------------------------|
| Identification code | mo_ED134_0m                                                   |
| Empirical formula   | C <sub>30</sub> H <sub>44</sub> B <sub>2</sub> O <sub>5</sub> |
| Formula weight      | 506.27                                                        |
| Temperature         | 100(2) K                                                      |
| Wavelength          | 0.71073 Å                                                     |
| Crystal system      | Monoclinic                                                    |

|                                   |                                             |                             |
|-----------------------------------|---------------------------------------------|-----------------------------|
| Space group                       | P2(1)/c                                     |                             |
| Unit cell dimensions              | a = 13.0983(18)Å                            | $\alpha = 90^\circ$ .       |
|                                   | b = 12.425(3)Å                              | $\beta = 95.349(5)^\circ$ . |
|                                   | c = 18.235(4)Å                              | $\gamma = 90^\circ$ .       |
| Volume                            | 2954.8(10) Å <sup>3</sup>                   |                             |
| Z                                 | 4                                           |                             |
| Density (calculated)              | 1.138 Mg/m <sup>3</sup>                     |                             |
| Absorption coefficient            | 0.074 mm <sup>-1</sup>                      |                             |
| F(000)                            | 1096                                        |                             |
| Crystal size                      | 0.20 x 0.10 x 0.05 mm <sup>3</sup>          |                             |
| Theta range for data collection   | 1.986 to 26.425°.                           |                             |
| Index ranges                      | -16<=h<=16,-15<=k<=15,-17<=l<=22            |                             |
| Reflections collected             | 25716                                       |                             |
| Independent reflections           | 5972[R(int) = 0.0479]                       |                             |
| Completeness to theta =26.425°    | 98.2%                                       |                             |
| Absorption correction             | Multi-scan                                  |                             |
| Max. and min. transmission        | 0.996 and 0.91                              |                             |
| Refinement method                 | Full-matrix least-squares on F <sup>2</sup> |                             |
| Data / restraints / parameters    | 5972/ 476/ 497                              |                             |
| Goodness-of-fit on F <sup>2</sup> | 1.017                                       |                             |
| Final R indices [I>2sigma(I)]     | R1 = 0.0769, wR2 = 0.1844                   |                             |
| R indices (all data)              | R1 = 0.1121, wR2 = 0.2055                   |                             |
| Largest diff. peak and hole       | 0.664 and -0.377 e.Å <sup>-3</sup>          |                             |

Table 2. Bond lengths [Å] and angles [°] for **38**

---

Bond lengths----

|       |          |
|-------|----------|
| O1-C7 | 1.384(3) |
| O1-C1 | 1.429(4) |
| C2-C7 | 1.376(4) |
| C2-C3 | 1.406(4) |
| C3-C4 | 1.408(4) |
| C4-C5 | 1.382(4) |
| C4-C8 | 1.524(4) |
| C5-C6 | 1.364(4) |
| C6-C7 | 1.392(4) |
| C8-C9 | 1.543(4) |



|           |           |
|-----------|-----------|
| C9-C16    | 1.541(4)  |
| C9-B1     | 1.581(4)  |
| B1-O2'    | 1.292(11) |
| B1-O3     | 1.338(6)  |
| B1-O2     | 1.409(6)  |
| B1-O3'    | 1.417(10) |
| O2-C10    | 1.461(5)  |
| O3-C13    | 1.460(5)  |
| C10-C12   | 1.444(7)  |
| C10-C13   | 1.528(6)  |
| C10-C11   | 1.596(8)  |
| C13-C14   | 1.472(9)  |
| C13-C15   | 1.620(9)  |
| O2'-C10'  | 1.464(7)  |
| O3'-C13'  | 1.470(7)  |
| C10'-C12' | 1.427(10) |
| C10'-C13' | 1.526(8)  |
| C10'-C11' | 1.621(11) |
| C13'-C14' | 1.467(10) |
| C13'-C15' | 1.606(11) |
| C16-C24   | 1.520(4)  |
| C16-C17   | 1.526(4)  |
| C17-C22   | 1.377(4)  |
| C17-C18   | 1.394(4)  |
| C18-C19   | 1.387(4)  |
| C19-C20   | 1.393(5)  |
| C20-C21   | 1.378(5)  |
| C20-C23   | 1.521(4)  |
| C21-C22   | 1.389(4)  |
| C24-B2    | 1.577(4)  |
| B2-O4     | 1.292(9)  |
| B2-O5'    | 1.302(8)  |
| B2-O5     | 1.370(6)  |
| B2-O4'    | 1.460(10) |
| O4-C25    | 1.482(6)  |
| O5-C28    | 1.456(6)  |
| C25-C27   | 1.494(8)  |
| C25-C28   | 1.534(7)  |

|           |          |
|-----------|----------|
| C25-C26   | 1.539(7) |
| C28-C29   | 1.514(7) |
| C28-C30   | 1.527(8) |
| O4'-C25'  | 1.475(7) |
| O5'-C28'  | 1.459(6) |
| C25'-C27' | 1.497(8) |
| C25'-C28' | 1.541(8) |
| C25'-C26' | 1.544(8) |
| C28'-C30' | 1.514(9) |
| C28'-C29' | 1.521(8) |

Angles-----

|             |          |
|-------------|----------|
| C7-O1-C1    | 116.7(2) |
| C7-C2-C3    | 119.0(3) |
| C2-C3-C4    | 120.6(3) |
| C5-C4-C3    | 118.0(3) |
| C5-C4-C8    | 120.0(3) |
| C3-C4-C8    | 122.0(3) |
| C6-C5-C4    | 121.9(3) |
| C5-C6-C7    | 120.0(3) |
| C2-C7-O1    | 124.3(3) |
| C2-C7-C6    | 120.5(3) |
| O1-C7-C6    | 115.2(3) |
| C4-C8-C9    | 115.3(2) |
| C16-C9-C8   | 113.4(2) |
| C16-C9-B1   | 111.0(2) |
| C8-C9-B1    | 110.5(2) |
| O3-B1-O2    | 112.0(3) |
| O2'-B1-O3'  | 114.0(5) |
| O2'-B1-C9   | 124.8(4) |
| O3-B1-C9    | 126.3(3) |
| O2-B1-C9    | 121.7(3) |
| O3'-B1-C9   | 121.2(4) |
| B1-O2-C10   | 106.6(4) |
| B1-O3-C13   | 109.2(4) |
| C12-C10-O2  | 109.8(4) |
| C12-C10-C13 | 118.9(5) |
| O2-C10-C13  | 103.6(4) |

|                |          |
|----------------|----------|
| C12-C10-C11    | 113.7(5) |
| O2-C10-C11     | 103.2(4) |
| C13-C10-C11    | 106.2(5) |
| O3-C13-C14     | 111.2(6) |
| O3-C13-C10     | 103.4(4) |
| C14-C13-C10    | 119.9(6) |
| O3-C13-C15     | 103.2(4) |
| C14-C13-C15    | 113.1(5) |
| C10-C13-C15    | 104.3(5) |
| B1-O2'-C10'    | 109.0(6) |
| B1-O3'-C13'    | 104.2(6) |
| C12'-C10'-O2'  | 107.4(8) |
| C12'-C10'-C13' | 121.9(9) |
| O2'-C10'-C13'  | 102.4(6) |
| C12'-C10'-C11' | 111.8(9) |
| O2'-C10'-C11'  | 108.1(8) |
| C13'-C10'-C11' | 104.3(8) |
| C14'-C13'-O3'  | 104.1(7) |
| C14'-C13'-C10' | 119.4(9) |
| O3'-C13'-C10'  | 103.3(6) |
| C14'-C13'-C15' | 114.2(9) |
| O3'-C13'-C15'  | 108.2(9) |
| C10'-C13'-C15' | 106.5(8) |
| C24-C16-C17    | 111.0(2) |
| C24-C16-C9     | 112.8(2) |
| C17-C16-C9     | 112.5(2) |
| C22-C17-C18    | 117.5(3) |
| C22-C17-C16    | 120.7(3) |
| C18-C17-C16    | 121.8(2) |
| C19-C18-C17    | 121.6(3) |
| C18-C19-C20    | 120.4(3) |
| C21-C20-C19    | 117.9(3) |
| C21-C20-C23    | 121.5(3) |
| C19-C20-C23    | 120.6(3) |
| C20-C21-C22    | 121.5(3) |
| C17-C22-C21    | 121.1(3) |
| C16-C24-B2     | 113.5(2) |
| O4-B2-O5       | 115.3(4) |

|                |          |
|----------------|----------|
| O5'-B2-O4'     | 108.8(5) |
| O4-B2-C24      | 124.2(4) |
| O5'-B2-C24     | 126.7(4) |
| O5-B2-C24      | 120.5(3) |
| O4'-B2-C24     | 124.1(4) |
| B2-O4-C25      | 107.6(5) |
| B2-O5-C28      | 105.6(4) |
| O4-C25-C27     | 110.3(6) |
| O4-C25-C28     | 102.0(5) |
| C27-C25-C28    | 115.9(6) |
| O4-C25-C26     | 106.6(5) |
| C27-C25-C26    | 109.6(7) |
| C28-C25-C26    | 111.9(6) |
| O5-C28-C29     | 107.9(5) |
| O5-C28-C30     | 104.0(5) |
| C29-C28-C30    | 110.1(6) |
| O5-C28-C25     | 102.7(4) |
| C29-C28-C25    | 117.4(6) |
| C30-C28-C25    | 113.4(5) |
| B2-O4'-C25'    | 108.3(6) |
| B2-O5'-C28'    | 112.1(5) |
| O4'-C25'-C27'  | 113.2(8) |
| O4'-C25'-C28'  | 101.9(6) |
| C27'-C25'-C28' | 114.6(8) |
| O4'-C25'-C26'  | 105.0(7) |
| C27'-C25'-C26' | 109.9(7) |
| C28'-C25'-C26' | 111.7(8) |
| O5'-C28'-C30'  | 107.5(6) |
| O5'-C28'-C29'  | 106.8(5) |
| C30'-C28'-C29' | 110.9(7) |
| O5'-C28'-C25'  | 103.3(6) |
| C30'-C28'-C25' | 113.1(6) |
| C29'-C28'-C25' | 114.5(7) |

-----

Table 3. Torsion angles [°] for **38**.

---

|                 |           |
|-----------------|-----------|
| C7-C2-C3-C4     | 0.3(4)    |
| C2-C3-C4-C5     | -0.7(4)   |
| C2-C3-C4-C8     | 178.9(2)  |
| C3-C4-C5-C6     | 0.7(4)    |
| C8-C4-C5-C6     | -178.9(3) |
| C4-C5-C6-C7     | -0.3(4)   |
| C3-C2-C7-O1     | -179.8(2) |
| C3-C2-C7-C6     | 0.2(4)    |
| C1-O1-C7-C2     | 8.0(4)    |
| C1-O1-C7-C6     | -172.0(3) |
| C5-C6-C7-C2     | -0.2(4)   |
| C5-C6-C7-O1     | 179.8(3)  |
| C5-C4-C8-C9     | 137.3(3)  |
| C3-C4-C8-C9     | -42.4(4)  |
| C4-C8-C9-C16    | -173.9(2) |
| C4-C8-C9-B1     | -48.5(3)  |
| C16-C9-B1-O2'   | 58.1(6)   |
| C8-C9-B1-O2'    | -68.6(6)  |
| C16-C9-B1-O3    | -96.9(4)  |
| C8-C9-B1-O3     | 136.4(4)  |
| C16-C9-B1-O2    | 81.8(4)   |
| C8-C9-B1-O2     | -44.9(4)  |
| C16-C9-B1-O3'   | -121.8(5) |
| C8-C9-B1-O3'    | 111.5(5)  |
| O3-B1-O2-C10    | -10.6(5)  |
| C9-B1-O2-C10    | 170.5(3)  |
| O2-B1-O3-C13    | -4.6(5)   |
| C9-B1-O3-C13    | 174.2(4)  |
| B1-O2-C10-C12   | 148.2(4)  |
| B1-O2-C10-C13   | 20.3(6)   |
| B1-O2-C10-C11   | -90.3(5)  |
| B1-O3-C13-C14   | 147.0(5)  |
| B1-O3-C13-C10   | 17.0(6)   |
| B1-O3-C13-C15   | -91.4(5)  |
| C12-C10-C13-O3  | -144.5(5) |
| O2-C10-C13-O3   | -22.4(6)  |
| C11-C10-C13-O3  | 85.9(5)   |
| C12-C10-C13-C14 | 91.0(8)   |

|                     |            |
|---------------------|------------|
| O2-C10-C13-C14      | -146.9(6)  |
| C11-C10-C13-C14     | -38.6(7)   |
| C12-C10-C13-C15     | -36.8(6)   |
| O2-C10-C13-C15      | 85.3(5)    |
| C11-C10-C13-C15     | -166.4(4)  |
| O3'-B1-O2'-C10'     | 6.4(10)    |
| C9-B1-O2'-C10'      | -173.5(5)  |
| O2'-B1-O3'-C13'     | 11.3(9)    |
| C9-B1-O3'-C13'      | -168.7(5)  |
| B1-O2'-C10'-C12'    | 108.9(10)  |
| B1-O2'-C10'-C13'    | -20.5(10)  |
| B1-O2'-C10'-C11'    | -130.3(9)  |
| B1-O3'-C13'-C14'    | 102.6(9)   |
| B1-O3'-C13'-C10'    | -22.9(9)   |
| B1-O3'-C13'-C15'    | -135.6(8)  |
| C12'-C10'-C13'-C14' | 151.4(11)  |
| O2'-C10'-C13'-C14'  | -88.8(9)   |
| C11'-C10'-C13'-C14' | 23.7(10)   |
| C12'-C10'-C13'-O3'  | -93.7(11)  |
| O2'-C10'-C13'-O3'   | 26.1(9)    |
| C11'-C10'-C13'-O3'  | 138.7(8)   |
| C12'-C10'-C13'-C15' | 20.3(13)   |
| O2'-C10'-C13'-C15'  | 140.1(9)   |
| C11'-C10'-C13'-C15' | -107.4(10) |
| C8-C9-C16-C24       | 177.5(2)   |
| B1-C9-C16-C24       | 52.4(3)    |
| C8-C9-C16-C17       | -56.0(3)   |
| B1-C9-C16-C17       | 178.9(2)   |
| C24-C16-C17-C22     | -127.6(3)  |
| C9-C16-C17-C22      | 104.9(3)   |
| C24-C16-C17-C18     | 54.1(3)    |
| C9-C16-C17-C18      | -73.4(3)   |
| C22-C17-C18-C19     | -1.1(4)    |
| C16-C17-C18-C19     | 177.3(3)   |
| C17-C18-C19-C20     | -0.9(5)    |
| C18-C19-C20-C21     | 1.7(5)     |
| C18-C19-C20-C23     | -176.2(3)  |
| C19-C20-C21-C22     | -0.6(5)    |

|                  |           |
|------------------|-----------|
| C23-C20-C21-C22  | 177.3(3)  |
| C18-C17-C22-C21  | 2.2(5)    |
| C16-C17-C22-C21  | -176.2(3) |
| C20-C21-C22-C17  | -1.4(5)   |
| C17-C16-C24-B2   | 51.5(3)   |
| C9-C16-C24-B2    | 178.8(3)  |
| C16-C24-B2-O4    | 53.2(5)   |
| C16-C24-B2-O5'   | -155.7(4) |
| C16-C24-B2-O5    | -125.3(4) |
| C16-C24-B2-O4'   | 31.9(6)   |
| O5-B2-O4-C25     | -4.1(6)   |
| C24-B2-O4-C25    | 177.3(4)  |
| O4-B2-O5-C28     | -13.2(6)  |
| C24-B2-O5-C28    | 165.4(4)  |
| B2-O4-C25-C27    | 142.1(7)  |
| B2-O4-C25-C28    | 18.5(6)   |
| B2-O4-C25-C26    | -98.9(6)  |
| B2-O5-C28-C29    | 148.1(5)  |
| B2-O5-C28-C30    | -94.9(5)  |
| B2-O5-C28-C25    | 23.5(6)   |
| O4-C25-C28-O5    | -25.1(6)  |
| C27-C25-C28-O5   | -144.9(6) |
| C26-C25-C28-O5   | 88.5(6)   |
| O4-C25-C28-C29   | -143.2(5) |
| C27-C25-C28-C29  | 96.9(8)   |
| C26-C25-C28-C29  | -29.7(8)  |
| O4-C25-C28-C30   | 86.5(6)   |
| C27-C25-C28-C30  | -33.4(8)  |
| C26-C25-C28-C30  | -160.0(6) |
| O5'-B2-O4'-C25'  | -3.7(8)   |
| C24-B2-O4'-C25'  | 169.9(5)  |
| O4'-B2-O5'-C28'  | -12.3(7)  |
| C24-B2-O5'-C28'  | 174.3(5)  |
| B2-O4'-C25'-C27' | 140.0(8)  |
| B2-O4'-C25'-C28' | 16.5(8)   |
| B2-O4'-C25'-C26' | -100.1(8) |
| B2-O5'-C28'-C30' | -97.4(7)  |
| B2-O5'-C28'-C29' | 143.6(7)  |

|                     |           |
|---------------------|-----------|
| B2-O5'-C28'-C25'    | 22.5(7)   |
| O4'-C25'-C28'-O5'   | -22.4(7)  |
| C27'-C25'-C28'-O5'  | -144.9(8) |
| C26'-C25'-C28'-O5'  | 89.3(8)   |
| O4'-C25'-C28'-C30'  | 93.5(8)   |
| C27'-C25'-C28'-C30' | -29.0(10) |
| C26'-C25'-C28'-C30' | -154.8(8) |
| O4'-C25'-C28'-C29'  | -138.0(7) |
| C27'-C25'-C28'-C29' | 99.4(9)   |
| C26'-C25'-C28'-C29' | -26.4(10) |

---
